# Supplementary material for: UBL7 is indispensable for spermiogenesis through protecting critical factors from excessive degradation by proteasomes
Source: Research Square preprint supplement (doi:10.21203/rs.3.rs-5024972/v1), 2024-09-11
Supplement: Supplementary file 1 [file 00a9fd4a4eacab5aefe1e884.xlsx]

## Sheet: Supplementary Fig7
Supplementary Fig. 7a			Supplementary Fig. 7b
protein dephosphorylation	2.76		gene	repeat 1	repeat 2	repeat 3
flagellated sperm motility	2.953		BC049730	-1.35476	-1.22769	-1.06492
small molecule biosynthetic process	3.399		G6pd2	-0.954557	-1.1047	-1.28983
glutathione metabolic process	3.873		Ldhc	-1.08927	-1.00868	-1.09851
ATP metabolic process	5.414		Sgta	-1.11716	-1	-1.05589
glycolytic process	6.091		Pgk2	-1.05289	-1.04097	-1.01742
			Prss52	-1.08927	-0.84944	-1
			Inpp1	-0.9771	-0.968605	-0.965784
			Ppp1cc	-0.957356	-0.951764	-1
			Actb	-0.962969	-1.13289	-0.826233
			Igbp1b	-1.02034	-0.985645	-0.836501
			Ppp3cc	-1.04394	-0.844251	-0.924125
			Dnpep	-1.07704	-0.854649	-0.85726
			Gpi	-0.913216	-0.888969	-0.962969
			Ugp2	-0.974262	-0.859876	-0.926865
			Fbp1	-0.883635	-0.891643	-0.979942
			Fhl4	-0.880976	-0.778432	-1.11404
			Prps1l1	-1.03505	-0.749038	-0.9771
			Fam78a	-0.873027	-0.907793	-0.883635
			Gapdhs	-0.91866	-0.833927	-0.905088
			Psmd6	-0.818579	-0.99137	-0.816037
			Arrdc5	-1.04394	-0.717857	-0.805913
			Psmd14	-0.932361	-0.897006	-0.703689
			Cct6a	-0.948976	-0.741783	-0.828793
			Dpep3	-0.985645	-0.668868	-0.836501
			Tex101	-0.91866	-0.628162	-0.937878
			Ppp1r7	-1.00578	-0.708396	-0.744197
			Amdhd2	-0.943416	-0.720232	-0.685014
			Cct4	-0.867752	-0.734563	-0.675765
			Gnpda1	-0.347399	-1.00578	-1.01742
			Atp1b3	-0.710756	-0.798366	-0.744197
			Psmc6	-0.894322	-0.744197	-0.619271
			Pdha2	-0.641604	-0.862496	-0.746616
			Aldh1a2	-0.708396	-0.614845	-0.891643
			Sucla2	-0.761213	-0.766112	-0.671164
			Sypl	-0.75877	-0.744197	-0.675765
			Sord	-0.899695	-0.646112	-0.630394
			Cct2	-0.888969	-0.671164	-0.606035
			Psmd3	-0.846843	-0.698998	-0.556393
			Cct8	-0.682696	-0.657445	-0.595097
			Spam1	-0.72738	-0.529073	-0.58208
			Ldhal6b	-0.680382	-0.639355	-0.422752
			Slc16a7	-0.76366	-0.469929	-0.469929
			Aldoa	-0.800877	-0.367732	-0.524915
			Slc2a3	-0.766112	-0.380822	-0.508403
			Acat1	-0.473931	-0.496142	-0.614845
			Atp8b3	-0.621488	-0.488026	-0.465938
			Stxbp2	-0.599462	-0.518701	-0.450084
			Prss21	-0.300448	-0.430509	-0.761213
			Prss46	-0.512514	-0.295128	-0.630394
			Bsg	-0.685014	-0.364013	-0.265345
			Oxct2a	-0.522841	-0.508403	-0.231075
			Atp6v1b2	-0.541618	-0.237864	-0.479955
			Hibadh	-0.416962	-0.351074	-0.236164
			Erlin2	-1.03209	-0.21424	0.0745054
			Prps2	-0.506353	-0.274041	-0.182786
			Ace	-0.291592	-0.244685	-0.405451
			Dars	-0.456009	-0.248108	-0.209228
			Lap3	-0.0846703	-0.288065	-0.401635
			Phgdh	-0.504305	-0.013043	-0.239566
			Wdr1	-0.364013	-0.166503	-0.15682
			Atp6v1b1	-0.0923402	-0.22095	-0.251539
			Wars	-0.37707	0.0799754	-0.277534
			Gnb1	-0.129734	-0.217591	-0.184425
			Cth	-0.510457	0.0648829	-0.0800879
			Eef1a1	-0.251539	-0.0634092	-0.147202
			Gapdh	0.0100637	-0.139236	-0.275786
			Ptgr1	-0.552156	0.0607392	0.0299829
			Ca4	0.157044	-0.246395	-0.311148
			Ezr	-0.104697	-0.117161	-0.128156
			Napa	0.0731347	-0.190997	-0.249822
			Aldh1a1	-0.2567	0.0440443	-0.148801
			Glul	-0.275786	0.348232	-0.516636
			Fkbp4	-0.242977	-0.0247367	-0.0380063
			Lman1	0.0621217	-0.134477	-0.199255
			G6pdx	-0.114035	-0.0306192	-0.0985055
			Ggt1	-0.134477	0.0143553	-0.0877334
			Rplp0	-0.00578235	-0.093879	-0.0679388
			Atp5c1	-0.0664274	-0.0816138	-0.0174171
			Alad	-0.21424	0.0356239	0.00575927
			Pls3	-0.00288828	-0.0499049	-0.0816138
			Lasp1	0.107018	0.0229004	-0.21927
			Cpne3	-0.205896	-0.202572	0.290424
			Glud1	-0.0247367	-0.0709665	0.0426443
			Sil1	0.119024	-0.0218044	-0.150401
			Dnajc3	0.196607	-0.0232698	-0.200913
			Hsd17b11	0.0468403	-0.077041	0.0398403
			P4hb	0.167358	-0.00868224	-0.163268
			Slc25a5	0.237564	0.00432161	-0.142417
			Uggt1	0.0440443	0.0894982	-0.00433459
			Rpn2	0.138814	0.0071955	0.015783
			Pcyox1	0.115033	0.0962619	0.0299829
			Ddost	0.130931	0.0129262	0.153157
			Pdia3	0.350497	0.119024	-0.14401
			Vdac3	0.306846	0.0799754	0.0071955
			Lrpap1	0.505891	-0.107803	-0.046921
			Mlec	0.552869	0.0200577	-0.115597
			Anxa13	0.334568	0.077243	0.715454
			Akr1b7	0.922198	-0.0380063	1.28983
