# Supplementary material for: UBL7 is indispensable for spermiogenesis through protecting critical factors from excessive degradation by proteasomes
Source: Research Square preprint supplement (doi:10.21203/rs.3.rs-5024972/v1), 2024-09-11
Supplement: Supplementary file 2 [file 0fd61d54ad5ae3a2090074b0.xlsx]

## Sheet: Supplementary Table 3
Supplementary Table 3. Two-step-immunoprecipitation-based identification of putative substrates of UBL7 and their protein level in Ubl7-/- sperm versus Ubl7+/- sperm detected by TMT-based quantitative proteomic.
Gene name	FLAG IP + TUBE IP		Quantitative sperm proteome (Ubl7-/-/Ubl7+/-)
	FLAG matched queries	WT matched queries	repeat 1	repeat 2	repeat 3	Fold change (log2(Ubl7-/-/Ubl7+/-))	p-value
Uba52	121	8	#N/A	#N/A	#N/A	#N/A	#N/A
Ube4b	100	0	0.384	0.505	1.092	-0.598734	0.195259
Vcp	63	2	#N/A	#N/A	#N/A	#N/A	#N/A
Hspa2	41	6	0.736	0.879	0.895	-0.257275	0.0319314
Ubl7	40	19	#N/A	#N/A	#N/A	#N/A	#N/A
Bat3	26	0	#N/A	#N/A	#N/A	#N/A	#N/A
Hspa8	22	6	1	0.981	1.03	0.00528021	0.809808
Ngly1	18	0	0.677	0.769	0.795	-0.42082	0.00211421
Hspa1l	14	0	0.672	0.698	0.674	-0.553567	2.82002e-06
Krt77	12	0	#N/A	#N/A	#N/A	#N/A	#N/A
Psmd2	11	0	0.52	0.582	0.606	-0.812655	7.34182e-05
Nploc4	10	0	0.641	0.792	0.754	-0.456009	0.00393958
Hspa1b	7	0	#N/A	#N/A	#N/A	#N/A	#N/A
Nup210l	7	0	0.556	0.658	0.624	-0.706826	0.000207149
Trafd1	5	0	#N/A	#N/A	#N/A	#N/A	#N/A
Ccdc54	5	0	#N/A	#N/A	#N/A	#N/A	#N/A
Usp25	5	0	#N/A	#N/A	#N/A	#N/A	#N/A
Alb	5	1	0.861	0.956	0.768	-0.214798	0.0633799
Pomt2	4	0	#N/A	#N/A	#N/A	#N/A	#N/A
Krt78	4	0	#N/A	#N/A	#N/A	#N/A	#N/A
Hist1h1c	4	0	0.998	1.015	1.447	0.20581	0.355553
Acta1	4	0	#N/A	#N/A	#N/A	#N/A	#N/A
Prss1	4	0	1.471	0.997	1.092	0.246915	0.266814
Hist1h1d	3	0	0.953	0.931	1.487	0.168214	0.533642
Pomt1	3	0	#N/A	#N/A	#N/A	#N/A	#N/A
Mbp	3	0	#N/A	#N/A	#N/A	#N/A	#N/A
Tubb2b	3	0	0.78	1.122	0.837	-0.131313	0.457045
Spata20	3	0	0.679	0.956	0.932	-0.224879	0.178653
Ywhaz	3	1	0.56	0.595	0.603	-0.771027	6.16555e-06
Hk1	3	1	0.449	0.472	0.46	-1.11925	1.37501e-07
Akr1b3	3	1	#N/A	#N/A	#N/A	#N/A	#N/A
Tuba1a	3	1	#N/A	#N/A	#N/A	#N/A	#N/A
Dlat	2	0	0.73	0.806	0.749	-0.392768	0.000476109
Ybx2	2	0	0.943	1.048	1.112	0.0487012	0.524216
Ift88	2	0	#N/A	#N/A	#N/A	#N/A	#N/A
Ubac1	2	0	0.534	0.717	0.813	-0.53952	0.0188989
Piwil1	2	0	0.841	0.897	0.912	-0.17897	0.0056923
Igkv1-117	2	0	#N/A	#N/A	#N/A	#N/A	#N/A
Bscl2	2	0	#N/A	#N/A	#N/A	#N/A	#N/A
Irgc1	2	0	#N/A	#N/A	#N/A	#N/A	#N/A
Gapdhs	2	0	0.529	0.561	0.534	-0.885411	1.31863e-06
Clint1	2	0	1.431	1.071	0.926	0.192405	0.39575
Maged1	2	0	#N/A	#N/A	#N/A	#N/A	#N/A
Ldha	2	0	0.734	0.968	1.07	-0.114035	0.487373
Atr	2	0	#N/A	#N/A	#N/A	#N/A	#N/A
Atp2a2	2	0	1.128	0.994	0.923	0.0214797	0.81521
Ube3a	2	0	0.514	0.54	0.575	-0.880976	1.32863e-05
Atp5a1	2	0	#N/A	#N/A	#N/A	#N/A	#N/A
Aldh2	2	0	1.117	1.597	1.762	0.577248	0.0637624
Psmd3	2	0	0.556	0.616	0.68	-0.695878	0.000434077
Glt25d1	2	0	#N/A	#N/A	#N/A	#N/A	#N/A
Sucla2	2	0	0.59	0.588	0.628	-0.732165	6.80793e-06
Dnahc8	2	0	#N/A	#N/A	#N/A	#N/A	#N/A
Psmd1	2	0	0.493	0.535	0.558	-0.91957	1.57695e-05
Tsnaxip1	2	1	#N/A	#N/A	#N/A	#N/A	#N/A
Eno1	2	1	0.653	0.775	0.73	-0.475268	0.00140251
H2afj	2	1	#N/A	#N/A	#N/A	#N/A	#N/A
Cand1	2	1	0.708	0.799	0.8	-0.378944	0.00162973
Gstm5	1	0	0.495	0.411	0.472	-1.12239	2.73093e-05
Cct5	1	0	0.571	0.648	0.655	-0.678842	0.000153234
Pfkp	1	0	0.519	0.535	0.511	-0.9388	2.83576e-07
Dok6	1	0	#N/A	#N/A	#N/A	#N/A	#N/A
Ldhal6b	1	0	0.624	0.642	0.746	-0.576332	0.00097762
Anxa2	1	0	0.713	0.937	1.044	-0.155213	0.354632
Mre11a	1	0	#N/A	#N/A	#N/A	#N/A	#N/A
Slc2a3	1	0	0.588	0.768	0.703	-0.543019	0.00397798
Eef1a2	1	0	#N/A	#N/A	#N/A	#N/A	#N/A
Eef2	1	0	0.706	0.906	0.867	-0.275204	0.0470015
Atp2a1	1	0	#N/A	#N/A	#N/A	#N/A	#N/A
Cct3	1	0	0.628	0.694	0.703	-0.567041	0.000162283
Defb4	1	0	#N/A	#N/A	#N/A	#N/A	#N/A
Myom1	1	0	#N/A	#N/A	#N/A	#N/A	#N/A
Vps26b	1	0	#N/A	#N/A	#N/A	#N/A	#N/A
Tmem87a	1	0	1.234	0.916	0.844	-0.00288828	0.987482
Aco2	1	0	0.79	0.669	0.751	-0.440916	0.00179233
Plaa	1	0	0.682	0.789	0.726	-0.449428	0.000995493
Srrm1	1	0	#N/A	#N/A	#N/A	#N/A	#N/A
Tktl1	1	0	#N/A	#N/A	#N/A	#N/A	#N/A
Clgn	1	0	1.2	1.023	0.871	0.0445107	0.758242
Vps16	1	0	#N/A	#N/A	#N/A	#N/A	#N/A
Srrm2	1	0	0.936	1.18	1	0.0547327	0.624561
Ncor1	1	0	#N/A	#N/A	#N/A	#N/A	#N/A
Ercc6l2	1	0	#N/A	#N/A	#N/A	#N/A	#N/A
Nup85	1	0	0.678	0.749	0.976	-0.320126	0.0911837
Slmap	1	0	0.781	0.937	1.063	-0.109359	0.421353
Pebp1	1	0	0.628	0.635	0.522	-0.749038	0.000377514
Nxf2	1	0	#N/A	#N/A	#N/A	#N/A	#N/A
Hdgfrp2	1	0	#N/A	#N/A	#N/A	#N/A	#N/A
Ddi2	1	0	0.79	1.206	1.134	0.0612002	0.752644
Pkm2	1	0	#N/A	#N/A	#N/A	#N/A	#N/A
Ubac2	1	0	#N/A	#N/A	#N/A	#N/A	#N/A
Acyp1	1	0	0.731	1.081	1.007	-0.089779	0.601314
Cad	1	0	0.745	0.999	0.89	-0.187707	0.172593
Canx	1	0	1.193	1.056	0.977	0.104784	0.298481
Amfr	1	0	0.983	0.943	0.986	-0.0429521	0.101761
Blnk	1	0	#N/A	#N/A	#N/A	#N/A	#N/A
Piwil2	1	0	#N/A	#N/A	#N/A	#N/A	#N/A
Pgam2	1	0	0.57	0.523	0.46	-0.949905	0.000111056
Cul7	1	0	#N/A	#N/A	#N/A	#N/A	#N/A
Lancl1	1	0	0.727	0.929	0.878	-0.243546	0.0625551
Slc7a5	1	0	1.069	1.063	1.22	0.16006	0.0843748
Ddx17	1	0	#N/A	#N/A	#N/A	#N/A	#N/A
Gosr2	1	0	0.817	0.927	0.924	-0.169204	0.0376941
Ubqln2	1	0	0.654	0.992	0.965	-0.20036	0.297862
Ift140	1	0	0.84	1.589	1.028	0.204558	0.535477
Tsga8	1	0	#N/A	#N/A	#N/A	#N/A	#N/A
Nasp	1	0	1.068	1.053	1.142	0.121236	0.033319
Fxr1	1	0	0.736	1.147	1.029	-0.0429521	0.822065
Pfkm	1	0	0.576	0.57	0.652	-0.738569	0.000109732
Peg10	1	0	#N/A	#N/A	#N/A	#N/A	#N/A
Cecr5	1	0	#N/A	#N/A	#N/A	#N/A	#N/A
Fkbp1a	1	0	0.645	0.776	0.82	-0.42082	0.00856196
Cul3	1	0	0.566	0.642	0.68	-0.668104	0.000379978
Ptbp2	1	0	#N/A	#N/A	#N/A	#N/A	#N/A
Wrn	1	0	#N/A	#N/A	#N/A	#N/A	#N/A
Gdf7	1	0	#N/A	#N/A	#N/A	#N/A	#N/A
Atp1a3	1	0	#N/A	#N/A	#N/A	#N/A	#N/A
Dgkk	1	0	#N/A	#N/A	#N/A	#N/A	#N/A
Pdilt	1	0	1.122	1.276	1.446	0.357646	0.039679
Rasgrf2	1	0	#N/A	#N/A	#N/A	#N/A	#N/A
Hnrnph2	1	0	#N/A	#N/A	#N/A	#N/A	#N/A
Ubr4	1	0	0.672	0.815	0.787	-0.39973	0.00522096
Rnf160	1	0	#N/A	#N/A	#N/A	#N/A	#N/A
Ube3c	1	0	#N/A	#N/A	#N/A	#N/A	#N/A
Gcap14	1	0	#N/A	#N/A	#N/A	#N/A	#N/A
Stk31	1	0	#N/A	#N/A	#N/A	#N/A	#N/A
Ift122	1	0	#N/A	#N/A	#N/A	#N/A	#N/A
Herc4	1	0	0.547	0.655	0.662	-0.686561	0.000525813
Sppl2c	1	0	0.731	1.112	1.229	0.0342157	0.880905
Tnnc2	1	0	#N/A	#N/A	#N/A	#N/A	#N/A
Ttc39d	1	0	0.657	0.709	0.75	-0.503623	0.000395066
Pabpc2	1	0	0.848	1.057	0.756	-0.172994	0.273284
Usp9x	1	0	0.862	0.953	1.051	-0.0659239	0.459035
Gmcl1	1	0	#N/A	#N/A	#N/A	#N/A	#N/A
Faf1	1	0	0.53	0.77	0.711	-0.577049	0.0102938
Rpl29	1	0	1.124	1.032	1.23	0.174619	0.0877219
Abce1	1	0	0.873	1.05	0.808	-0.135533	0.282738
Hnrnpk	1	0	0.977	0.948	1.046	-0.0140139	0.756146
Sfmbt1	1	0	#N/A	#N/A	#N/A	#N/A	#N/A
Topaz1	1	0	#N/A	#N/A	#N/A	#N/A	#N/A
Polr2b	1	0	0.727	0.833	0.983	-0.238431	0.109535
Atp1a4	1	0	0.574	0.622	0.679	-0.678072	0.0002465
