# Supplementary material for: UBL7 is indispensable for spermiogenesis through protecting critical factors from excessive degradation by proteasomes
Source: Research Square preprint supplement (doi:10.21203/rs.3.rs-5024972/v1), 2024-09-11
Supplement: Supplementary file 3 [file 41d60838ea2b265c3eca22ff.xlsx]

## Sheet: Fig1
Fig. 1e			Fig. 1h
Ubl7+/-	Ubl7-/-		Ubl7+/-	Ubl7-/-
0.26644	0.160675		11.43	3
0.287856	0.139285		19.56	3.12
0.197975	0.14343		7.87	5.18
0.22458	0.141607		27.5	5.81
0.187988	0.124512		17.25	6.06
0.257207	0.162043		11.3	6.37
Fig. 1g
	Ubl7+/-	Ubl7-/-
Spg	7.533	12.674
	8.36174	8.8877
	6.8574	8.85753
	8.92894	14.9781
	12.9715	6.92141
		14.1825
		11.3528
L+Z	20.0338	21.7943
	19.909	20.703
	17.8288	19.8023
	16.2195	23.4291
	22.5347	11.3675
		14.9376
		13.9014
P+D	10.044	5.56281
	8.83569	5.33027
	10.6435	9.7376
	8.376	8.15879
	6.41959	8.36337
		5.64675
		8.80422
MII	4.72416	4.89934
	4.90026	5.8567
	4.10464	3.65557
	2.98997	2.28933
	1.81999	2.21101
		1.87131
		3.38525
RS	57.665	55.0696
	57.9933	59.2224
	60.5657	57.947
	63.4856	51.1447
	56.2541	71.1368
		63.3618
		62.5563
