# Supplementary material for: UBL7 is indispensable for spermiogenesis through protecting critical factors from excessive degradation by proteasomes
Source: Research Square preprint supplement (doi:10.21203/rs.3.rs-5024972/v1), 2024-09-11
Supplement: Supplementary file 4 [file 4333927eace9af85c5f5a633.xlsx]

## Sheet: Fig4
Fig. 4a
protein stabilization	3.309
protein folding	5.069
protein quality control for misfolded or incompletely synthesized proteins	5.836
ER-associated misfolded protein catabolic process	7.005
response to endoplasmic reticulum stress	7.779
ERAD pathway	10.069
