# Supplementary material for: UBL7 is indispensable for spermiogenesis through protecting critical factors from excessive degradation by proteasomes
Source: Research Square preprint supplement (doi:10.21203/rs.3.rs-5024972/v1), 2024-09-11
Supplement: Supplementary file 5 [file 5079316143a75556907a15ac.xlsx]

## Sheet: Supplementary Fig4
Supplementary Fig. 4a
	UBL7+/-			UBL7-/-
Caput	9.13706	9.52381	4.6875	17.2589	30.4762	21.1268
Corpus	9.64467	12.5		24.8731	25.2427
Cauda	4.52261	14.1414	8.62069	51.5625	47.4747	46.875
Supplementary Fig. 4b
	UBL7+/-			UBL7-/-
Caput	4.86486	3.80952	0.78125	9.15493	8.91089	9.52381
Corpus	5.71429	5.35714		15.736	18.4466	20.9091
Cauda	3.2	2.0202	4.31034	28.125	34.1463	54.5455
