# Supplementary material for: UBL7 is indispensable for spermiogenesis through protecting critical factors from excessive degradation by proteasomes
Source: Research Square preprint supplement (doi:10.21203/rs.3.rs-5024972/v1), 2024-09-11
Supplement: Supplementary file 6 [file 6d013e470921ada07b566646.xlsx]

## Sheet: Supplementary Table 2
Supplementary Table 2. TMT-labeled quantitative proteomics of Ubl7+/- and Ubl7-/- sperm
Gene name	repeat 1 (Ubl7-/-/Ubl7+/-)	repeat 2 (Ubl7-/-/Ubl7+/-)	repeat 3 (Ubl7-/-/Ubl7+/-)	Fold change (Ubl7-/-/Ubl7+/-)	p_value
Hp	0.221	1.163	0.817	0.733667	0.38781
Hbb-bs	1.392	2.352	1.899	1.881	0.03362
Ldhc	0.47	0.497	0.467	0.478	6.67707e-07
Rhobtb3	0.283	0.689	0.792	0.588	0.0568803
Oxct2a	0.696	0.703	0.852	0.750333	0.00800021
Oxct2b	0.579	0.685	0.814	0.692667	0.0106328
Hba-a1	1.412	2.627	1.868	1.969	0.0521988
Hsp90b1	1.137	1.053	0.884	1.02467	0.756866
Hspa5	1.15	1.042	0.926	1.03933	0.575927
Pgk2	0.482	0.486	0.494	0.487333	1.3447e-08
Ldhal6b	0.624	0.642	0.746	0.670667	0.00097762
Hspd1	0.739	0.83	0.817	0.795333	0.00196944
Atp5f1b	0.788	0.919	0.902	0.869667	0.0338892
Hk1	0.449	0.472	0.46	0.460333	1.37501e-07
Calr	1.247	1.082	0.842	1.057	0.653185
Sucla2	0.59	0.588	0.628	0.602	6.80793e-06
Alb	0.861	0.956	0.768	0.861667	0.0633799
Mup18	0.35	0.596	0.746	0.564	0.019483
Slc2a3	0.588	0.768	0.703	0.686333	0.00397798
Calm1	0.768	0.751	0.809	0.776	0.000201285
Capzb	0.364	1.037	1.082	0.827667	0.499191
Sord	0.536	0.639	0.646	0.607	0.000381037
Pgam2	0.57	0.523	0.46	0.517667	0.000111056
Pebp1	0.628	0.635	0.522	0.595	0.000377514
Pdia3	1.275	1.086	0.905	1.08867	0.453167
Atp2b4	0.605	0.679	0.621	0.635	8.41846e-05
Gm11492	0.38	0.847	0.785	0.670667	0.087736
Csl	0.608	0.604	0.589	0.600333	2.62665e-07
Gstt4	0.384	0.387	0.461	0.410667	1.97592e-05
Ube4b	0.384	0.505	1.092	0.660333	0.195259
Timm8a2	0.385	0.462	0.509	0.452	0.000110318
Gga3	0.387	0.558	0.474	0.473	0.000436146
Aco2	0.79	0.669	0.751	0.736667	0.00179233
Cltc	0.942	0.928	0.902	0.924	0.0029145
Atp1a4	0.574	0.622	0.679	0.625	0.0002465
Ahnak	0.834	0.921	1.168	0.974333	0.810166
Hspa2	0.736	0.879	0.895	0.836667	0.0319314
Cs	0.678	0.707	0.661	0.682	1.8856e-05
4930544D05Rik	0.399	0.409	0.621	0.476333	0.00193762
Osbp2	0.399	0.546	0.547	0.497333	0.000515868
Pdhb	0.738	0.584	0.72	0.680667	0.00277881
Hspa9	0.819	0.862	0.831	0.837333	0.000221557
Dhdh	0.404	0.958	0.867	0.743	0.208409
Mdh2	0.802	0.834	0.764	0.8	0.000587656
Dld	0.632	0.651	0.735	0.672667	0.000493011
Rrbp1	1.278	1.219	0.934	1.14367	0.247562
Gpi	0.531	0.54	0.513	0.528	4.78901e-07
Hspa1l	0.672	0.698	0.674	0.681333	2.82002e-06
Krt8	1.156	1.187	0.858	1.067	0.557691
Slc25a31	0.614	0.602	0.667	0.627667	4.87083e-05
Sdha	0.79	0.635	0.767	0.730667	0.00506644
Tkfc	0.536	0.573	0.563	0.557333	2.32034e-06
Acsl1	0.853	0.816	0.741	0.803333	0.00395608
Krt10	0.416	2.023	1.164	1.201	0.687382
Dmd	0.416	0.583	1.24	0.746333	0.370213
Spesp1	0.526	0.696	0.639	0.620333	0.00160807
Fbp1	0.542	0.539	0.507	0.529333	1.91674e-06
Tubb5	0.847	1.256	0.799	0.967333	0.832794
Ptpn20	0.422	0.517	0.51	0.483	7.16373e-05
Cct2	0.54	0.628	0.657	0.608333	0.000370284
Slc4a1	1.207	1.733	1.666	1.53533	0.0317185
Ywhaz	0.56	0.595	0.603	0.586	6.16555e-06
Ace	0.817	0.844	0.755	0.805333	0.00178891
Ment	0.538	0.733	0.672	0.647667	0.00361507
Dync1h1	0.889	0.956	1.053	0.966	0.514569
Cyct	0.607	0.648	0.579	0.611333	4.1633e-05
Cct4	0.548	0.601	0.626	0.591667	5.90897e-05
Tnfaip2	0.432	0.654	0.632	0.572667	0.00376338
Hspa4l	0.64	0.741	0.744	0.708333	0.00103473
Serpina1e	0.434	1.428	0.949	0.937	0.837001
Ak2	0.552	0.641	0.643	0.612	0.000206306
Cct8	0.623	0.634	0.662	0.639667	6.42053e-06
Cct7	0.564	0.633	0.668	0.621667	0.000244445
Tpp2	0.54	0.563	0.584	0.562333	4.23826e-06
Gml2	0.437	0.683	0.425	0.515	0.00448155
Nucb2	1.304	1.091	0.871	1.08867	0.517281
Lrrc47	0.438	0.767	1.077	0.760667	0.264303
Washc4	0.438	0.684	0.903	0.675	0.0727798
Cuzd1	0.758	0.803	0.736	0.765667	0.000287073
Cmtm2b	0.439	0.856	1.727	1.00733	0.985506
Lrrc43	0.439	0.796	0.908	0.714333	0.113485
Krt18	1.245	1.14	0.795	1.06	0.681716
Tmem225	0.443	0.855	1.698	0.998667	0.997292
Eno1	0.653	0.775	0.73	0.719333	0.00140251
Got2	1.151	1.184	0.886	1.07367	0.478406
Drg2	0.444	0.861	1.079	0.794667	0.332212
Tbce	0.445	0.684	0.711	0.613333	0.010226
Pgk1	0.663	0.841	0.901	0.801667	0.0500592
Ak1	0.535	0.59	0.466	0.530333	0.00019647
Hsp90ab1	0.839	0.932	0.83	0.867	0.0151072
Tcp1	0.554	0.619	0.649	0.607333	0.000150801
Pdha2	0.641	0.55	0.596	0.595667	0.00010397
Gml	0.449	0.659	0.547	0.551667	0.00178776
Zpbp	0.577	0.704	0.626	0.635667	0.000595281
Aldoart2	0.512	0.524	0.41	0.482	0.000138059
Rps28	0.451	0.968	1.315	0.911333	0.741748
Ezr	0.93	0.922	0.915	0.922333	5.69562e-05
Pkm	0.841	0.806	0.734	0.793667	0.00280779
Crat	0.635	0.612	0.613	0.62	9.10792e-07
Cct5	0.571	0.648	0.655	0.624667	0.000153234
Spink2	0.478	0.609	0.458	0.515	0.000512244
Ap1s1	0.457	0.707	0.72	0.628	0.0121887
Park7	0.566	0.658	0.717	0.647	0.0013024
Acaa2	1.126	1.061	0.879	1.022	0.780814
Btf3	0.458	0.896	0.834	0.729333	0.119081
Manbal	0.458	0.614	0.988	0.686667	0.11711
Exosc4	0.459	0.55	1.091	0.7	0.202938
Hadha	0.801	0.78	0.763	0.781333	3.76458e-05
Spata32	0.46	0.743	0.869	0.690667	0.0627781
Ankrd36	0.46	0.851	0.836	0.715667	0.090313
Spaca1	0.492	0.699	0.662	0.617667	0.00388532
Dnpep	0.474	0.553	0.552	0.526333	5.47739e-05
Ca4	1.115	0.843	0.806	0.921333	0.464661
AK157302	0.462	0.898	0.627	0.662333	0.05658
Nudt3	0.462	0.859	0.722	0.681	0.0519052
Uba1	0.65	0.759	0.773	0.727333	0.00217633
Psmd1	0.493	0.535	0.558	0.528667	1.57695e-05
Gm5134	0.463	0.714	0.549	0.575333	0.00448843
Ethe1	0.464	0.991	0.987	0.814	0.347765
Zmynd12	0.464	0.722	0.812	0.666	0.0328173
Actb	0.513	0.456	0.564	0.511	9.67055e-05
Me1	0.503	0.503	0.455	0.487	5.64093e-06
Pfkp	0.519	0.535	0.511	0.521667	2.83576e-07
Ndufs1	0.871	0.803	0.938	0.870667	0.0294152
Mpi	0.513	0.505	0.482	0.5	7.13886e-07
Eef1g	0.494	0.655	0.743	0.630667	0.00714979
Lap3	0.943	0.819	0.757	0.839667	0.0427169
Bag6	0.527	0.615	0.707	0.616333	0.00179421
#VALUE!	0.323	0.329	0.312	0.321333	1.73578e-08
1700025F22Rik	0.469	0.965	1.798	1.07733	0.851642
Acot9	0.613	0.623	0.724	0.653333	0.00061282
Ddt	0.47	0.92	0.648	0.679333	0.0703896
Prkar2a	0.536	0.584	0.625	0.581667	8.35956e-05
Zp3r	0.484	0.565	0.466	0.505	8.37558e-05
Gstm5	0.495	0.411	0.472	0.459333	2.73093e-05
Pdia3	0.471	1.601	0.797	0.956333	0.902811
Sod2	0.822	0.649	0.793	0.754667	0.010135
Uqcrc1	0.729	0.784	0.84	0.784333	0.00253872
Acat1	0.72	0.709	0.653	0.694	0.000122938
Vill	0.473	0.99	1.111	0.858	0.508146
Slc25a3	0.703	0.819	0.828	0.783333	0.00575731
Zan	0.637	0.767	0.729	0.711	0.0017006
Bsg	0.622	0.777	0.832	0.743667	0.0151341
Suclg1	0.617	0.614	0.631	0.620667	2.17984e-07
Ank1	1.224	1.464	1.518	1.402	0.0112543
Gga1	0.475	0.914	0.947	0.778667	0.219394
Sptan1	0.767	0.854	0.9	0.840333	0.0149223
Mcm4	0.476	0.666	1.005	0.715667	0.139957
Iars2	0.657	0.7	0.737	0.698	0.00019814
Psmd2	0.52	0.582	0.606	0.569333	7.34182e-05
Gpd2	0.56	0.623	0.693	0.625333	0.000618845
Ctsd	1.133	0.953	0.944	1.01	0.878823
Letm1	0.883	0.865	0.859	0.869	5.39946e-05
Sccpdh	0.645	0.572	0.539	0.585333	0.000188001
Tm9sf2	1.28	0.952	0.906	1.046	0.715966
Pgam1	0.752	0.867	0.767	0.795333	0.00477116
Man2b2	0.576	0.668	0.638	0.627333	0.000161753
Acrbp	0.555	0.698	0.526	0.593	0.00156447
Mthfd1l	0.824	1.125	1.237	1.062	0.641539
Gm884	0.618	0.714	0.704	0.678667	0.000457346
Cct6a	0.518	0.598	0.563	0.559667	4.50372e-05
Izumo1	0.666	0.742	0.678	0.695333	0.000207269
Rab2a	0.604	0.691	0.64	0.645	0.000148259
Glul	0.826	1.273	0.699	0.932667	0.718591
Cand1	0.708	0.799	0.8	0.769	0.00162973
Eef2	0.706	0.906	0.867	0.826333	0.0470015
Naa25	0.483	0.744	0.762	0.663	0.0201522
Prdx5	0.696	0.75	0.729	0.725	6.26349e-05
Vps13a	0.558	0.634	0.695	0.629	0.000724951
Casc1	0.484	0.769	0.884	0.712333	0.0728029
Usp7	0.54	0.525	0.541	0.535333	9.22094e-08
Acrv1	0.499	0.617	0.536	0.550667	0.000208536
Atp8b3	0.65	0.713	0.724	0.695667	0.000190211
Psma6	0.561	0.634	0.662	0.619	0.000224472
Arrdc5	0.485	0.608	0.572	0.555	0.000260093
Clmn	0.466	0.515	0.517	0.499333	7.33141e-06
Pgrmc1	1.29	0.945	0.897	1.044	0.740187
Vcl	0.849	0.926	0.947	0.907333	0.0358489
Flnb	0.709	0.925	1.123	0.919	0.535226
Acad9	0.821	0.836	0.838	0.831667	6.14682e-06
Uchl5	0.487	0.419	0.774	0.56	0.0155442
Paox	0.487	1.013	1.078	0.859333	0.493996
Golga3	0.487	0.881	1.009	0.792333	0.256673
Fh	0.797	0.851	0.783	0.810333	0.000792233
Tln1	0.784	0.837	0.952	0.857667	0.0454489
Vars	0.593	0.784	0.855	0.744	0.0307227
Vps13b	0.488	0.741	0.927	0.718667	0.0914831
Shtn1	0.488	0.793	0.876	0.719	0.0758091
Erlin2	0.489	0.862	1.053	0.801333	0.2965
Thnsl1	0.573	0.519	0.553	0.548333	8.82714e-06
Bak1	0.49	0.97	1.158	0.872667	0.556846
Psmc5	0.529	0.595	0.646	0.59	0.00026708
Dohh	0.491	0.702	0.962	0.718333	0.107489
Crocc	0.492	0.608	1.024	0.708	0.144893
Cycs	0.9	0.849	0.765	0.838	0.0146586
Eef1d	0.492	0.679	0.933	0.701333	0.079632
Dpp3	0.537	0.631	0.596	0.588	0.000114461
Nudcd1	0.492	0.783	0.996	0.757	0.171532
Ipo5	0.883	1.292	1.221	1.132	0.354538
Uqcrc2	0.813	0.828	0.846	0.829	5.69236e-05
Flna	0.812	0.872	0.937	0.873667	0.0248935
Cul3	0.566	0.642	0.68	0.629333	0.000379978
Ppp1cc	0.515	0.517	0.5	0.510667	8.65962e-08
Aldoc	0.659	0.729	0.719	0.702333	0.000168356
Psmd12	0.52	0.561	0.545	0.542	2.75005e-06
Psmc4	0.491	0.567	0.552	0.536667	3.73503e-05
Ldhb	0.733	0.721	0.798	0.750667	0.000478415
Adam2	0.618	0.756	0.697	0.690333	0.00149628
Grk4	0.496	0.74	0.637	0.624333	0.0060382
Plb1	0.631	0.745	0.75	0.708667	0.00169346
Aldob	0.497	0.625	0.509	0.543667	0.000364287
Ugp2	0.509	0.551	0.526	0.528667	2.67903e-06
Uchl3	0.478	0.551	0.514	0.514333	2.10063e-05
Lrrc37a	0.584	0.718	0.724	0.675333	0.00207374
Cpt2	0.558	0.721	0.674	0.651	0.00196705
Rps27a	0.7	0.705	0.739	0.714667	2.01487e-05
Sod1	0.638	0.685	0.743	0.688667	0.000510225
Tmprss12	0.5	0.729	0.6	0.609667	0.00415742
Il4i1	0.583	0.643	0.616	0.614	2.41606e-05
Psmd3	0.556	0.616	0.68	0.617333	0.000434077
Dpep3	0.505	0.629	0.56	0.564667	0.000264523
Manf	1.219	1.167	0.882	1.08933	0.441804
Atp2a3	0.502	0.731	1.133	0.788667	0.315722
Fahd2a	0.692	0.719	0.727	0.712667	1.09644e-05
Akap12	0.679	0.767	0.729	0.725	0.000418116
Ppp1cb	0.64	0.756	0.715	0.703667	0.000950426
Mxra7	0.502	0.808	0.884	0.731333	0.0828224
Fscb	0.57	0.758	0.802	0.71	0.0151444
Mroh2b	0.444	0.546	0.539	0.509667	0.00011798
Cox5b	0.787	0.686	0.784	0.752333	0.00172119
Uqcrfs1	0.758	0.767	0.79	0.771667	1.79808e-05
Slc6a21	0.504	0.708	0.774	0.662	0.014154
Adh5	0.836	0.876	0.793	0.835	0.00233242
Pdzk1	0.805	0.806	0.709	0.773333	0.00213856
Eno3	0.785	0.614	0.739	0.712667	0.00491494
Tmem256	0.505	0.888	0.94	0.777667	0.180332
Huwe1	0.569	0.655	0.697	0.640333	0.000672157
Psmd4	0.506	0.565	0.669	0.58	0.000914027
Prdx2	1.186	1.649	1.51	1.44833	0.0308321
Dnph1	0.506	0.853	0.854	0.737667	0.0862272
D11Wsu47e	0.506	0.866	0.44	0.604	0.0402813
Pdxdc1	0.82	0.85	0.765	0.811667	0.00163494
Cyc1	0.734	0.8	0.814	0.782667	0.000915551
Dlat	0.73	0.806	0.749	0.761667	0.000476109
Uba1y	0.507	0.662	0.511	0.56	0.000993384
Ptchd3	0.614	0.818	0.713	0.715	0.00840705
Psmc3	0.537	0.555	0.612	0.568	4.41745e-05
Pde1a	0.508	0.609	0.701	0.606	0.0021127
Serpina3n	0.509	1.158	0.983	0.883333	0.579757
Adam6b	0.505	0.676	0.598	0.593	0.001186
Ywhaq	0.829	0.902	0.886	0.872333	0.00449881
Vim	0.708	0.716	1.242	0.888667	0.562811
Ccdc136	0.509	0.776	0.848	0.711	0.0486796
Psmb7	0.51	0.587	0.616	0.571	0.000171016
Ubr4	0.672	0.815	0.787	0.758	0.00522096
Fhl4	0.543	0.583	0.462	0.529333	0.000188939
Spta1	0.888	1.234	1.42	1.18067	0.31091
Gatd3a	0.777	0.836	0.774	0.795667	0.000536034
Idh3a	0.687	0.602	0.782	0.690333	0.00398747
Psma5	0.598	0.66	0.638	0.632	3.49159e-05
Psmd11	0.536	0.543	0.56	0.546333	3.64617e-07
Odf2	0.534	0.604	0.566	0.568	2.84477e-05
Rad23a	0.513	0.624	0.613	0.583333	0.000295164
Tppp3	0.513	1.012	1.019	0.848	0.415519
Abca16	0.513	0.787	0.699	0.666333	0.0144787
Dnah3	0.521	0.605	0.713	0.613	0.00223463
Pgm1	0.74	0.752	0.654	0.715333	0.000767712
Plbd1	0.593	0.666	0.664	0.641	0.000116489
Psmc1	0.531	0.612	0.581	0.574667	5.56851e-05
B4galnt2	1.341	0.917	0.862	1.04	0.804598
Arf1	0.774	0.879	0.776	0.809667	0.00536456
Cpq	0.73	0.915	0.905	0.85	0.066973
Usp5	0.703	0.851	0.859	0.804333	0.0181807
Asah1	1.241	0.924	0.887	1.01733	0.884853
Nmes1	0.69	0.512	0.616	0.606	0.00158316
Bsdc1	0.518	0.868	1.21	0.865333	0.537188
Prkaca	0.598	0.634	0.614	0.615333	3.20707e-06
Spink8	0.843	1.643	1.309	1.265	0.317057
Wfdc3	0.519	1.008	0.801	0.776	0.189114
Hibch	0.702	0.78	0.758	0.746667	0.000400682
Ap1b1	0.695	0.753	0.842	0.763333	0.00520326
Rab14	0.681	0.692	0.665	0.679333	2.1339e-06
Adam6a	0.659	0.675	0.579	0.637667	0.000258962
Naglu	0.641	0.786	0.756	0.727667	0.00351902
Acot10	0.62	0.454	0.654	0.576	0.00236103
Pgd	0.613	0.691	0.688	0.664	0.000192062
Ropn1	0.56	0.667	0.588	0.605	0.000248617
Ide	0.532	0.932	0.72	0.728	0.078158
Epcam	1.259	1.125	0.847	1.077	0.560157
Afg3l2	0.778	0.819	0.798	0.798333	6.96066e-05
Atp6v1a	0.754	0.783	0.759	0.765333	1.25757e-05
Rab11b	0.722	0.687	0.69	0.699667	1.1498e-05
Smpd5	0.521	0.601	0.897	0.673	0.0459533
Mycbp2	0.521	0.713	0.95	0.728	0.093448
Ppp2r1a	0.658	0.763	0.806	0.742333	0.00422761
Thop1	0.628	0.817	0.795	0.746667	0.0132063
Ace3	0.591	0.698	0.678	0.655667	0.000467956
Fam71b	0.55	0.626	0.709	0.628333	0.00126585
Man2c1	0.522	0.661	0.685	0.622667	0.00175479
Krt76	0.523	2.901	1.279	1.56767	0.463763
Txndc2	0.515	0.6	0.597	0.570667	0.000103274
Ppp1r7	0.498	0.612	0.597	0.569	0.000271836
Lgsn	0.523	0.638	0.776	0.645667	0.0083703
Gm17949	0.523	0.704	0.864	0.697	0.037071
Hibadh	0.749	0.784	0.849	0.794	0.00215571
Pdhx	0.692	0.716	0.794	0.734	0.000987216
Akr1b1	0.633	0.61	0.565	0.602667	3.76457e-05
Tspo	0.524	1.082	1.179	0.928333	0.743197
Atp1b3	0.611	0.575	0.597	0.594333	2.65812e-06
Prkar1a	0.595	0.682	0.711	0.662667	0.000637698
Lmbrd1	0.525	0.872	0.857	0.751333	0.0930936
Zpbp2	0.59	0.688	0.622	0.633333	0.00022083
L2hgdh	0.586	0.624	0.67	0.626667	0.000104469
Dnaja4	0.57	0.679	0.644	0.631	0.000328131
Arsa	0.561	0.628	0.551	0.58	6.44088e-05
Psma1	0.56	0.618	0.577	0.585	1.75612e-05
Psmc6	0.538	0.597	0.651	0.595333	0.000243044
Tsc22d1	0.528	0.734	0.798	0.686667	0.018355
Psmc2	0.532	0.595	0.617	0.581333	8.021e-05
Mme	1.165	0.873	1.136	1.058	0.566168
Chdh	0.772	0.875	0.816	0.821	0.00388498
Tarsl2	0.529	0.692	0.838	0.686333	0.0245685
Nipsnap3a	0.753	0.488	0.619	0.62	0.00766627
Ywhab	0.691	0.788	0.842	0.773667	0.00686921
Ahcy	0.598	0.699	0.694	0.663667	0.000513874
Spaca9	0.59	0.733	0.62	0.647667	0.00126705
St13	0.785	0.789	0.731	0.768333	0.000244143
Aldh9a1	0.65	0.738	0.724	0.704	0.000410628
Dynll1	0.62	0.709	0.704	0.677667	0.000366276
Prep	0.596	0.661	0.652	0.636333	5.74347e-05
Eqtn	0.561	0.699	0.657	0.639	0.000904351
Rbx1	0.532	0.694	0.842	0.689333	0.025575
Gapdhs	0.529	0.561	0.534	0.541333	1.31863e-06
Psmc3	0.454	0.496	0.601	0.517	0.000381533
Eci1	0.849	0.928	0.792	0.856333	0.0218963
Prr27	0.533	0.581	0.598	0.570667	2.49928e-05
Idh3b	0.767	0.727	0.772	0.755333	6.73206e-05
Ywhag	0.734	0.802	0.876	0.804	0.00877544
Mecr	0.645	0.767	0.774	0.728667	0.00292574
Uchl5	0.458	0.565	0.601	0.541333	0.000435285
Arhgdia	0.818	0.881	0.9	0.866333	0.00571554
Akap3	0.534	1.139	0.886	0.853	0.449204
Triml1	0.534	0.651	0.727	0.637333	0.00295527
Srgap2	0.534	0.748	0.733	0.671667	0.0089015
Hsd17b10	0.817	0.867	0.765	0.816333	0.00336662
Gm14597	0.535	0.713	0.585	0.611	0.00183498
Alms1	0.535	0.817	0.813	0.721667	0.0406618
H2-Ab1	0.535	0.773	1.234	0.847333	0.498169
Lta4h	0.674	0.681	0.67	0.675	5.73873e-08
Isoc2a	0.601	0.619	0.67	0.63	5.71772e-05
Tppp2	0.577	0.511	0.546	0.544667	1.82243e-05
Lypd4	0.541	0.677	0.657	0.625	0.000901895
Adam3	0.517	0.619	0.585	0.573667	0.0001421
Sdhb	0.879	0.518	0.673	0.69	0.0413542
Pitrm1	0.865	0.768	0.805	0.812667	0.00268755
Gpx5	0.841	1.097	0.91	0.949333	0.54385
Fen1	0.536	0.757	1.163	0.818667	0.37925
Naxd	0.804	0.864	0.835	0.834333	0.000667975
Atp6v1b2	0.687	0.848	0.717	0.750667	0.00726138
Glipr1l1	0.541	0.611	0.512	0.554667	0.000110504
Cd109	0.531	0.611	0.662	0.601333	0.00047259
Gdi1	0.812	0.863	0.807	0.827333	0.000644843
Abhd10	0.659	0.621	0.622	0.634	8.10884e-06
Spag17	0.537	1.035	0.921	0.831	0.324702
Timm44	0.65	0.64	0.682	0.657333	1.11011e-05
Lipe	0.583	0.725	0.686	0.664667	0.00137754
Tex101	0.529	0.647	0.522	0.566	0.000431827
Dhrs4	0.781	0.891	0.738	0.803333	0.0124776
Nup155	0.756	0.871	0.853	0.826667	0.00831857
Gtpbp1	0.538	0.8	0.955	0.764333	0.124865
Nsf	0.743	0.775	0.824	0.780667	0.000740113
Apeh	0.693	0.867	0.92	0.826667	0.0647943
Ggt7	0.539	0.795	0.652	0.662	0.0103133
Znrf1	0.539	0.793	0.821	0.717667	0.0345941
Cisd1	0.647	0.707	0.829	0.727667	0.00705099
Spam1	0.604	0.693	0.668	0.655	0.00020094
Armc4	0.566	0.813	0.779	0.719333	0.0221357
Psma4	0.564	0.587	0.464	0.538333	0.000256814
Inpp1	0.508	0.511	0.512	0.510333	2.17738e-10
Impa1	0.624	0.704	0.827	0.718333	0.00883381
Dynll2	0.623	0.693	0.696	0.670667	0.00015939
Ttc19	0.54	0.693	0.828	0.687	0.0197346
Mfsd6	0.54	0.94	0.88	0.786667	0.161886
Hdac6	0.61	0.877	0.799	0.762	0.0398408
Prdx6b	0.556	0.524	0.48	0.52	2.62538e-05
Glod4	0.857	0.902	0.809	0.856	0.00583521
Aldh7a1	0.836	0.893	0.797	0.842	0.00477776
Acad10	0.747	0.9	0.86	0.835667	0.0230215
Gprc5b	0.541	1.019	0.944	0.834667	0.32772
Nt5m	0.541	0.737	0.634	0.637333	0.00304861
Psma7	0.679	0.822	0.779	0.76	0.00478523
Fabp9	0.677	0.87	0.85	0.799	0.0304887
Adam1b	0.636	0.744	0.629	0.669667	0.000890483
Oxsm	0.628	0.715	0.741	0.694667	0.000867188
Bpnt1	0.625	0.695	0.634	0.651333	9.24221e-05
Akap4	0.625	1.106	0.846	0.859	0.367783
Klhl10	0.543	0.625	0.604	0.590667	7.6323e-05
Cog2	0.542	0.817	0.952	0.770333	0.129667
Armc12	0.542	0.649	0.555	0.582	0.000243141
Acot7	0.474	0.507	0.491	0.490667	7.32976e-07
Hsd17b10	0.844	0.875	0.879	0.866	0.000266287
Dnaja2	0.728	0.824	0.852	0.801333	0.00612374
Me2	0.649	0.688	0.756	0.697667	0.000639805
Gmfg	0.543	0.803	1.276	0.874	0.588579
Idh1	0.623	0.761	0.788	0.724	0.00568694
Izumo4	0.619	0.645	0.63	0.631333	1.04415e-06
Pfkm	0.576	0.57	0.652	0.599333	0.000109732
Actrt3	0.544	0.721	0.783	0.682667	0.0114074
Psma2	0.511	0.53	0.524	0.521667	1.13219e-07
Dbil5	0.504	0.504	0.601	0.536333	0.000137398
Agr2	1.382	1.142	0.579	1.03433	0.892262
Cyb5b	0.791	0.846	0.863	0.833333	0.001553
Hsbp1	0.545	0.736	0.719	0.666667	0.00546407
Nup93	0.784	0.886	0.888	0.852667	0.0127395
Rab5c	0.752	0.839	0.808	0.799667	0.00140952
Xpo1	0.724	0.8	0.788	0.770667	0.000626756
Spag6	0.67	0.862	0.747	0.759667	0.0125648
Smim22	0.547	0.871	1.136	0.851333	0.431987
Herc4	0.547	0.655	0.662	0.621333	0.000525813
Esd	0.666	0.772	0.766	0.734667	0.00151689
Hyal5	0.604	0.738	0.745	0.695667	0.00267964
Naxe	0.593	0.691	0.687	0.657	0.000430412
Ms4a14	0.57	0.671	0.74	0.660333	0.00233758
Prss39	0.465	0.574	0.573	0.537333	0.000215218
Hspe1	0.758	0.786	0.785	0.776333	1.67726e-05
Rars	0.709	0.77	0.747	0.742	0.000131319
Txn2	0.659	1.197	0.819	0.891667	0.534279
Htra2	0.62	0.692	0.698	0.67	0.000192088
Acr	0.617	0.7	0.586	0.634333	0.000425246
Spaca5	0.606	0.634	0.57	0.603333	2.8121e-05
Prmt5	0.571	0.654	0.611	0.612	8.51504e-05
Psmd6	0.567	0.503	0.568	0.546	2.97421e-05
Ppp3cc	0.485	0.557	0.527	0.523	2.17532e-05
Mroh1	0.437	0.505	0.453	0.465	1.28747e-05
Epb41	1.24	1.41	1.374	1.34133	0.00273151
Sltm	0.55	0.764	0.918	0.744	0.0744206
Rspry1	0.55	0.633	0.7	0.627667	0.0010125
Sfpq	1.12	0.903	0.889	0.970667	0.714854
Pmpcb	0.695	0.86	0.829	0.794667	0.0154053
Pmpca	0.693	0.888	0.815	0.798667	0.024023
Nectin2	0.551	0.882	0.805	0.746	0.0639838
Cd37	0.551	0.715	0.861	0.709	0.0313769
Aars	0.681	0.877	0.875	0.811	0.0437842
C3	0.552	0.981	0.858	0.797	0.186681
Get4	0.552	0.6	0.811	0.654333	0.012202
Asrgl1	0.665	0.815	0.7	0.726667	0.00380561
Spaca3	0.65	0.696	0.734	0.693333	0.000226422
Tuba8	0.553	0.793	0.877	0.741	0.0559236
Dera	0.553	0.949	0.667	0.723	0.0782115
1700061G19Rik	0.589	0.707	0.648	0.648	0.000494889
Sssca1	0.583	0.464	0.645	0.564	0.00119957
Hdhd5	0.568	0.585	0.663	0.605333	0.000174533
Atp2b4	0.554	1.043	0.59	0.729	0.16011
Tssk1b	0.565	0.624	0.671	0.62	0.000243757
Prcp	0.555	0.671	0.617	0.614333	0.000325534
Adam5	0.55	0.666	0.52	0.578667	0.000695197
Prss47	0.554	0.648	0.605	0.602333	0.000126743
Hspb11	0.554	0.662	0.737	0.651	0.00277592
Gnpda2	0.521	0.503	0.57	0.531333	1.9735e-05
Psmd13	0.5	0.528	0.57	0.532667	2.12673e-05
Tnks2	0.554	0.622	0.516	0.564	0.000148406
Nln	0.862	0.52	0.796	0.726	0.059058
Aldoart1	0.555	0.743	0.689	0.662333	0.00378404
Sardh	0.832	1.222	0.852	0.968667	0.816987
Stxbp2	0.66	0.698	0.732	0.696667	0.000128483
Gm4787	0.597	0.683	0.642	0.640667	0.000132652
Adam4	0.589	0.693	0.549	0.610333	0.00081569
Slc16a7	0.589	0.722	0.722	0.677667	0.00190097
Art3	0.574	0.699	0.625	0.632667	0.000536038
Trim69	0.56	0.707	0.803	0.69	0.011809
Ranbp17	0.555	0.64	0.703	0.632667	0.00101979
Psma8	0.511	0.49	0.52	0.507	6.32524e-07
Kif5b	0.867	0.871	0.871	0.869667	6.56722e-08
Cbr1	0.811	0.872	0.831	0.838	0.000835511
Atp6v1h	0.775	0.796	0.817	0.796	7.31319e-05
Nup205	0.763	0.852	0.928	0.847667	0.0330623
Csnk2a2	0.753	0.874	0.839	0.822	0.00775317
Gclc	0.717	0.842	0.838	0.799	0.00804113
Acsbg2	0.618	0.664	0.78	0.687333	0.00291149
Mrpl38	0.556	0.89	0.297	0.581	0.0711199
Uba6	0.598	0.682	0.632	0.637333	0.000119214
Ppp1r2	0.594	0.615	0.464	0.557667	0.000723611
G6pd2	0.516	0.465	0.409	0.463333	6.45059e-05
Ppm1b	0.509	0.568	0.639	0.572	0.00033904
Actl7a	0.557	0.526	0.621	0.568	0.000102556
Nadsyn1	0.557	0.724	0.77	0.683667	0.00811114
Ca1	1.523	1.435	1.752	1.57	0.00380507
9230104L09Rik	1.331	0.795	0.933	1.01967	0.90849
Fkbp2	1.197	1.076	0.855	1.04267	0.691937
Plin3	0.891	0.892	0.787	0.856667	0.0146758
Apoh	0.886	0.935	0.806	0.875667	0.0297348
Prss21	0.812	0.742	0.59	0.714667	0.0121148
Zdhhc11	0.558	0.64	0.727	0.641667	0.00183053
Scamp1	0.722	0.817	0.761	0.766667	0.00106812
Dnajc13	0.698	0.755	0.783	0.745333	0.000523869
Sdr39u1	0.559	0.941	0.675	0.725	0.07182
Fam162a	0.696	0.758	0.739	0.731	0.000125702
Mtfp1	0.559	0.913	1.016	0.829333	0.285032
Psma3	0.555	0.533	0.606	0.564667	3.591e-05
Itgb3	0.559	1.03	0.837	0.808667	0.234201
Psmb5	0.547	0.614	0.589	0.583333	2.86437e-05
Armt1	0.546	0.708	0.609	0.621	0.0013
Ly6e	1.677	1.656	2.001	1.778	0.00223094
Wdr1	0.777	0.891	0.897	0.855	0.0205768
Nit1	0.732	0.739	0.686	0.719	7.18005e-05
Prps1l3	0.694	0.638	0.677	0.669667	3.74153e-05
Spaca4	0.678	0.792	0.75	0.74	0.00144981
Gldc	0.652	1.142	1.553	1.11567	0.679912
Slc22a21	0.616	0.753	0.757	0.708667	0.00327162
Psmb4	0.577	0.525	0.494	0.532	4.22421e-05
Spg20	0.56	0.742	0.753	0.685	0.0073154
Samd9l	0.56	0.839	1.034	0.811	0.241384
Cabyr	0.575	0.731	0.712	0.672667	0.00263849
Phpt1	0.534	0.638	0.621	0.597667	0.000236268
Copb2	0.91	0.91	0.942	0.920667	0.00174516
Ubxn4	0.86	0.907	0.79	0.852333	0.0122128
#VALUE!	0.561	0.733	0.558	0.617333	0.00270623
Rnpep	0.674	0.847	0.773	0.764667	0.00933655
Ttc39d	0.657	0.709	0.75	0.705333	0.000395066
Eif2b1	0.562	0.896	1.017	0.825	0.267775
Chchd7	0.562	0.876	0.764	0.734	0.0443316
Fam234a	0.563	0.898	1.011	0.824	0.260853
Psd3	0.563	0.719	0.671	0.651	0.00163617
Akap13	0.563	0.842	0.699	0.701333	0.020692
Kcnu1	0.563	0.68	0.844	0.695667	0.0202197
Nol3	0.563	1.136	0.723	0.807333	0.322141
Nup210l	0.556	0.658	0.624	0.612667	0.000207149
Catsperg2	0.563	0.918	1.151	0.877333	0.512713
Prps1l1	0.488	0.595	0.508	0.530333	0.00013894
Sec31a	0.903	0.929	0.906	0.912667	0.000442736
Sppl2b	0.564	0.963	0.863	0.796667	0.165049
Dis3l2	0.564	0.963	0.737	0.754667	0.100916
Acsl3	0.88	0.785	0.905	0.856667	0.0172293
Actrt2	0.564	0.581	0.669	0.604667	0.000263356
Txnrd2	0.823	0.839	0.897	0.853	0.00282613
Ube2l3	0.783	0.858	0.919	0.853333	0.0203107
Clpp	0.782	0.837	0.807	0.808667	0.00027336
Ppa1	0.743	0.92	0.683	0.782	0.037499
Defb22	0.678	0.819	0.632	0.709667	0.00669387
Cse1l	0.677	0.716	0.707	0.7	1.41657e-05
Pa2g4	0.669	0.895	0.835	0.799667	0.0413924
Ndufaf2	0.622	0.77	0.771	0.721	0.00487673
Uba5	0.566	1.159	0.916	0.880333	0.525152
Shc1	0.566	0.695	0.901	0.720667	0.0457735
Pebp4	0.587	0.642	0.573	0.600667	4.5549e-05
Lyzl4	0.586	0.725	0.714	0.675	0.00188708
Glb1l	0.576	0.686	0.613	0.625	0.00031514
Tars2	0.567	0.817	0.852	0.745333	0.0469668
Appl2	0.567	0.765	1.036	0.789333	0.196128
Pfn5	0.567	0.398	0.593	0.519333	0.00141363
Tssk4	0.539	0.571	0.503	0.537667	1.93107e-05
Tom1	0.534	0.572	0.629	0.578333	0.000107152
Ube3a	0.514	0.54	0.575	0.543	1.32863e-05
Dhrs1	0.801	0.86	0.797	0.819333	0.00089196
Myl12b	0.568	0.854	0.963	0.795	0.156743
Cox7a2	0.775	0.61	0.752	0.712333	0.00507231
Gadd45gip1	0.568	0.976	1.011	0.851667	0.355759
Fam3d	0.568	0.842	0.761	0.723667	0.0272724
Eif3c	0.773	0.925	0.932	0.876667	0.0761867
Orm1	0.568	0.876	0.929	0.791	0.136869
Akr1c19	0.737	0.896	0.89	0.841	0.037806
Spa17	0.621	0.663	0.747	0.677	0.000952581
Catsper2	0.569	0.87	0.922	0.787	0.124971
Rpap3	0.569	0.824	0.9	0.764333	0.0781475
Gnpat	0.603	0.673	0.644	0.64	5.94678e-05
Ppm1a	0.579	0.69	0.687	0.652	0.000676518
Oplah	0.551	0.665	0.661	0.625667	0.000557243
Sgta	0.461	0.5	0.481	0.480667	1.32158e-06
Spag11	1.47	1.72	0.577	1.25567	0.502038
Gm2a	0.773	0.649	0.671	0.697667	0.00137887
#VALUE!	0.57	0.706	0.899	0.725	0.0449612
Tbata	0.57	0.7	0.878	0.716	0.0334929
Syngr2	0.57	0.738	1.251	0.853	0.512631
Apoo	0.754	0.69	0.728	0.724	0.000119668
Macrod1	0.728	0.794	0.702	0.741333	0.000700304
#VALUE!	0.697	0.639	0.709	0.681667	0.000123661
Farsa	0.687	0.809	0.853	0.783	0.0119643
Nsfl1c	0.677	0.773	0.771	0.740333	0.00120585
Psmf1	0.571	0.844	1.057	0.824	0.279008
Eps15	0.626	0.729	0.833	0.729333	0.0105811
Bcas2	0.572	0.619	0.803	0.664667	0.0089214
Psmb1	0.617	0.656	0.603	0.625333	1.90233e-05
Aldh1a2	0.612	0.653	0.539	0.601333	0.000280225
Ptpa	0.589	0.57	0.594	0.584333	5.72902e-07
Npepps	0.583	0.711	0.671	0.655	0.000800109
Pgls	0.57	0.665	0.689	0.641333	0.000590835
Bag5	0.566	0.645	0.749	0.653333	0.00282186
Sec61g	0.573	0.795	1.025	0.797667	0.195938
Pdlim5	0.573	0.843	0.892	0.769333	0.0806289
Anxa9	0.573	0.838	0.815	0.742	0.0382569
Acaca	0.562	0.657	0.708	0.642333	0.00111909
Nagk	0.545	0.629	0.628	0.600667	0.000137159
Pla2g6	0.485	0.614	0.621	0.573333	0.000644947
Hdlbp	0.853	0.882	1.086	0.940333	0.461396
Xpnpep3	0.847	0.738	0.825	0.803333	0.004104
Aldoa	0.574	0.775	0.695	0.681333	0.00549081
Apool	0.832	0.864	0.828	0.841333	0.000154109
Rnase9	0.82	1.172	0.754	0.915333	0.549627
Ddb1	0.768	0.858	0.844	0.823333	0.00320957
Pnpla8	0.765	0.855	0.801	0.807	0.00179744
Nadk2	0.739	0.909	0.838	0.828667	0.0254538
Ido1	0.734	1.174	0.667	0.858333	0.423325
Tex29	0.575	0.966	0.985	0.842	0.302487
F12	0.575	0.924	0.683	0.727333	0.0573874
Piezo1	0.575	0.881	0.967	0.807667	0.18121
Synj1	0.575	0.726	0.908	0.736333	0.0519646
Ppef1	0.723	0.625	0.673	0.673667	0.000322636
Nup54	0.705	0.791	0.861	0.785667	0.00896354
Txnrd3	0.694	0.815	0.876	0.795	0.0185694
Senp8	0.576	0.78	0.802	0.719333	0.0175268
Lars	0.688	0.849	0.888	0.808333	0.0351429
Serpinb6	0.667	0.718	0.69	0.691667	3.09152e-05
Efr3a	0.645	0.673	0.728	0.682	0.000199377
Blmh	0.601	0.738	0.676	0.671667	0.00115615
Pitpna	0.596	0.576	0.673	0.615	0.000200805
Camk4	0.555	0.634	0.562	0.583667	7.9195e-05
Psmd8	0.554	0.619	0.596	0.589667	2.73581e-05
Psmd14	0.524	0.537	0.614	0.558333	9.55134e-05
Nrbp1	0.577	0.876	0.802	0.751667	0.0507411
Krt5	0.523	3.115	1.331	1.65633	0.439684
Defb20	1.569	1.208	0.644	1.14033	0.62964
Csnk1a1	0.8	0.83	0.56	0.73	0.0341804
Dnah7c	0.578	0.688	0.855	0.707	0.0219918
Cnot1	0.578	0.858	0.999	0.811667	0.202605
F8a	0.578	0.757	0.938	0.757667	0.0800904
Ncstn	0.785	0.857	0.866	0.836	0.00306405
Mycbp	0.778	0.836	0.839	0.817667	0.000780474
Slc25a20	0.775	0.753	0.887	0.805	0.00930809
Lancl1	0.727	0.929	0.878	0.844667	0.0625551
Snap23	0.695	0.793	0.76	0.749333	0.000958044
Bpifa3	0.58	0.683	0.712	0.658333	0.00103618
Gars	0.68	0.757	0.752	0.729667	0.000406908
Sugt1	0.666	0.818	0.703	0.729	0.00407382
Pfdn4	0.581	0.777	0.818	0.725333	0.0198465
Bpi	0.627	0.685	0.626	0.646	5.41665e-05
Capza3	0.581	0.938	0.765	0.761333	0.081538
Osbpl2	0.581	0.884	1.154	0.873	0.485655
Vps13d	0.581	0.845	0.911	0.779	0.0934729
Gm20671	0.581	0.799	0.854	0.744667	0.0375468
Nampt	0.625	0.715	0.61	0.65	0.000436221
Tubb3	0.582	1.086	1.212	0.96	0.845517
Dlg2	0.582	0.694	0.633	0.636333	0.000357724
Txnrd1	0.623	0.751	0.813	0.729	0.0083731
Usp4	0.597	0.692	0.651	0.646667	0.000211836
Abcb8	0.582	0.792	0.908	0.760667	0.0661526
Bub3	0.582	0.709	0.975	0.755333	0.102143
Dnali1	0.592	0.751	0.766	0.703	0.00594468
Ccdc105	0.582	0.586	0.543	0.570333	6.18741e-06
Gm9774	0.5	0.534	0.622	0.552	0.000249023
Atp6v1e2	0.477	0.603	0.601	0.560333	0.000456466
Ppp4r1	0.448	0.528	0.477	0.484333	2.50246e-05
Ssbp1	0.84	0.925	0.895	0.886667	0.010389
2810408A11Rik	0.818	0.836	0.792	0.815333	0.000132997
Nit2	0.744	0.84	0.777	0.787	0.00163755
#VALUE!	0.583	1.009	0.867	0.819667	0.22329
Them4	0.727	0.791	0.601	0.706333	0.00624769
Rxylt1	0.583	0.768	0.857	0.736	0.0307482
Uchl1	0.68	0.769	0.691	0.713333	0.00051402
Cd46	0.661	0.751	0.641	0.684333	0.000734317
Dnpep	0.584	0.716	0.845	0.715	0.019393
Xpo7	0.657	0.795	0.805	0.752333	0.00657774
Ubqln1	0.655	0.806	0.695	0.718667	0.00338378
Rabep2	0.642	0.749	0.77	0.720333	0.00212715
Slc9b1	0.632	0.718	0.722	0.690667	0.000458774
Fbxo7	0.584	0.862	0.814	0.753333	0.045234
Tiprl	0.584	0.884	0.774	0.747333	0.0448519
Birc6	0.584	0.786	0.872	0.747333	0.0415493
Serpinb2	0.584	0.727	1.41	0.907	0.733662
Pkm	0.585	0.78	0.611	0.658667	0.00504476
Shmt1	0.597	0.633	0.615	0.615	3.16993e-06
Bag1	0.521	0.524	0.483	0.509333	3.12296e-06
Ehd2	0.585	0.975	0.867	0.809	0.17575
Igbp1b	0.493	0.505	0.56	0.519333	2.00978e-05
Cul2	0.585	0.808	0.659	0.684	0.00853067
Rab3gap1	0.585	0.88	1.34	0.935	0.782041
Appl1	0.586	0.654	0.699	0.646333	0.000421766
Psmb2	0.484	0.702	0.7	0.628667	0.00682204
Psmb6	0.475	0.545	0.572	0.530667	8.41703e-05
Rtcb	0.858	0.895	0.875	0.876	0.000315924
Atp6v1c1	0.854	0.916	0.835	0.868333	0.00575421
Cdiptos	0.586	0.718	0.763	0.689	0.00424482
Slc31a2	0.586	0.813	0.622	0.673667	0.00978557
Vtn	0.844	0.919	0.917	0.893333	0.0124166
Lgals1	0.815	0.882	1.142	0.946333	0.61903
Timm50	0.745	0.782	0.792	0.773	9.19034e-05
Acp6	0.742	0.786	0.794	0.774	0.000151858
Csnk1g2	0.709	0.68	0.663	0.684	1.9335e-05
Kpna6	0.587	0.787	0.913	0.762333	0.0664781
Catsper4	0.587	0.804	0.877	0.756	0.048724
Gmps	0.587	0.954	0.98	0.840333	0.276716
Carm1	0.587	0.627	0.697	0.637	0.000350457
Mpc2	0.708	0.667	0.718	0.697667	4.18153e-05
Als2	0.587	0.72	0.634	0.647	0.000820741
Cmpk1	0.706	0.766	0.695	0.722333	0.000229433
Rad23b	0.702	0.706	0.778	0.728667	0.000389829
Ap1g1	0.688	0.743	0.706	0.712333	5.89452e-05
Slc30a1	0.625	0.709	0.698	0.677333	0.00025571
Hebp2	0.588	0.98	0.772	0.78	0.12396
Nudcd3	0.588	0.905	0.794	0.762333	0.062695
Glipr1l3	0.622	0.729	0.654	0.668333	0.000472117
Lyzl1	0.62	0.699	0.497	0.605333	0.00256022
Adam24	0.607	0.674	0.697	0.659333	0.000227016
Gsr	0.591	0.777	0.829	0.732333	0.0207433
Crisp2	0.586	0.613	0.548	0.582333	2.45753e-05
Lyzl6	0.584	0.663	0.555	0.600667	0.000245135
Flad1	0.584	0.652	0.691	0.642333	0.000333132
Naa50	0.589	0.937	1.037	0.854333	0.343738
Rab4b	0.544	0.555	0.616	0.571667	4.40147e-05
Mmel1	0.537	0.68	0.601	0.606	0.000677772
Map1b	0.822	1.145	0.826	0.931	0.554162
Bdh1	0.763	0.813	0.764	0.78	0.000183039
Pdcd5	0.702	0.74	0.811	0.751	0.00146094
Tamm41	0.59	0.698	0.754	0.680667	0.00267764
Lypd9	0.59	0.765	0.822	0.725667	0.0170994
Adss	0.7	0.592	0.741	0.677667	0.00191799
Oxr1	0.689	0.767	0.82	0.758667	0.00316338
Ppp5c	0.686	0.792	0.744	0.740667	0.00106848
Plaa	0.682	0.789	0.726	0.732333	0.000995493
Skp1	0.67	0.775	0.777	0.740667	0.00183549
Fkbp1a	0.645	0.776	0.82	0.747	0.00856196
Psme4	0.639	0.901	0.872	0.804	0.0773569
Plbd2	0.635	0.696	0.619	0.65	0.000117553
Satl1	0.627	0.672	0.732	0.677	0.000445021
Adam34	0.608	0.692	0.681	0.660333	0.000209119
Thtpa	0.592	0.48	0.861	0.644333	0.0346484
Stx12	0.607	0.628	0.649	0.628	6.72272e-06
Hk1-SB	0.593	0.806	0.944	0.781	0.0985218
Pdpr	0.585	0.603	0.702	0.63	0.000526004
Rabggta	0.573	0.635	0.678	0.628667	0.000260414
Pde8a	0.567	0.595	0.579	0.580333	8.34855e-07
Acsl6	0.593	0.773	1.127	0.831	0.341936
4930544G11Rik	0.56	0.461	0.437	0.486	0.000166597
Amdhd2	0.52	0.607	0.622	0.583	0.000195191
#VALUE!	0.593	0.722	0.798	0.704333	0.00780871
Cutc	0.46	0.549	0.55	0.519667	8.70524e-05
4922502D21Rik	0.457	0.6	0.597	0.551333	0.000682245
Spata18	0.404	0.561	0.529	0.498	0.000468532
Ndufa8	1.229	0.928	0.871	1.00933	0.937063
Klc4	0.594	0.829	0.888	0.770333	0.0627955
Ggh	0.806	0.888	0.775	0.823	0.00629403
Cct8	0.595	0.377	0.855	0.609	0.0473466
9230113P08Rik	0.785	0.743	0.563	0.697	0.0112458
Gamt	0.595	1.109	0.827	0.843667	0.352172
Auh	0.774	0.856	0.772	0.800667	0.00196879
Immp1l	0.595	0.648	0.704	0.649	0.000367759
Cwh43	0.772	1.172	1.414	1.11933	0.558465
Vps41	0.595	0.856	0.836	0.762333	0.0471583
Fahd1	0.743	0.783	0.753	0.759667	3.69055e-05
Gpx4	0.738	0.695	0.756	0.729667	0.000116941
Wnk1	0.596	0.817	0.846	0.753	0.0352275
Mrps28	0.596	1.004	0.808	0.802667	0.169241
Lancl2	0.722	0.818	0.883	0.807667	0.0146968
Prkcd	0.596	0.767	0.77	0.711	0.00735669
Cnot3	0.596	0.78	0.645	0.673667	0.00404903
Kars	0.681	0.896	0.872	0.816333	0.0540848
Ado	0.647	0.802	0.825	0.758	0.0123547
Adam32	0.628	0.715	0.699	0.680667	0.000281507
Itgb2	0.618	0.781	1.506	0.968333	0.913221
Gm4763	0.568	0.65	0.578	0.598667	0.000100145
Fam71a	0.568	0.642	0.665	0.625	0.000213739
Tex44	0.55	0.732	0.678	0.653333	0.00301939
Hdhd2	0.542	0.639	0.611	0.597333	0.000152281
Psmd7	0.536	0.658	0.672	0.622	0.000939321
Myo9b	0.598	0.881	0.772	0.750333	0.0387973
4933415F23Rik	0.48	0.552	0.53	0.520667	2.30989e-05
Atpaf1	0.598	0.96	0.89	0.816	0.172294
Prss52	0.47	0.555	0.5	0.508333	3.87338e-05
1700080E11Rik	0.444	0.548	0.564	0.518667	0.000215015
Spag6	0.599	0.801	0.883	0.761	0.0472416
Zbtb8os	0.599	0.78	0.918	0.765667	0.0641842
Cpne3	0.867	0.869	1.223	0.986333	0.913621
Csnk2b	0.836	0.887	0.767	0.83	0.00810685
Hprt1	0.821	0.856	0.89	0.855667	0.00192554
Epb41l2	0.803	0.835	0.872	0.836667	0.00120908
Stub1	0.755	0.772	0.72	0.749	8.099e-05
Cavin1	0.729	0.776	1.225	0.91	0.599586
Ube2k	0.601	0.849	1.071	0.840333	0.304732
Drc3	0.601	0.85	0.861	0.770667	0.0540132
Wwp2	0.601	0.733	0.886	0.74	0.0342702
Dpy19l1	0.601	0.639	0.757	0.665667	0.00205815
Catspere	0.601	0.792	0.876	0.756333	0.0401486
Aimp1	0.715	0.828	0.849	0.797333	0.00821643
Smpd4	0.709	0.787	0.832	0.776	0.00337257
Ngly1	0.677	0.769	0.795	0.747	0.00211421
Alox15	0.664	0.655	1.581	0.966667	0.918813
Ndufaf3	0.602	0.803	0.956	0.787	0.106266
Slc2a3	0.603	0.923	2.029	1.185	0.690522
Sars	0.603	0.933	0.831	0.789	0.0965647
Arhgdib	0.64	0.823	1.28	0.914333	0.675929
Hint1	0.634	0.802	0.606	0.680667	0.0064379
Srsf2	0.603	0.773	1.344	0.906667	0.698443
Cd55	0.619	0.859	0.559	0.679	0.0248422
Sypl	0.591	0.597	0.626	0.604667	3.33317e-06
Angel2	0.588	0.628	0.611	0.609	4.60545e-06
Gss	0.604	0.73	0.851	0.728333	0.0189437
Pank2	0.604	0.791	0.912	0.769	0.0614299
Uap1	0.604	0.79	0.725	0.706333	0.00573598
Ptgr2	0.587	0.628	0.505	0.573333	0.000295209
Tcp11	0.584	0.86	0.87	0.771333	0.071199
Aldh16a1	0.583	0.66	0.68	0.641	0.000264081
Acyp2	0.605	0.861	0.889	0.785	0.0760461
Cpt1b	0.571	0.635	0.61	0.605333	2.93031e-05
Psmb3	0.56	0.545	0.625	0.576667	6.63834e-05
Eif6	0.548	0.56	0.654	0.587333	0.000249886
Crlf3	0.605	1.146	1.081	0.944	0.759097
Hook3	0.605	0.86	1.132	0.865667	0.427181
Ubxn11	0.546	0.543	0.704	0.597667	0.00163547
5730455P16Rik	0.605	1.055	0.699	0.786333	0.193985
Srpk2	0.542	0.668	0.618	0.609333	0.000437776
Mgat4b	0.606	0.685	0.978	0.756333	0.0976104
Cdc42bpb	0.606	0.722	0.779	0.702333	0.00426426
Scamp2	0.536	0.737	0.593	0.622	0.00320631
Mon2	0.606	0.793	0.934	0.777667	0.0793379
Prss54	0.517	0.607	0.598	0.574	0.000118611
Sccpdh	0.501	0.411	0.349	0.420333	0.000193921
Hsph1	0.607	0.898	0.972	0.825667	0.192653
Hpx	0.607	1.042	0.802	0.817	0.219435
Dnah17	0.607	0.85	0.897	0.784667	0.0746613
Cpa5	0.483	0.596	0.574	0.551	0.00020318
Stk33	0.483	0.503	0.441	0.475667	8.77262e-06
Ceacam2	0.607	0.737	1.004	0.782667	0.136427
1700034I23Rik	0.48	0.562	0.613	0.551667	0.000318468
Smcp	0.468	0.456	0.444	0.456	1.57677e-07
Ctps1	0.462	0.658	0.548	0.556	0.00143806
Fam71e2	0.608	0.654	0.708	0.656667	0.000287434
Samd15	0.608	0.711	0.659	0.659333	0.000331212
Vamp3	0.609	0.617	0.848	0.691333	0.0169781
Nudt2	0.609	0.883	0.808	0.766667	0.0462017
Aqp7	0.609	0.779	0.879	0.755667	0.036212
Kif13b	0.609	1.062	0.888	0.853	0.327632
Cox6b2	0.719	0.524	0.554	0.599	0.00270804
Pgam5	0.715	0.692	0.747	0.718	6.00839e-05
Cops3	0.709	0.763	0.777	0.749667	0.000269752
Dpep1	0.692	0.751	0.763	0.735333	0.000270897
Tpm3-rs7	0.61	0.865	1.062	0.845667	0.303536
Cryz	0.61	0.842	0.722	0.724667	0.0147283
Tmem56	0.61	0.652	0.678	0.646667	5.80661e-05
Timm17b	0.61	0.744	0.773	0.709	0.00440441
Padi4	0.61	0.628	1.247	0.828333	0.458362
Immp2l	0.61	0.712	0.817	0.713	0.00863103
Nutf2	0.655	0.685	0.677	0.672333	3.35157e-06
Nploc4	0.641	0.792	0.754	0.729	0.00393958
Slc22a16	0.623	0.764	0.729	0.705333	0.00224987
Zfyve27	0.611	0.881	1.186	0.892667	0.553336
Ubxn6	0.617	0.791	0.77	0.726	0.00750791
Echdc1	0.615	0.705	0.648	0.656	0.000196858
Ppp1r11	0.589	0.678	0.62	0.629	0.00014188
Plcd4	0.573	0.714	0.669	0.652	0.00111475
Ssna1	0.55	0.734	0.732	0.672	0.00578095
Fabp4	1.334	0.426	1.568	1.10933	0.769269
Mpp1	1.214	1.723	1.766	1.56767	0.0328288
Sptlc1	0.612	0.89	1.016	0.839333	0.249456
Tnks1bp1	0.612	0.852	1.012	0.825333	0.207344
Anxa6	0.613	1.005	1.275	0.964333	0.861799
Nmnat3	0.773	0.917	0.815	0.835	0.0181598
Catsperd	0.613	0.845	1.128	0.862	0.40652
Epp13	0.771	1.271	1.151	1.06433	0.691433
Dnal1	0.753	0.82	0.842	0.805	0.00188616
Slc30a9	0.726	0.903	0.81	0.813	0.0216139
Arih1	0.614	0.709	0.719	0.680667	0.000673047
Pgs1	0.707	0.837	0.866	0.803333	0.0158285
Dnai2	0.614	0.783	0.839	0.745333	0.0196768
Ube2j2	0.614	0.893	0.863	0.79	0.0764129
Rpgr	0.614	0.781	0.819	0.738	0.0141317
Prss46	0.701	0.815	0.646	0.720667	0.00495105
Dmac2l	0.676	0.59	0.594	0.62	0.000171214
Anp32b	0.615	0.951	0.753	0.773	0.0804289
Dcaf6	0.615	0.807	0.847	0.756333	0.0272025
Fam205c	0.615	0.814	0.736	0.721667	0.00859889
Rdh14	0.662	0.739	0.775	0.725333	0.00118225
Wdr61	0.616	0.898	0.9	0.804667	0.107153
Acsl6	0.623	0.722	0.758	0.701	0.00177138
#VALUE!	0.616	0.849	0.921	0.795333	0.0902531
Fastkd2	0.616	0.672	0.887	0.725	0.0291219
Wdr77	0.601	0.66	0.541	0.600667	0.000312987
Krt2	0.617	2.108	1.288	1.33767	0.477278
Slc8a2	0.601	0.707	0.738	0.682	0.00155579
Uba3	0.578	0.751	0.726	0.685	0.00429931
Kyat1	0.574	0.621	0.65	0.615	6.42353e-05
Efcab1	0.574	0.794	0.718	0.695333	0.00915366
Itih4	0.617	1.045	0.907	0.856333	0.318249
Hspbp1	0.558	0.666	0.615	0.613	0.000242635
Rsu1	0.617	0.8	1.25	0.889	0.586786
Stat5a	0.617	0.869	1.186	0.890667	0.542902
Mtx3	0.617	0.722	0.806	0.715	0.00645865
Prxl2b	0.617	1.223	0.853	0.897667	0.592856
Slc13a5	0.558	0.682	0.662	0.634	0.000679062
Prpsap2	0.555	0.667	0.67	0.630667	0.000617489
Gsk3a	0.55	0.672	0.609	0.610333	0.000379726
Ecpas	0.618	0.784	0.943	0.781667	0.0805176
Faf1	0.53	0.77	0.711	0.670333	0.0102938
Ctbp2	0.618	0.854	0.708	0.726667	0.0164702
Pym1	0.618	1.008	0.958	0.861333	0.320975
Fbxl4	0.618	0.839	1.127	0.861333	0.399979
Atxn3	0.492	0.618	0.62	0.576667	0.000562206
Scamp2	0.619	0.588	0.75	0.652333	0.0021888
Ppp3r2	0.483	0.463	0.446	0.464	9.47734e-07
Tmem177	0.619	0.692	0.74	0.683667	0.000846528
Scyl2	0.619	0.779	0.845	0.747667	0.0197608
Arhgef12	0.619	0.622	0.759	0.666667	0.00195274
Gak	0.619	0.719	0.809	0.715667	0.00659902
Syap1	0.849	0.886	0.8	0.845	0.00339457
Amacr	0.832	0.838	0.808	0.826	4.53443e-05
Higd1a	0.802	0.659	0.838	0.766333	0.0129026
Abracl	0.62	0.743	0.899	0.754	0.0381298
Ormdl1	0.62	0.913	0.929	0.820667	0.148731
Rabep1	0.62	0.718	0.779	0.705667	0.00314105
Plscr3	0.62	0.858	0.935	0.804333	0.107987
Letm2	0.62	0.558	0.696	0.624667	0.000712151
Rae1	0.752	0.824	0.764	0.78	0.000589279
Adam18	0.621	0.874	0.702	0.732333	0.0229954
Cops7a	0.621	0.788	0.948	0.785667	0.0856912
Tmem249	0.621	0.725	0.891	0.745667	0.0318306
Abcc3	0.621	0.911	0.863	0.798333	0.0879212
Atp6v1d	0.734	0.741	0.804	0.759667	0.000417301
Vps4b	0.621	0.888	0.931	0.813333	0.126526
Setd3	0.621	0.69	0.851	0.720667	0.0148624
Tbc1d10b	0.621	1.054	0.985	0.886667	0.446305
Trdc	0.621	0.356	0.457	0.478	0.00249725
Coro1a	0.719	0.816	1.251	0.928667	0.685287
Dnajb6	0.71	0.814	0.843	0.789	0.00640248
Anxa4	0.622	1.015	1.276	0.971	0.886121
Gstt2	0.65	0.776	0.755	0.727	0.00218673
Ppp6c	0.641	0.709	0.691	0.680333	9.57773e-05
Relch	0.622	0.671	0.798	0.697	0.00445695
Eno4	0.622	0.75	0.816	0.729333	0.00895213
Trim36	0.622	0.937	1.152	0.903667	0.5653
Cog8	0.622	0.898	0.974	0.831333	0.189886
Gykl1	0.612	0.706	0.82	0.712667	0.00878847
Tmco2	0.611	0.718	0.654	0.661	0.000401462
Tssk2	0.591	0.752	0.788	0.710333	0.00875791
Sh3gl3	0.559	0.734	0.745	0.679333	0.00599654
Enoph1	0.55	0.769	0.697	0.672	0.00703289
Idi1	0.549	0.857	0.762	0.722667	0.0381931
4930435E12Rik	0.545	0.65	0.681	0.625333	0.000807175
Dcun1d1	0.541	0.641	0.66	0.614	0.000472443
Rsph9	0.623	1.095	0.955	0.891	0.479607
Pdcd4	0.623	0.983	0.818	0.808	0.138729
Ghitm	0.623	0.834	0.823	0.76	0.0248986
Prss55	0.536	0.503	0.484	0.507667	5.40444e-06
Pts	0.623	0.902	0.888	0.804333	0.0973302
Pudp	0.532	0.553	0.467	0.517333	4.8705e-05
Dnajc5b	0.524	0.48	0.572	0.525333	5.76656e-05
Glmn	0.52	0.585	0.663	0.589333	0.000576479
Phospho1	0.52	0.547	0.54	0.535667	5.51695e-07
Stk11	0.624	0.723	0.647	0.664667	0.000360562
Slc26a8	0.488	0.598	0.59	0.558667	0.000238295
Tbl1xr1	0.624	0.811	0.879	0.771333	0.0399652
Ca3	3.282	0.371	1.943	1.86533	0.361775
Gstz1	0.83	0.834	0.727	0.797	0.00440338
Naca	0.809	0.842	0.923	0.858	0.0137751
Pycard	0.793	1.366	1.302	1.15367	0.444355
Srpk1	0.625	0.792	0.721	0.712667	0.00403293
Nat2	0.625	0.977	1.448	1.01667	0.947622
Slc44a1	0.625	0.919	0.773	0.772333	0.0550854
Capns1	0.772	0.845	0.766	0.794333	0.00126305
Prdx4	0.626	0.954	0.969	0.849667	0.250337
Arfgef1	0.763	0.783	0.798	0.781333	2.73289e-05
Ap2s1	0.626	0.877	0.915	0.806	0.099119
Lrrc23	0.626	0.824	0.714	0.721333	0.00824703
Iba57	0.761	0.752	0.888	0.800333	0.0104402
Rpia	0.742	0.721	0.788	0.750333	0.00022703
Cmpk2	0.731	0.906	1.143	0.926667	0.572253
Mars	0.722	0.863	0.857	0.814	0.0155961
Cops5	0.706	0.85	0.853	0.803	0.0153334
Pafah1b3	0.627	1.068	0.992	0.895667	0.486103
Atg4b	0.627	0.799	0.859	0.761667	0.0265842
Fmr1nb	0.627	0.702	0.67	0.666333	0.000104908
Fam187a	0.627	0.879	0.79	0.765333	0.0335209
Hook1	0.699	0.746	0.809	0.751333	0.00145507
Tatdn1	0.627	0.595	0.623	0.615	2.79149e-06
Ropn1l	0.679	0.881	0.71	0.756667	0.0179282
Micos13	0.676	0.722	0.679	0.692333	3.21379e-05
Cct3	0.628	0.694	0.703	0.675	0.000162283
Ykt6	0.658	0.799	0.797	0.751333	0.00597264
Gsto2	0.658	0.74	0.862	0.753333	0.0141219
Itpr1	0.628	0.936	0.992	0.852	0.261015
Selenow	0.625	0.725	0.696	0.682	0.000431379
Sympk	0.599	0.801	0.844	0.748	0.0289285
Czib	0.593	0.685	0.769	0.682333	0.00334078
Sephs1	0.628	0.792	0.918	0.779333	0.0582843
Pars2	0.628	0.856	0.873	0.785667	0.0533404
Fam24a	0.628	0.711	0.56	0.633	0.00109642
Cops8	0.593	0.839	0.814	0.748667	0.0324241
Ube4a	0.585	0.652	0.712	0.649667	0.000671222
Glyctk	0.629	0.751	0.846	0.742	0.014756
Tomm6	0.629	0.889	0.836	0.784667	0.0532808
Elob	0.585	0.736	0.701	0.674	0.00203086
Tmem251	0.629	1.078	0.94	0.882333	0.425597
Pi4k2b	0.629	0.71	1.003	0.780667	0.125705
Prpsap1	0.561	0.667	0.649	0.625667	0.000334215
Cylc1	0.561	0.635	0.711	0.635667	0.00109239
Prss40	0.543	0.773	0.627	0.647667	0.00632524
K230010J24Rik	0.542	0.638	0.649	0.609667	0.000327925
Nqo2	0.54	0.556	0.575	0.557	1.62578e-06
Ppp4c	0.521	0.696	0.61	0.609	0.00150129
Cd55b	0.519	0.667	0.471	0.552333	0.00161661
Slc38a2	0.631	0.803	0.799	0.744333	0.0107333
Lrch4	0.631	0.841	0.868	0.78	0.0425164
Ap1m1	0.498	0.643	0.637	0.592667	0.00100465
Msto1	0.421	0.481	0.611	0.504333	0.000904282
Lrrc8c	0.632	0.878	0.954	0.821333	0.139826
Isg15	1.651	2.55	2.021	2.074	0.014648
B4galt4	1.61	0.927	0.887	1.14133	0.579392
Ndufaf4	0.786	0.85	0.864	0.833333	0.00226181
Bpgm	0.633	0.807	1.465	0.968333	0.906565
Derl2	0.633	0.908	0.958	0.833	0.173701
Ly6c1	0.633	1.842	1.349	1.27467	0.477617
Rexo2	0.779	0.846	0.842	0.822333	0.00121162
Chmp5	0.634	0.817	0.782	0.744333	0.0103497
Cfd	0.634	0.943	0.929	0.835333	0.177504
Mtr	0.634	0.81	0.806	0.75	0.0125511
Wfdc8	0.634	0.941	0.794	0.789667	0.0766009
Scrn1	0.634	0.977	0.968	0.859667	0.281621
Slc30a3	0.634	0.712	0.743	0.696333	0.000724141
Nif3l1	0.731	0.637	0.701	0.689667	0.000362499
Cryl1	0.7	0.804	0.723	0.742333	0.00122233
Actl11	0.679	0.71	0.81	0.733	0.00250451
Sft2d1	0.635	0.725	1.047	0.802333	0.189134
Gm49368	0.658	0.825	1.173	0.885333	0.491788
Dtymk	0.653	0.854	0.742	0.749667	0.0125963
Snrpa	0.635	0.895	1.107	0.879	0.425423
Got1	0.652	0.698	0.805	0.718333	0.00341177
Lpp	0.646	0.74	0.659	0.681667	0.000413161
Ccdc6	0.645	0.822	0.858	0.775	0.0268263
Gdpd4	0.643	0.764	0.741	0.716	0.00156483
Sirt2	0.63	0.665	0.854	0.716333	0.015131
Epn1	0.636	0.948	1.009	0.864333	0.305367
Sephs2	0.624	0.706	0.702	0.677333	0.000268584
Atp8a2	0.619	0.716	0.659	0.664667	0.000284244
Hscb	0.637	0.771	0.858	0.755333	0.0189975
Dnah8	0.637	0.807	0.925	0.789667	0.0656163
Dync1li1	0.637	0.77	1.041	0.816	0.196562
Lypla1	0.618	0.794	0.722	0.711333	0.00483202
Szrd1	0.637	0.818	0.771	0.742	0.00891851
Ate1	0.637	0.809	0.793	0.746333	0.00985317
Prss44	0.614	0.7	0.758	0.690667	0.00178335
Ranbp3	0.612	0.684	0.601	0.632333	0.000145784
Ggct	0.602	0.618	0.576	0.598667	5.15629e-06
#VALUE!	0.596	0.744	0.631	0.657	0.00154532
Akr1e1	0.638	0.955	1.002	0.865	0.303021
Nedd8	0.638	0.829	0.889	0.785333	0.0470258
Nae1	0.589	0.653	0.604	0.615333	3.75831e-05
Ubl4a	0.562	0.616	0.697	0.625	0.000669058
Glipr1l2	0.556	0.649	0.661	0.622	0.000338666
Ubxn1	0.639	0.862	0.898	0.799667	0.0687128
Hspb9	0.552	0.686	0.593	0.610333	0.000600607
Fam78a	0.546	0.533	0.542	0.540333	2.93356e-08
Abhd17b	0.639	0.7	0.745	0.694667	0.000575097
Txndc17	0.544	0.836	0.759	0.713	0.0303662
Gm12117	0.64	0.855	0.777	0.757333	0.018121
Pde1c	0.54	0.638	0.695	0.624333	0.00115087
Efcab6	0.64	0.785	0.871	0.765333	0.0253189
Gspt2	0.64	0.972	0.922	0.844667	0.207255
Tollip	0.538	0.637	0.722	0.632333	0.00229443
Spaca7	0.536	0.598	0.554	0.562667	1.8641e-05
Cbwd1	0.64	0.748	0.892	0.76	0.0302729
Ubac1	0.534	0.717	0.813	0.688	0.0188989
Reep6	0.509	0.614	0.578	0.567	0.000148668
Capn11	0.496	0.602	0.66	0.586	0.000994591
Stx2	0.482	0.538	0.579	0.533	7.6928e-05
Ubl4b	0.455	0.458	0.52	0.477667	1.60574e-05
Gale	0.641	0.703	0.881	0.741667	0.022931
Rpl35a	1.442	1.812	1.838	1.69733	0.00549658
Lamtor4	0.641	0.69	1.213	0.848	0.453008
Nub1	0.641	0.92	0.84	0.800333	0.0737802
Notch2	0.641	0.846	0.877	0.788	0.045781
Fgfr1op2	0.641	0.906	1.061	0.869333	0.34665
Ubfd1	0.641	0.704	0.791	0.712	0.00269575
Cab39	0.867	0.86	0.698	0.808333	0.0255373
Otub2	0.846	1.465	1.317	1.20933	0.324777
Serpina3k	0.642	0.903	0.956	0.833667	0.161692
Gm20498	0.81	0.886	0.851	0.849	0.00234447
Pfdn5	0.642	0.864	0.797	0.767667	0.024144
Serpinh1	0.79	0.802	0.846	0.812667	0.000387511
Crk	0.642	0.903	1.054	0.866333	0.328942
Cyp2d22	0.642	0.693	1.029	0.788	0.155679
Slc6a16	0.642	0.693	0.668	0.667667	2.28152e-05
Ank3	0.642	0.878	0.934	0.818	0.111685
Gorasp1	0.643	0.815	0.771	0.743	0.00758781
Mtap	0.643	0.854	0.939	0.812	0.0994678
Nudt9	0.783	0.835	0.727	0.781667	0.00219044
Rnaseh2a	0.782	0.562	0.803	0.715667	0.0210337
Samhd1	0.78	0.822	1.174	0.925333	0.582232
Cacna2d1	0.762	0.861	0.786	0.803	0.00271967
Arpc1a	0.643	0.731	0.812	0.728667	0.00512299
Tars	0.755	0.832	0.86	0.815667	0.00420119
Lars2	0.728	0.829	0.752	0.769667	0.00164021
Lgmn	0.644	0.945	0.823	0.804	0.0883931
Edem3	0.644	0.919	1.057	0.873333	0.355641
Mrpl2	0.644	1.103	1.102	0.949667	0.758426
Xpo5	0.644	0.894	0.9	0.812667	0.0905241
Eipr1	0.644	0.684	0.756	0.694667	0.00073833
Ube2m	0.702	0.761	0.747	0.736667	0.000121486
Cylc2	0.669	0.717	0.568	0.651333	0.00136205
St6galnac2	0.657	0.76	0.733	0.716667	0.000779082
Ptpmt1	0.654	0.709	0.601	0.654667	0.000377911
Gnpnat1	0.645	0.84	0.819	0.768	0.0198752
Abcc12	0.642	0.65	0.675	0.655667	4.14138e-06
Ccdc43	0.645	0.818	0.982	0.815	0.130024
Lsp1	0.635	0.7	1.589	0.974667	0.938346
Mlycd	0.63	0.818	0.853	0.767	0.0281726
Pfn3	0.646	0.785	0.928	0.786333	0.0585162
Abca17	0.616	0.646	0.728	0.663333	0.00054959
Prss42	0.583	0.783	0.51	0.625333	0.0100959
Reps1	0.647	0.903	0.893	0.814333	0.0908338
Pla2g4a	0.647	0.776	0.866	0.763	0.0203117
Fsip2	0.647	0.994	0.894	0.845	0.207249
Fam129a	0.648	0.81	1.07	0.842667	0.269719
Mroh4	0.648	0.636	0.834	0.706	0.0101295
Rgn	0.648	0.895	0.894	0.812333	0.084417
Pla2g10	0.577	0.655	0.654	0.628667	0.000136157
Galnt16	0.648	0.84	0.908	0.798667	0.060927
Spata33	0.574	0.648	0.459	0.560333	0.00132642
Tubb6	0.649	0.995	1.122	0.922	0.610419
Tbcd	0.568	0.758	0.719	0.681667	0.00534773
Tmem190	0.649	0.989	0.929	0.855667	0.240394
Defb23	0.649	1.045	1.116	0.936667	0.685388
Pacsin1	0.649	1.121	0.884	0.884667	0.444969
Htatip2	0.552	0.796	0.698	0.682	0.0109406
Prss45	0.55	0.682	0.649	0.627	0.000712407
Nme8	0.541	0.69	0.567	0.599333	0.000952851
Fam221b	0.528	0.639	0.633	0.6	0.000374957
BB014433	0.52	0.704	0.606	0.61	0.00183686
Plcz1	0.503	0.708	0.754	0.655	0.01106
Nt5c1b	0.502	0.591	0.561	0.551333	6.76232e-05
Fn1	0.65	0.747	1.318	0.905	0.672131
Stam2	0.651	1.013	0.947	0.870333	0.308786
Ecm1	0.651	0.943	0.97	0.854667	0.227819
Ptpn23	0.651	0.851	1.127	0.876333	0.420812
BC049730	0.391	0.427	0.478	0.432	2.30856e-05
Gm4763	0.305	0.456	0.373	0.378	0.000141011
Aimp2	0.652	0.902	0.924	0.826	0.116823
Gnmt	0.652	0.655	0.641	0.649333	1.30028e-07
Wdr11	0.652	0.809	0.921	0.794	0.0575491
Hcls1	0.652	0.639	0.936	0.742333	0.0564531
Maoa	0.729	0.72	0.585	0.678	0.00229606
Acy1	0.719	0.811	0.816	0.782	0.00229676
Gart	0.699	0.804	0.905	0.802667	0.0294292
Coasy	0.698	0.719	0.652	0.689667	9.6494e-05
Hebp1	0.653	1.5	0.827	0.993333	0.980643
Fam170b	0.653	0.788	0.719	0.72	0.00198848
Efl1	0.653	0.903	0.705	0.753667	0.0318427
Dsg2	0.653	0.845	1.03	0.842667	0.221816
Svs2	0.653	5.275	0.376	2.10133	0.52635
Ctps2	0.676	0.844	0.784	0.768	0.00917177
Nudt18	0.653	0.723	0.896	0.757333	0.0282997
Mea1	0.653	1.124	1.166	0.981	0.913586
Ubqln2	0.654	0.992	0.965	0.870333	0.297862
Bag3	0.676	0.745	0.768	0.729667	0.00061261
Rpp14	0.654	0.802	0.644	0.7	0.00419877
Efhd2	0.654	0.973	1.038	0.888333	0.399953
Stat3	0.654	0.94	1.083	0.892333	0.441369
Aarsd1	0.654	0.96	0.758	0.790667	0.0802277
Cog6	0.654	0.826	1.052	0.844	0.247285
Gzmn	0.672	0.667	0.494	0.611	0.0026587
Vamp2	0.655	0.718	0.839	0.737333	0.00824813
Tmc5	0.669	0.849	0.804	0.774	0.0139325
Plcd1	0.655	0.855	0.888	0.799333	0.0510228
Agpat2	0.661	0.693	0.711	0.688333	2.86398e-05
Rmdn2	0.655	0.67	0.908	0.744333	0.035531
C2cd6	0.655	0.79	0.777	0.740667	0.003809
Ada	0.655	0.899	0.881	0.811667	0.0744384
Catsperz	0.641	0.834	0.746	0.740333	0.00962782
Bola3	0.64	0.605	0.759	0.668	0.00205324
Rps12-ps3	0.656	0.902	0.989	0.849	0.20451
Arl8b	0.656	0.612	1.117	0.795	0.273145
Ptpn6	0.656	0.86	1.048	0.854667	0.268484
Psen1	0.656	0.841	0.752	0.749667	0.00940327
Armc8	0.656	0.889	0.896	0.813667	0.077421
Lrp1	0.656	0.835	1.052	0.847667	0.254128
Slc22a14	0.656	0.701	0.686	0.681	1.75429e-05
Pla2g7	0.656	0.794	0.766	0.738667	0.00343147
Cd59b	0.639	0.7	0.532	0.623667	0.00155751
Gmpr2	0.629	0.699	0.756	0.694667	0.00114332
Dnah11	0.656	0.5	0.376	0.510667	0.00378725
Cpvl	0.617	0.716	0.65	0.661	0.00031051
Cops7b	0.592	0.763	0.849	0.734667	0.0246061
1700080O16Rik	0.588	0.751	0.848	0.729	0.0233236
Ly6f	0.657	1.198	1.023	0.959333	0.811191
Dcaf7	0.582	0.679	0.736	0.665667	0.00174526
Pdpk1	0.581	0.539	0.592	0.570667	1.18968e-05
Abca14	0.56	0.769	0.669	0.666	0.00521012
Ufd1	0.657	0.763	0.761	0.727	0.0014583
Rnf126	0.657	0.656	0.734	0.682333	0.000251295
Csde1	0.657	1.042	0.922	0.873667	0.328943
Cct8l1	0.657	0.817	0.885	0.786333	0.0341294
Pdcl2	0.555	0.618	0.72	0.631	0.00154895
Ppp6r1	0.554	0.691	0.686	0.643667	0.00135984
Pbp2	0.55	0.727	0.536	0.604333	0.00299607
Htt	0.658	0.677	0.817	0.717333	0.0048707
Rmdn2	0.658	0.645	0.579	0.627333	0.00010816
Pkib	0.524	0.687	0.696	0.635667	0.00285998
Chit1	0.523	0.689	0.56	0.590667	0.00124181
#VALUE!	0.508	0.589	0.446	0.514333	0.000302081
Lgals3	0.658	1.086	1.2	0.981333	0.915368
Nudt5	0.658	0.859	0.834	0.783667	0.0267683
Grb2	0.658	0.937	1.058	0.884333	0.384053
Izumo2	0.501	0.698	0.558	0.585667	0.00210143
Lypd8	1.197	0.695	0.484	0.792	0.380988
Adh1	0.659	0.927	0.92	0.835333	0.135271
Pcna	0.659	0.846	0.93	0.811667	0.0783908
Kpna4	0.659	0.824	0.95	0.811	0.0883105
Adam25	0.659	0.736	0.782	0.725667	0.00157224
Fam241a	0.659	0.986	1.024	0.889667	0.394849
Nudt13	0.745	0.701	0.711	0.719	2.98148e-05
Trnt1	0.699	0.735	0.816	0.75	0.00194566
Cul5	0.69	0.823	0.924	0.812333	0.0503531
Isyna1	0.66	0.941	0.956	0.852333	0.199819
Fbxo36	0.66	0.773	0.619	0.684	0.00236104
C8a	0.66	0.747	0.837	0.748	0.00786325
Fth1	0.66	0.762	0.803	0.741667	0.00370636
As3mt	0.677	0.767	0.61	0.684667	0.00227269
Ppp2r5a	0.676	0.783	0.783	0.747333	0.0020961
Rnf123	0.672	0.645	0.761	0.692667	0.000932073
Pnmt	0.662	0.821	0.817	0.766667	0.0111817
Scrn2	0.636	0.704	0.717	0.685667	0.000234467
Slc26a2	0.661	0.976	1.088	0.908333	0.512937
Adssl1	0.661	0.871	0.991	0.841	0.174543
Wbp2nl	0.622	0.695	0.675	0.664	0.000103013
Hars2	0.662	0.911	0.889	0.820667	0.0873259
Iars	0.662	0.878	0.894	0.811333	0.0652201
Pde10a	0.614	0.63	0.635	0.626333	4.9421e-07
Gatc	0.662	1.074	0.993	0.909667	0.513119
Pdp1	0.595	0.755	0.778	0.709333	0.00722805
Mipep	0.582	0.885	0.744	0.737	0.0397695
Txndc8	0.556	0.593	0.591	0.58	3.99505e-06
G6pc3	0.555	0.867	0.784	0.735333	0.0470172
Lrrc57	0.549	0.563	0.629	0.580333	6.99904e-05
Ly6k	0.486	0.588	0.466	0.513333	0.00020936
Odf4	0.662	0.764	0.68	0.702	0.000690646
Lipf	0.482	0.501	0.589	0.524	0.000133627
Cstb	0.663	1.015	0.91	0.862667	0.258435
Gatb	0.663	0.996	0.911	0.856667	0.224649
Ppm1g	0.663	1.043	1.04	0.915333	0.538945
Slc25a46	0.663	0.726	0.974	0.787667	0.0889321
Frzb	0.322	0.545	0.306	0.391	0.00139214
Anp32e	0.663	0.961	0.762	0.795333	0.0797514
Prom1	0.664	1.01	1.017	0.897	0.426636
Dnah6	0.664	0.899	0.977	0.846667	0.178429
Lamtor2	0.664	0.925	0.794	0.794333	0.0524599
Dnai1	0.664	0.778	0.916	0.786	0.0425033
Selenoi	0.831	0.86	0.817	0.836	0.000205002
Cav1	0.803	0.711	1.328	0.947333	0.797615
Slc25a19	0.665	0.68	0.807	0.717333	0.00329127
Cybb	0.665	0.883	1.369	0.972333	0.900643
Ppp2r5c	0.665	0.774	0.795	0.744667	0.00317491
Lipt2	0.665	0.828	0.798	0.763667	0.0091825
Ap1s2	0.802	0.744	0.743	0.763	0.000263107
Tmem65	0.724	0.845	0.819	0.796	0.00516558
2210016F16Rik	0.675	0.713	0.798	0.728667	0.00172342
Prune1	0.636	0.78	0.669	0.695	0.00218895
Amz2	0.635	0.669	0.719	0.674333	0.000182046
Clic3	0.666	0.968	0.944	0.859333	0.220285
Retreg3	0.667	0.899	1.156	0.907333	0.547543
Atg7	0.667	0.994	1.011	0.890667	0.384019
Mroh8	0.623	0.607	0.661	0.630333	2.08681e-05
Nqo1	0.667	1.136	1.077	0.96	0.79965
Insl6	0.598	0.615	0.536	0.583	6.44791e-05
Tbc1d22a	0.667	0.856	1.005	0.842667	0.182958
Btf3l4	0.668	0.9	0.83	0.799333	0.0432141
Cfap45	0.668	0.943	1.129	0.913333	0.552751
Sirt5	0.668	0.806	0.708	0.727333	0.00265282
Abhd11	0.668	0.755	0.759	0.727333	0.000780627
Rpe	0.597	0.682	0.623	0.634	0.000129591
Tmsb15l	0.579	0.56	0.664	0.601	0.00023718
Spint4	0.669	1.108	0.93	0.902333	0.486313
Hist1h2ba	0.669	0.864	1.044	0.859	0.262783
Kdelr1	0.669	1.174	1.505	1.116	0.658102
Stard6	0.556	0.628	0.626	0.603333	7.43482e-05
Spint5	0.669	0.922	0.765	0.785333	0.0436271
Sh3d21	0.55	0.603	0.672	0.608333	0.000376134
Galk1	0.669	1.061	1.004	0.911333	0.508527
Stxbp1	0.669	0.894	0.88	0.814333	0.0632314
Cst13	0.548	0.696	0.611	0.618333	0.000880606
Lpcat2b	0.523	0.6	0.609	0.577333	0.000101447
Rabggtb	0.522	0.674	0.736	0.644	0.00499216
Ccdc62	0.499	0.565	0.658	0.574	0.000763577
Chkb	0.493	0.665	0.7	0.619333	0.00400155
Cyb5r2	0.671	0.742	0.604	0.672333	0.00119173
Celf1	0.671	0.787	0.749	0.735667	0.00149951
Mrps17	0.671	0.995	0.911	0.859	0.220024
Ip6k1	0.463	0.542	0.49	0.498333	2.69774e-05
Dkkl1	0.45	0.69	0.556	0.565333	0.00332231
BC048507	0.672	0.745	0.869	0.762	0.0143873
Ppp6r3	0.672	0.825	0.918	0.805	0.0530357
Tmem38b	0.672	0.68	0.739	0.697	0.000137326
Cdc34	0.448	0.583	0.508	0.513	0.000237785
Mindy3	0.412	0.376	0.416	0.401333	1.21883e-06
Arpc3	1.343	2.027	2.457	1.94233	0.0438877
Cog4	0.673	0.949	1.048	0.89	0.382405
Cryzl2	0.673	0.971	0.768	0.804	0.0896003
C4b	0.673	0.868	1.095	0.878667	0.376034
Tex48	0.673	0.646	0.565	0.628	0.000330461
Ndrg3	0.898	0.839	1.154	0.963667	0.726136
Slc2a5	0.674	0.715	0.801	0.73	0.00195656
Dnah12	0.674	0.824	0.891	0.796333	0.0337036
Eif5b	0.674	0.854	0.912	0.813333	0.0597178
Tmem53	0.674	0.9	0.749	0.774333	0.0273885
Rps15	0.675	0.967	1.276	0.972667	0.882463
Tbcc	0.675	0.885	0.805	0.788333	0.0258398
Rabgef1	0.641	0.83	0.76	0.743667	0.00968705
Gmfb	0.676	0.92	0.869	0.821667	0.0743586
Abraxas2	0.603	0.659	0.648	0.636667	2.92128e-05
Gapdhs	0.563	0.725	0.485	0.591	0.00443227
Ubtd2	0.676	0.625	0.749	0.683333	0.000919694
#VALUE!	0.676	0.915	0.898	0.829667	0.0913805
Plpp1	0.676	0.77	1.038	0.828	0.187926
Arhgap17	0.676	0.879	0.881	0.812	0.05061
Cyp2j6	0.676	0.991	1.176	0.947667	0.738049
Epb41l5	0.676	0.817	0.852	0.781667	0.0153621
Gstp1	0.677	1.093	1.038	0.936	0.649447
Selenov	0.486	0.701	0.696	0.627667	0.00627418
Mllt11	0.278	0.269	0.272	0.273	1.05238e-09
Mif	0.677	0.919	0.718	0.771333	0.0377312
Mff	0.677	0.905	0.949	0.843667	0.137259
H2-Ke6	0.678	0.786	0.813	0.759	0.00427683
Ndufab1	0.678	1.023	0.678	0.793	0.146238
Ddx39b	0.678	0.911	0.978	0.855667	0.187576
Ttc25	0.678	1.03	1.031	0.913	0.500149
Snrpe	0.678	0.85	1	0.842667	0.166042
Tbc1d9b	0.678	0.856	0.989	0.841	0.152345
Nup85	0.678	0.749	0.976	0.801	0.0911837
Spata20	0.679	0.956	0.932	0.855667	0.178653
Cst3	0.679	0.838	0.9	0.805667	0.0418536
Pex19	0.679	0.981	1.084	0.914667	0.521278
Rsph6a	0.679	0.938	0.999	0.872	0.26194
Tmod1	0.679	1.346	1.328	1.11767	0.620172
Urm1	0.679	0.942	0.918	0.846333	0.141164
Sbds	0.679	0.832	0.914	0.808333	0.0496505
Capn2	0.68	0.961	0.953	0.864667	0.216721
Arfgef2	0.68	0.808	0.798	0.762	0.00442087
Tmc4	0.68	0.964	0.934	0.859333	0.19343
Mrpl55	0.68	1.058	0.982	0.906667	0.464134
Kif2a	0.68	0.86	1.036	0.858667	0.241056
Catsperb	0.68	0.816	1.139	0.878333	0.421931
Cdh3	0.681	0.765	0.885	0.777	0.0196514
Dhfr	0.681	0.929	1.046	0.885333	0.346641
Nedd4	0.681	0.91	0.937	0.842667	0.124749
Nup133	0.682	0.967	1.016	0.888333	0.343948
Psmb8	0.682	0.813	0.998	0.831	0.139003
Ptgr1	0.682	1.043	1.021	0.915333	0.508789
St6galnac2	0.682	0.889	0.97	0.847	0.148942
Slc25a54	0.682	0.637	0.731	0.683333	0.000308628
Des	0.683	0.851	0.795	0.776333	0.0105868
Cfap52	0.683	0.945	1.017	0.881667	0.308388
Acot1	0.683	0.813	0.94	0.812	0.0643906
Nup188	0.683	0.878	0.832	0.797667	0.0263405
Eif3h	0.683	0.939	1.023	0.881667	0.311555
Cfh	0.683	0.804	0.656	0.714333	0.00328748
Trp53i11	0.683	0.944	1.375	1.00067	0.997522
Hat1	0.683	0.526	0.351	0.52	0.00745931
Fga	0.684	0.983	0.823	0.83	0.120454
Ogfr	0.684	0.901	0.922	0.835667	0.0968737
Ipo7	0.684	0.954	0.938	0.858667	0.181386
Defb11	0.684	1.167	0.878	0.909667	0.554797
Ppp2cb	0.685	1.187	0.995	0.955667	0.77689
Clip1	0.685	0.944	0.94	0.856333	0.16887
Sept11	0.685	0.857	0.816	0.786	0.0145433
Gm20441	0.686	1.02	0.889	0.865	0.237041
Pitpnb	0.686	0.737	0.795	0.739333	0.00116208
Thnsl2	0.686	0.682	0.853	0.740333	0.0099669
Aqp9	0.687	1.032	1.084	0.934333	0.625986
Coq4	0.687	1.049	0.886	0.874	0.295049
Ppme1	0.688	0.799	0.596	0.694333	0.00647845
Elac2	0.688	0.841	0.796	0.775	0.00772732
Pacrg	0.689	0.971	0.94	0.866667	0.209633
Dgka	0.689	0.773	0.718	0.726667	0.000375218
Nckap1	0.689	0.905	0.837	0.810333	0.0409598
Acsf3	0.69	0.856	0.943	0.829667	0.0833763
Pagr1b	0.69	1.198	1.47	1.11933	0.629197
S100a16	0.69	0.836	0.912	0.812667	0.0451995
S100a6	0.691	0.748	1.688	1.04233	0.902129
Spag9	0.691	0.87	0.882	0.814333	0.0397037
Ppp2r5d	0.691	0.99	1.029	0.903333	0.416438
Memo1	0.691	0.963	0.86	0.838	0.110538
Ndufaf5	0.691	0.928	0.84	0.819667	0.0595947
Cib1	0.692	0.948	0.926	0.855333	0.152131
Thumpd1	0.692	0.856	1.002	0.85	0.169198
Rwdd1	0.692	1.064	0.96	0.905333	0.441081
Nck1	0.692	0.866	1.074	0.877333	0.32888
Mvp	0.693	0.947	0.971	0.870333	0.218596
Ppp2r2a	0.693	0.94	1.057	0.896667	0.39002
Odf1	0.693	0.867	0.925	0.828333	0.0694911
Mdp1	0.693	0.849	0.784	0.775333	0.00767349
Ahcyl1	0.694	0.882	0.856	0.810667	0.0323058
Gipc1	0.694	0.936	1.043	0.891	0.350567
Wfdc15b	0.694	1.009	0.999	0.900667	0.391011
Lims1	0.694	0.931	0.997	0.874	0.242652
Atp5o	0.695	0.733	0.799	0.742333	0.00105976
Cd34	0.695	0.651	1.044	0.796667	0.177263
Arl2	0.695	0.926	1.001	0.874	0.243023
Ccs	0.695	0.804	0.969	0.822667	0.0899573
Idua	0.695	0.975	0.943	0.871	0.218612
Mpc1	0.695	1.075	1.018	0.929333	0.582494
Nup214	0.696	1.054	0.951	0.900333	0.401958
Yif1b	0.696	0.822	1.027	0.848333	0.190957
Tyw1	0.696	0.859	1.004	0.853	0.173801
Tmem231	0.696	0.898	1.133	0.909	0.51098
Alg10b	0.696	0.832	0.886	0.804667	0.0259197
Stom	0.697	0.877	1.076	0.883333	0.346532
Pepd	0.697	0.952	1.059	0.902667	0.415938
Mtor	0.697	0.889	0.986	0.857333	0.168238
Adck1	0.697	1.092	1.041	0.943333	0.671502
Rprd1b	0.697	0.888	1.399	0.994667	0.980914
Cd68	0.697	1.002	1.234	0.977667	0.89274
Spns1	0.697	1.1	1.055	0.950667	0.718507
Gstt3	0.698	0.982	0.809	0.829667	0.108288
Eloc	0.698	0.7	0.675	0.691	2.7117e-06
Gmppb	0.698	0.9	0.994	0.864	0.194362
Rps20	0.698	0.819	0.943	0.82	0.0636428
Gstt1	0.698	1.148	1.275	1.04033	0.829076
Gps1	0.699	0.8	0.941	0.813333	0.0563933
Fdxr	0.699	0.906	0.808	0.804333	0.0307052
Tubg1	0.699	0.958	0.995	0.884	0.280832
Gba2	0.699	0.608	0.955	0.754	0.076972
Gbe1	0.699	0.75	1.323	0.924	0.723316
Lemd3	0.7	0.854	0.789	0.781	0.00800709
Galm	0.7	0.969	0.865	0.844667	0.118339
Pon2	0.7	0.872	0.923	0.831667	0.067101
Tbc1d23	0.7	1.048	0.938	0.895333	0.365754
Nup107	0.701	0.873	0.879	0.817667	0.0353781
Kctd12	0.701	0.907	1.024	0.877333	0.26369
1700021F05Rik	0.701	0.714	0.836	0.750333	0.00437662
Smarcb1	0.701	0.814	1.041	0.852	0.212869
Xrcc6	0.701	0.946	0.943	0.863333	0.16753
Ptgis	0.701	0.873	0.957	0.843667	0.106627
Anxa6	0.702	1.07	1.025	0.932333	0.590659
Rpsa	0.702	0.828	0.975	0.835	0.104638
Cth	0.702	1.046	0.946	0.898	0.374588
#VALUE!	0.702	0.93	0.901	0.844333	0.0955558
Vbp1	0.702	0.848	0.939	0.829667	0.0691231
Antxrl	0.702	0.858	0.793	0.784333	0.00885937
Mfn2	0.702	0.959	0.915	0.858667	0.149511
Slc44a2	0.703	0.875	0.877	0.818333	0.0345097
Slc41a1	0.703	0.956	1.213	0.957333	0.786368
Mprip	0.703	1.032	0.985	0.906667	0.415
Dpyd	0.703	0.741	0.962	0.802	0.0702896
Prps2	0.704	0.827	0.881	0.804	0.0200802
Lsm2	0.704	0.865	0.901	0.823333	0.0433742
Ddah1	0.704	0.967	0.872	0.847667	0.118641
Upf1	0.704	0.888	1.046	0.879333	0.289116
Cavin3	0.704	0.744	1.093	0.847	0.283261
Phgdh	0.705	0.991	0.847	0.847667	0.138778
Tsnax	0.705	0.926	0.993	0.874667	0.22317
Slc41a3	0.705	0.806	0.899	0.803333	0.0246558
Slc47a2	0.705	0.743	1.092	0.846667	0.281078
Smpdl3a	0.705	0.89	0.962	0.852333	0.12593
Lypla2	0.705	0.892	0.901	0.832667	0.0588462
Tuba3a	0.706	1.07	1.125	0.967	0.814164
Nrd1	0.706	0.996	0.983	0.895	0.32914
Arvcf	0.706	1.005	0.88	0.863667	0.190942
Wfdc15a	0.706	0.695	0.605	0.668667	0.000490567
Ddx19b	0.706	0.797	0.973	0.825333	0.0897285
Ankrd28	0.706	0.712	0.772	0.73	0.000213811
Unc45a	0.706	0.969	1.082	0.919	0.507373
Arl13b	0.706	0.77	0.885	0.787	0.0152552
Cops4	0.707	0.791	0.897	0.798333	0.0214171
Ints3	0.707	0.799	0.761	0.755667	0.000790563
Eif4a1	0.708	1.009	0.982	0.899667	0.355625
Abca3	0.708	0.918	0.872	0.832667	0.0584566
Twf1	0.708	1.024	0.933	0.888333	0.300195
Dnase1l2	0.708	0.88	0.863	0.817	0.0287215
Ppp1r21	0.708	1.18	0.773	0.887	0.48687
Psmd4	0.709	0.568	0.888	0.721667	0.0397068
Akr7a2	0.709	0.907	0.673	0.763	0.0311423
Ndufs6	0.709	0.891	0.957	0.852333	0.117277
Spg7	0.709	0.886	0.856	0.817	0.0286718
Tbc1d10a	0.709	0.93	0.905	0.848	0.095238
Lmbrd2	0.709	0.821	1.054	0.861333	0.244092
Retsat	0.709	0.914	0.778	0.800333	0.0295031
Adam1a	0.709	0.824	0.684	0.739	0.00375587
Apobec3	0.709	0.756	0.987	0.817333	0.100635
Dnm1l	0.71	1.011	0.969	0.896667	0.333891
Rabl6	0.71	0.943	0.994	0.882333	0.249508
Smim13	0.71	0.707	0.823	0.746667	0.0026762
Rnf213	0.71	1.104	1.102	0.972	0.841204
Prpf4	0.71	0.868	0.891	0.823	0.0358256
Mms19	0.71	0.821	0.711	0.747333	0.00236494
Cpne1	0.711	0.93	0.821	0.820667	0.0470269
Anxa11	0.711	1.019	1.242	0.990667	0.954562
Cdk5rap3	0.711	1.039	0.904	0.884667	0.292286
Rap1gds1	0.711	0.738	1.106	0.851667	0.309024
Slc30a7	0.711	1.002	0.93	0.881	0.245453
Gmds	0.711	0.833	0.779	0.774333	0.00307226
Trmt112	0.711	0.786	0.896	0.797667	0.0196679
Cbs	0.712	0.797	1.043	0.850667	0.20686
Ube2d3	0.712	0.74	0.849	0.767	0.00507164
Tpd52l2	0.712	1.04	0.9	0.884	0.289215
Cops6	0.712	0.8	0.897	0.803	0.0210677
Sh3glb1	0.712	0.789	0.862	0.787667	0.0080264
Lsm3	0.712	0.838	0.843	0.797667	0.00916443
Trap1	0.713	0.996	0.83	0.846333	0.134574
Anxa2	0.713	0.937	1.044	0.898	0.354632
Rps5	0.713	0.923	0.902	0.846	0.0823731
Lcn2	0.713	0.864	0.852	0.809667	0.0171339
Eif3k	0.713	0.922	1.085	0.906667	0.434893
Enah	0.713	0.8	0.65	0.721	0.00303293
Slc25a40	0.713	0.687	0.902	0.767333	0.0264343
Ccnk	0.713	1.13	0.957	0.933333	0.610864
Gnao1	0.714	0.82	0.829	0.787667	0.00453422
S100a1	0.714	1.009	1.179	0.967333	0.821783
Ddah2	0.714	1.081	1.039	0.944667	0.658162
Ddhd1	0.714	0.925	1.307	0.982	0.922382
Reps2	0.714	0.802	1.072	0.862667	0.271306
Mrps14	0.714	1.089	1.204	1.00233	0.988171
Sigmar1	0.714	0.703	0.644	0.687	0.000135095
Ms4a5	0.714	0.773	0.737	0.741333	0.000113117
G3bp2	0.714	0.923	0.746	0.794333	0.0340389
Igbp1	0.715	0.909	1.158	0.927333	0.601159
Dbnl	0.715	0.954	0.987	0.885333	0.251886
Nubpl	0.715	0.869	0.832	0.805333	0.013759
Arl3	0.715	1.044	0.937	0.898667	0.354656
Inpp5a	0.715	0.746	0.844	0.768333	0.00398149
Lamtor1	0.715	0.974	1.053	0.914	0.446948
Car12	0.715	0.811	0.766	0.764	0.00104569
Nars	0.716	0.984	0.875	0.858333	0.142775
Otub1	0.716	0.911	0.958	0.861667	0.13527
Apoc3	0.716	0.718	1.083	0.839	0.257411
Pip4k2c	0.716	0.918	1	0.878	0.221787
Yipf6	0.716	0.983	0.879	0.859333	0.144487
Abcb6	0.717	0.745	0.915	0.792333	0.0283878
Gfer	0.717	1.028	0.955	0.9	0.346887
Adi1	0.717	0.881	0.742	0.78	0.0125201
Gid8	0.717	0.796	0.931	0.814667	0.0412914
Anxa5	0.718	0.982	0.939	0.879667	0.215148
Fam49b	0.719	0.923	0.939	0.860333	0.119866
Mrpl44	0.719	0.876	1.001	0.865333	0.174142
Qrsl1	0.72	0.973	0.924	0.872333	0.174704
Aco1	0.721	0.939	0.944	0.868	0.146994
Usp30	0.721	0.899	0.869	0.829667	0.0363658
Atg5	0.721	1.146	1.008	0.958333	0.75595
Cbx1	0.721	0.796	1.243	0.92	0.649169
Pygb	0.722	0.927	0.935	0.861333	0.11754
Grhpr	0.722	0.908	0.856	0.828667	0.036491
Dusp3	0.722	0.704	0.91	0.778667	0.0283034
Usp47	0.722	0.894	0.863	0.826333	0.0304679
Ppa2	0.723	1.332	1.393	1.14933	0.523529
Gm11634	0.723	0.935	0.968	0.875333	0.179676
Pex2	0.723	0.872	0.928	0.841	0.0601039
Fut11	0.723	1.01	1	0.911	0.397551
Kiaa0100	0.723	0.91	0.985	0.872667	0.177488
Pcsk5	0.723	0.922	1.012	0.885667	0.251576
Pgp	0.724	0.967	0.983	0.891333	0.264438
Iqgap1	0.724	0.887	1.034	0.881667	0.256782
Ahsg	0.724	1.048	0.732	0.834667	0.196158
Dazap1	0.724	0.849	0.918	0.830333	0.0404026
#VALUE!	0.724	0.937	0.922	0.861	0.112833
Mtpn	0.724	0.976	0.969	0.889667	0.253808
Palm	0.724	0.845	1.033	0.867333	0.214043
Ccdc51	0.724	1.548	1.731	1.33433	0.341103
Vps28	0.724	0.902	0.844	0.823333	0.0280263
Mrpl22	0.724	1.048	0.833	0.868333	0.238775
Uqcrh	0.725	0.801	0.956	0.827333	0.0639616
Babam1	0.725	0.692	0.718	0.711667	8.74581e-06
Fgb	0.725	0.981	0.9	0.868667	0.15711
Lamc1	0.725	0.782	0.897	0.801333	0.01714
Tex54	0.725	0.684	0.572	0.660333	0.00175318
Cfl2	0.726	0.885	0.773	0.794667	0.0121197
Mrrf	0.726	1.062	0.908	0.898667	0.35562
Dnajb4	0.726	0.916	0.88	0.840667	0.0521997
Fntb	0.726	0.703	0.65	0.693	0.000167138
Eef1e1	0.726	0.874	0.998	0.866	0.163516
Plcg2	0.726	0.854	0.96	0.846667	0.0860515
Scin	0.726	0.819	0.972	0.839	0.0881314
Fam98a	0.726	0.836	0.808	0.79	0.00312795
Mfsd5	0.726	0.774	0.833	0.777667	0.0019873
Qars	0.727	0.84	0.912	0.826333	0.0321096
Csnk2a1	0.727	0.971	0.885	0.861	0.123612
Clpb	0.727	0.925	0.891	0.847667	0.0673329
Eif3m	0.727	0.923	1.037	0.895667	0.3133
Vwa5a	0.727	0.977	1.114	0.939333	0.620703
Tmem9	0.727	0.907	0.847	0.827	0.0308068
Klrb1c	0.727	0.978	1.085	0.93	0.545449
Polr2b	0.727	0.833	0.983	0.847667	0.109535
Git1	0.728	0.958	1.002	0.896	0.288056
Cog1	0.728	0.894	1.015	0.879	0.219485
Cpne5	0.728	1.016	0.888	0.877333	0.21489
Cct6b	0.729	0.903	0.953	0.861667	0.111229
Dars	0.729	0.842	0.865	0.812	0.0110472
Myl9	0.729	0.824	0.81	0.787667	0.0020024
Gfpt1	0.729	0.949	0.849	0.842333	0.0682701
Agk	0.729	1.015	0.896	0.88	0.221527
Psme3	0.729	1.021	1.141	0.963667	0.781261
Rab24	0.729	0.881	0.773	0.794333	0.0103818
Xdh	0.729	0.896	1.025	0.883333	0.244965
Wdr37	0.729	1.043	0.998	0.923333	0.477881
Eny2	0.729	0.837	1.01	0.858667	0.159242
Eif4g3	0.73	1.017	0.85	0.865667	0.181782
Exoc4	0.73	0.889	0.908	0.842333	0.0491195
Glrx5	0.73	0.7	0.841	0.757	0.004783
Surf1	0.73	1.021	0.953	0.901333	0.324413
Wars2	0.73	0.897	0.946	0.857667	0.0950674
Fnbp1	0.73	0.833	0.816	0.793	0.00290141
Acyp1	0.731	1.081	1.007	0.939667	0.601314
Nudt8	0.731	1.222	1.229	1.06067	0.731505
Yars2	0.731	0.976	1.007	0.904667	0.336155
Fads3	0.731	0.835	0.89	0.818667	0.0176968
Sppl2c	0.731	1.112	1.229	1.024	0.880905
Tap1	0.731	0.821	1.062	0.871333	0.262781
Dnajb1	0.732	1.226	1.035	0.997667	0.987833
Aaas	0.732	0.744	0.921	0.799	0.0302217
Sdr42e1	0.732	0.855	0.802	0.796333	0.00462906
Tax1bp3	0.732	0.816	0.967	0.838333	0.0783901
Eif3b	0.733	0.978	0.981	0.897333	0.279629
Kng1	0.733	0.969	0.818	0.84	0.0812689
Cab39l	0.733	0.666	0.76	0.719667	0.000554978
Slco6c1	0.733	0.882	0.637	0.750667	0.0249369
#VALUE!	0.733	1.084	0.989	0.935333	0.570657
Uros	0.733	0.792	0.946	0.823667	0.0499624
Ldha	0.734	0.968	1.07	0.924	0.487373
Sfxn1	0.734	0.972	0.926	0.877333	0.167667
Pex6	0.734	0.824	0.928	0.828667	0.0377797
Lcn6	0.734	0.924	0.829	0.829	0.035606
Gla	0.734	0.916	0.721	0.790333	0.0290803
Cap2	0.735	0.824	0.934	0.831	0.0425402
Fam183b	0.735	0.955	0.987	0.892333	0.245636
Plek	0.735	0.833	0.999	0.855667	0.13432
Psat1	0.736	0.945	1.019	0.9	0.303338
Fxr1	0.736	1.147	1.029	0.970667	0.822065
Cyb5r1	0.736	0.91	0.765	0.803667	0.0218129
Hdhd3	0.736	0.834	0.88	0.816667	0.0124722
Ago2	0.736	0.883	0.908	0.842333	0.0424496
Sec24d	0.736	0.905	0.84	0.827	0.02456
Elp1	0.736	0.909	0.883	0.842667	0.043191
Egfr	0.736	1.007	0.788	0.843667	0.132859
Gcn1	0.737	1.072	0.997	0.935333	0.558702
Ufm1	0.737	0.733	0.694	0.721333	3.46465e-05
Pafah1b2	0.737	0.916	1.042	0.898333	0.314614
S100a14	0.738	0.924	1.032	0.898	0.30056
Mrpl48	0.738	0.966	0.976	0.893333	0.241852
Pctp	0.738	0.915	0.695	0.782667	0.0320267
Rp2	0.738	0.748	1.052	0.846	0.209342
Eif3g	0.739	1.006	1.063	0.936	0.556483
Cars2	0.739	0.85	0.863	0.817333	0.00971531
Man2a1	0.739	0.946	1.215	0.966667	0.820752
Cul4b	0.739	0.968	0.988	0.898333	0.272033
B3gat3	0.739	1	0.885	0.874667	0.172337
Nisch	0.739	0.88	0.739	0.786	0.0103924
Eml4	0.74	0.915	0.924	0.859667	0.0791014
Sh3gl2	0.74	0.967	0.997	0.901333	0.290785
Api5	0.74	0.964	1.213	0.972333	0.849388
Tmem259	0.74	0.831	0.919	0.83	0.0302219
Nup58	0.74	0.765	0.772	0.759	1.56576e-05
Trappc4	0.74	0.752	0.82	0.770667	0.000773182
Spg21	0.74	0.825	1.034	0.866333	0.200703
Rida	0.741	0.954	0.898	0.864333	0.100423
Copg1	0.741	0.974	0.902	0.872333	0.137426
Aamdc	0.741	0.916	0.962	0.873	0.132293
Wdr41	0.741	0.861	0.865	0.822333	0.0119953
Atp11a	0.742	0.879	0.833	0.818	0.0106473
Add3	0.742	0.779	0.815	0.778667	0.00046467
Slc35f2	0.742	0.954	1.092	0.929333	0.525729
Sept9	0.742	0.947	0.877	0.855333	0.0739843
Abcb5	0.742	0.888	1.157	0.929	0.590469
Pygl	0.743	0.856	0.998	0.865667	0.142718
Gc	0.743	0.918	0.782	0.814333	0.0248877
Mri1	0.743	0.95	0.888	0.860333	0.0850608
Psph	0.743	0.989	0.849	0.860333	0.121483
Snrpa1	0.743	0.72	0.839	0.767333	0.00308881
Zdhhc20	0.743	0.951	0.873	0.855667	0.076062
Tuba1c	0.744	0.852	0.661	0.752333	0.0109977
Eef1b	0.744	0.995	0.896	0.878333	0.170881
Eif3d	0.744	0.964	0.939	0.882333	0.1659
Rnf149	0.744	0.946	0.824	0.838	0.0509364
Fxn	0.744	0.733	0.747	0.741333	4.3883e-07
Ankfy1	0.744	0.847	0.918	0.836333	0.031669
Cox7a1	0.744	1.032	0.829	0.868333	0.198128
Sfn	0.745	0.953	0.953	0.883667	0.168673
Cad	0.745	0.999	0.89	0.878	0.172593
Syne2	0.745	1.016	1.09	0.950333	0.660461
Naa15	0.745	0.906	0.998	0.883	0.188705
Vat1	0.746	0.911	0.947	0.868	0.0998481
Clic1	0.746	0.827	0.949	0.840667	0.0540578
Usp15	0.746	0.895	0.939	0.86	0.0745712
Ppox	0.746	0.964	0.945	0.885	0.174381
Ext2	0.746	0.81	0.894	0.816667	0.0128669
Atp11b	0.746	0.865	0.708	0.773	0.00864702
Cdc37l1	0.746	1.031	0.82	0.865667	0.190754
St3gal1	0.746	0.807	0.941	0.831333	0.0428705
Atp2b3	0.747	0.84	1.015	0.867333	0.166552
Anxa7	0.747	1.019	1.091	0.952333	0.672675
Pgm2	0.747	0.95	1.086	0.927667	0.503445
C7	0.747	0.968	0.905	0.873333	0.126251
Tjp1	0.747	0.918	0.953	0.872667	0.116007
Tbc1d15	0.747	0.919	0.888	0.851333	0.0483754
Nsun4	0.747	0.959	0.595	0.767	0.0918885
Ugt1a7c	0.748	0.869	1.234	0.950333	0.750949
Kras	0.748	0.915	0.981	0.881333	0.16216
Strip1	0.748	0.878	0.853	0.826333	0.0120561
Mrps18b	0.748	0.902	0.964	0.871333	0.115614
Pgm3	0.749	0.923	0.918	0.863333	0.0751752
Pdap1	0.749	1.074	0.625	0.816	0.241286
Pak2	0.749	0.852	0.922	0.841	0.0340323
Smim12	0.749	0.81	0.86	0.806333	0.00380267
Sec23a	0.75	0.886	0.946	0.860667	0.0741074
Cenpv	0.75	1.058	1.447	1.085	0.695052
Cops2	0.75	0.952	0.756	0.819333	0.0528399
Coro1b	0.75	0.956	0.832	0.846	0.0618537
Agpat1	0.75	0.85	0.903	0.834333	0.0209589
Strn	0.75	1.018	0.964	0.910667	0.336325
Ckb	0.751	1.05	0.822	0.874333	0.23596
S100a11	0.751	1.023	1.04	0.938	0.544054
Cfb	0.751	1.026	0.874	0.883667	0.217372
Decr1	0.752	1.007	0.63	0.796333	0.140613
Gsta3	0.752	0.871	0.797	0.806667	0.00508004
Pdk1	0.752	1.026	1.03	0.936	0.524978
Myadm	0.752	0.822	1.076	0.883333	0.301512
Rpl27a	0.752	0.831	1.118	0.900333	0.420755
Zc3hc1	0.753	0.901	0.973	0.875667	0.127282
Clic6	0.753	0.851	0.711	0.771667	0.00531105
Lingo1	0.753	0.766	1.015	0.844667	0.142528
Ehd3	0.754	0.909	0.83	0.831	0.0194904
Psme2	0.754	0.907	0.974	0.878333	0.135026
Ssb	0.754	0.988	1.067	0.936333	0.535263
Hoga1	0.754	1.079	1.135	0.989333	0.932757
Jpt2	0.754	0.793	0.703	0.75	0.000659649
Mbl2	0.755	1	1.003	0.919333	0.381834
Tomm7	0.755	0.965	0.735	0.818333	0.0689741
Fam185a	0.755	0.454	0.723	0.644	0.0203008
Rilpl1	0.755	0.7	1.093	0.849333	0.287341
Mrps7	0.755	0.934	1.116	0.935	0.566615
Prmt1	0.756	1.01	0.929	0.898333	0.24625
Renbp	0.756	1.001	1.073	0.943333	0.586533
Ccpg1	0.756	0.952	1.081	0.929667	0.497982
Tes	0.756	0.83	0.847	0.811	0.00248956
Glrx	0.756	0.935	1.011	0.900667	0.259089
Klc3	0.756	0.816	0.901	0.824333	0.0139622
Dnaja1	0.757	0.784	0.971	0.837333	0.0729577
Prpf31	0.757	0.946	1.002	0.901667	0.255275
Slc25a29	0.757	0.75	0.959	0.822	0.060212
Slc29a3	0.758	0.884	1.007	0.883	0.178925
Rps21	0.758	0.684	1.129	0.857	0.357591
Raver1	0.758	0.91	0.897	0.855	0.0407074
Cd97	0.759	0.982	1.112	0.951	0.659309
Tmem120a	0.759	0.923	1.039	0.907	0.316069
Tsg101	0.759	0.9	1.034	0.897667	0.266915
Fmc1	0.759	1.029	0.919	0.902333	0.28077
Oxsr1	0.759	1.126	0.978	0.954333	0.690433
Srsf7	0.759	0.837	1.174	0.923333	0.579594
F13a1	0.759	0.854	1.164	0.925667	0.576086
Sidt2	0.759	0.759	1.067	0.861667	0.249114
#VALUE!	0.759	0.884	0.871	0.838	0.0150628
Isg20	0.759	0.943	1.09	0.930667	0.509085
Pon3	0.76	0.92	0.754	0.811333	0.025569
Carmil1	0.76	0.882	0.9	0.847333	0.0255443
Pnpt1	0.76	0.919	0.841	0.84	0.0252215
Thoc2	0.76	0.743	0.896	0.799667	0.0144028
F2	0.76	0.774	0.857	0.797	0.00257328
Scrib	0.761	0.934	1.036	0.910333	0.326495
Eif3a	0.761	0.932	1.025	0.906	0.290882
Gspt1	0.761	0.935	0.907	0.867667	0.0702003
Sf3b3	0.761	0.887	1.086	0.911333	0.401702
Mob4	0.761	0.994	0.912	0.889	0.179134
#VALUE!	0.761	0.908	0.907	0.858667	0.0443777
Arpc4	0.761	0.933	0.907	0.867	0.0678726
Hgs	0.761	0.913	0.902	0.858667	0.0446481
March5	0.761	0.84	0.895	0.832	0.0124472
Macf1	0.761	0.984	1.111	0.952	0.663339
Myh10	0.762	0.881	0.952	0.865	0.0715499
Hist1h1a	0.762	0.913	1.277	0.984	0.921669
Rps3	0.762	1.002	0.962	0.908667	0.285992
Strap	0.762	0.892	0.877	0.843667	0.0189854
Arxes1	0.762	0.873	0.927	0.854	0.0397065
Tbcb	0.762	0.995	0.87	0.875667	0.13849
Ano1	0.762	1.115	0.939	0.938667	0.579704
Cox20	0.762	0.842	0.744	0.782667	0.00195575
Nars2	0.762	0.868	0.887	0.839	0.0143763
Myg1	0.762	0.836	0.853	0.817	0.00280727
Eprs	0.763	0.894	0.916	0.857667	0.0407254
Abcf1	0.763	0.954	0.881	0.866	0.0737035
Mrps26	0.763	0.988	0.89	0.880333	0.140035
Ptprc	0.763	0.725	1.081	0.856333	0.272012
Cacybp	0.763	1.162	0.882	0.935667	0.615361
Smarcc2	0.763	1.022	1.042	0.942333	0.555938
Sptbn1	0.764	0.828	0.914	0.835333	0.0192813
Akr1c13	0.764	1.028	0.875	0.889	0.220561
Cavin2	0.764	0.94	1.123	0.942333	0.607589
Hspb1	0.764	1	1.026	0.93	0.448211
Chmp2b	0.764	0.941	0.855	0.853333	0.0454658
Brox	0.764	0.821	0.787	0.790667	0.000225296
Tmem30a	0.765	1.067	1.12	0.984	0.891936
Ola1	0.765	1.031	1.165	0.987	0.917265
Adprh	0.765	1.007	1.001	0.924333	0.396103
Picalm	0.765	0.938	1.032	0.911667	0.321763
Casp3	0.765	1.535	1.354	1.218	0.401423
Gpat4	0.765	1.02	0.871	0.885333	0.195986
Lipi	0.765	0.882	0.863	0.836667	0.0107757
Txndc15	0.765	1.049	0.798	0.870667	0.222692
Trappc10	0.765	0.893	0.735	0.797667	0.013959
Serpina1b	0.766	0.892	0.961	0.873	0.0901452
Atl2	0.766	0.859	0.86	0.828333	0.005301
Prrc1	0.766	0.918	0.937	0.873667	0.0798433
Ptpn11	0.766	1.052	1.005	0.941	0.541668
Usp19	0.766	0.874	0.925	0.855	0.0364495
Stc1	0.766	1.397	1.199	1.12067	0.552513
Mblac2	0.766	0.869	0.88	0.838333	0.0112214
Txndc11	0.766	1.007	0.962	0.911667	0.298454
Mark2	0.766	0.983	0.904	0.884333	0.142195
Gpt2	0.767	0.994	0.884	0.881667	0.145302
Cars	0.767	0.899	0.924	0.863333	0.0485117
Hexa	0.767	0.938	0.96	0.888333	0.14112
Exog	0.767	1.023	1.035	0.941667	0.541039
Zpr1	0.767	0.976	0.845	0.862667	0.087428
Sphk2	0.767	1.005	0.999	0.923667	0.385108
Erlin1	0.768	0.9	0.928	0.865333	0.0524576
Eif3e	0.768	1.012	0.874	0.884667	0.177863
Rps2	0.768	0.933	0.952	0.884333	0.118835
Isoc1	0.768	0.878	0.821	0.822333	0.00501215
Cog3	0.768	0.926	1.185	0.959667	0.756677
Gfm2	0.768	0.936	1.034	0.912667	0.323741
Tbc1d17	0.768	0.883	1.165	0.938667	0.630479
Trappc9	0.768	0.835	0.757	0.786667	0.000939227
Eif3l	0.769	0.937	0.921	0.875667	0.0809095
Hnrnpul1	0.769	0.839	0.862	0.823333	0.0032121
Cadm1	0.769	0.747	0.828	0.781333	0.000828701
Spryd7	0.769	0.875	0.987	0.877	0.122356
Cox6c	0.769	0.598	0.762	0.709667	0.00653138
Ciapin1	0.769	1.089	0.987	0.948333	0.613184
Wars	0.77	1.057	0.825	0.884	0.257609
Gstm1	0.77	1.025	0.925	0.906667	0.276759
Ap2a1	0.77	0.899	0.982	0.883667	0.132337
Arfgap1	0.77	1.07	0.847	0.895667	0.310633
Fkbp3	0.77	0.923	0.935	0.876	0.0798452
Snrpb	0.77	0.823	0.829	0.807333	0.000505489
Trappc12	0.77	0.884	1.01	0.888	0.181419
Cyp4f13	0.77	0.957	0.882	0.869667	0.0744554
Eif4a2	0.771	0.966	0.939	0.892	0.151353
Lztfl1	0.771	0.919	0.94	0.876667	0.0812108
Snrpd3	0.771	0.965	0.979	0.905	0.229894
Smarca4	0.771	0.859	0.762	0.797333	0.00280933
Man1b1	0.771	0.931	0.882	0.861333	0.0428226
B3glct	0.771	1.029	0.819	0.873	0.184174
Capza2	0.772	0.911	0.908	0.863667	0.040981
Eif2s1	0.772	1.02	0.83	0.874	0.167793
Pigs	0.772	0.795	1.042	0.869667	0.206018
Eif3i	0.772	0.895	1.041	0.902667	0.278814
Mrps9	0.772	0.939	0.965	0.892	0.148628
Psmd10	0.772	0.921	1.146	0.946333	0.647404
Sept2	0.772	0.856	0.863	0.830333	0.00438575
Banf2	0.772	0.919	0.813	0.834667	0.019519
H2afx	0.773	1.039	1.38	1.064	0.734063
Mtnd3	0.773	0.909	1.056	0.912667	0.345391
Stx17	0.773	0.995	0.956	0.908	0.250002
Rtn4ip1	0.773	0.821	0.948	0.847333	0.0430571
Vps51	0.773	0.683	0.933	0.796333	0.049518
Gm20390	0.774	0.819	0.68	0.757667	0.00408313
Rack1	0.774	0.912	1.061	0.915667	0.366387
Snx6	0.774	0.886	0.905	0.855	0.0238444
Abcc1	0.774	0.939	0.804	0.839	0.0337684
Zadh2	0.774	0.971	0.878	0.874333	0.0917681
Srsf1	0.774	0.925	1.111	0.936667	0.551222
Pnpo	0.774	1.422	1.257	1.151	0.480733
Efemp1	0.774	1.004	1.222	1	1
Hspd1	0.775	0.582	0.468	0.608333	0.0119543
Psme1	0.775	0.917	0.984	0.892	0.154503
Adpgk	0.775	0.898	0.857	0.843333	0.0123229
Rbbp7	0.775	0.902	0.966	0.881	0.101324
Map1s	0.775	0.865	0.973	0.871	0.087276
Rab3ip	0.775	0.973	0.831	0.859667	0.0758687
Pex5	0.775	0.971	0.829	0.858333	0.0724718
Slc3a2	0.776	0.992	1.137	0.968333	0.777754
Galnt7	0.776	1.073	0.925	0.924667	0.4292
Mtnd5	0.776	0.827	0.884	0.829	0.00539148
Eml2	0.776	0.982	0.854	0.870667	0.0975618
Ptprf	0.776	0.865	0.904	0.848333	0.0160761
Cbr4	0.777	0.879	0.876	0.844	0.00962427
Nup210	0.777	0.932	1.026	0.911667	0.290568
Ddx6	0.777	1.017	1.012	0.935333	0.459944
Abca2	0.777	0.963	0.836	0.858667	0.0616213
Plec	0.778	1.029	0.982	0.929667	0.412906
Suclg2	0.778	1.048	1.114	0.98	0.855199
Lrba	0.778	0.887	0.955	0.873333	0.0699059
Sae1	0.778	0.94	0.993	0.903667	0.210564
Gapvd1	0.778	0.933	1.044	0.918333	0.349424
Coa3	0.778	1.132	1.103	1.00433	0.971368
Uba7	0.778	1.162	1.419	1.11967	0.555515
Akap2	0.778	0.764	1.152	0.898	0.467109
Ahctf1	0.778	0.88	1.254	0.970667	0.849243
Scd4	0.778	0.955	1.069	0.934	0.479174
H2-K1	0.779	0.947	0.866	0.864	0.048629
Mapre2	0.779	0.928	1.069	0.925333	0.422902
Gimap4	0.779	0.81	1.163	0.917333	0.53885
Ube2o	0.779	1.014	1.016	0.936333	0.463733
Chordc1	0.779	1.048	0.879	0.902	0.279967
Ogfod3	0.779	0.903	0.92	0.867333	0.0405218
Tubb2b	0.78	1.122	0.837	0.913	0.457045
Anxa1	0.78	0.907	1.008	0.898333	0.198092
Rab5a	0.78	1.024	0.847	0.883667	0.18521
Qdpr	0.78	0.821	0.88	0.827	0.00397691
Timm10	0.78	0.98	0.854	0.871333	0.0922529
Ahsa1	0.78	1.101	1.123	1.00133	0.990979
Twf2	0.78	0.901	1.077	0.919333	0.402477
Prpf3	0.78	0.944	1.051	0.925	0.395138
Hnrnpr	0.781	0.793	0.991	0.855	0.100254
Slmap	0.781	0.937	1.063	0.927	0.421353
Endod1	0.781	0.922	0.854	0.852333	0.0222163
Arfip1	0.781	0.841	0.97	0.864	0.071278
Cyfip1	0.781	0.92	0.977	0.892667	0.138956
Ghdc	0.781	0.95	1.057	0.929333	0.428758
Zfpl1	0.781	0.901	0.945	0.875667	0.0641849
Ndufa12	0.782	0.888	0.946	0.872	0.056045
Rnase12	0.782	0.96	0.761	0.834333	0.0585275
Yars	0.782	0.992	1.009	0.927667	0.377831
Mindy2	0.782	1.066	0.953	0.933667	0.466699
Ssr3	0.783	0.937	0.866	0.862	0.036184
#VALUE!	0.783	0.941	0.965	0.896333	0.143561
Sdf2	0.783	0.95	1.092	0.941667	0.549244
Prss50	0.783	0.684	0.708	0.725	0.00076795
1700029H14Rik	0.783	1.059	1.226	1.02267	0.869225
Ostf1	0.783	1.136	1.074	0.997667	0.983919
Fars2	0.783	0.829	0.843	0.818333	0.000556796
Capza1	0.784	0.92	1.011	0.905	0.2232
Tsta3	0.784	0.971	1.017	0.924	0.346215
Rsph1	0.784	0.909	1.184	0.959	0.746058
Mrpl9	0.784	1.093	0.952	0.943	0.558052
Sult1c2	0.784	0.945	1.215	0.981333	0.889166
Stard5	0.784	0.901	0.861	0.848667	0.0116208
Ppp2ca	0.785	1.283	1.383	1.15033	0.461886
Eif4b	0.785	0.963	1.103	0.950333	0.61801
Taldo1	0.785	0.961	0.989	0.911667	0.238707
Tagln	0.785	0.834	0.893	0.837333	0.0064712
Sec62	0.785	0.917	0.834	0.845333	0.015933
Mrps35	0.785	0.77	0.789	0.781333	2.92177e-06
Gnpda1	0.786	0.498	0.494	0.592667	0.0135481
Psmd5	0.786	0.885	0.881	0.850667	0.00991371
Mapk1	0.786	0.913	1.008	0.902333	0.203444
Seh1l	0.786	0.902	0.939	0.875667	0.0542215
Dsc2	0.786	0.922	0.882	0.863333	0.0276141
Serpina1d	0.787	0.821	1.065	0.891	0.281097
Polr2h	0.787	0.79	1.205	0.927333	0.628353
Paics	0.787	0.933	0.941	0.887	0.0869116
Sh3bgrl3	0.787	0.971	0.917	0.891667	0.11827
Ptk7	0.787	0.868	0.931	0.862	0.0296225
Cox15	0.787	0.913	1.001	0.900333	0.183779
Slc16a2	0.787	1.128	0.994	0.969667	0.774998
Dnajc7	0.787	0.9	0.819	0.835333	0.00806221
Nup62	0.788	0.929	0.962	0.893	0.11541
Syncrip	0.788	0.911	0.955	0.884667	0.0822266
Ttc38	0.788	0.779	0.846	0.804333	0.000737741
Trim14	0.788	0.872	0.921	0.860333	0.0228299
Pdcd6ip	0.789	0.944	1.006	0.913	0.248887
Tsfm	0.789	1.047	0.952	0.929333	0.401339
Anxa3	0.789	0.896	1.102	0.929	0.48266
Fmo1	0.789	0.767	1.101	0.885667	0.348877
Plg	0.79	0.915	0.973	0.892667	0.117741
Entpd2	0.79	0.892	0.835	0.839	0.00548732
Clcn7	0.79	0.94	0.824	0.851333	0.0306704
Ddi2	0.79	1.206	1.134	1.04333	0.752644
Stam	0.79	0.967	0.911	0.889333	0.101481
Pabpc1	0.791	0.942	1.042	0.925	0.362031
Eif3j1	0.791	1.05	1.05	0.963667	0.695493
Drg1	0.791	0.953	0.93	0.891333	0.0982693
Tsn	0.791	0.988	0.967	0.915333	0.246742
Nfu1	0.791	0.759	0.974	0.841333	0.0768965
Atxn10	0.791	0.962	0.998	0.917	0.263485
Tpk1	0.791	0.914	0.929	0.878	0.0492715
Dcxr	0.791	0.794	0.997	0.860667	0.11046
Abcb1b	0.791	1.079	1.291	1.05367	0.729871
Pfdn6	0.791	0.906	0.886	0.861	0.0172699
Rpl5	0.792	0.96	1.223	0.991667	0.950214
Mapk3	0.792	1.116	1.03	0.979333	0.841541
Rps10	0.792	1.096	0.824	0.904	0.375879
Spr	0.792	0.856	1.01	0.886	0.152835
Rint1	0.792	0.896	0.991	0.893	0.136089
Tmem126a	0.792	0.993	0.88	0.888333	0.127336
H2afz	0.792	1.178	0.951	0.973667	0.825668
Cyb5a	0.793	0.988	1.107	0.962667	0.704233
Gba	0.793	1.025	0.951	0.923	0.323377
Pptc7	0.793	1.002	0.976	0.923667	0.310303
Gsk3b	0.794	0.842	0.885	0.840333	0.00370959
Lmf2	0.794	0.956	1.142	0.964	0.738386
Dhx15	0.794	0.734	0.873	0.800333	0.00770288
Trappc3	0.794	0.876	0.839	0.836333	0.00230949
Uggt2	0.794	0.908	0.971	0.891	0.103147
Tor1a	0.794	0.92	1.074	0.929333	0.432025
Nup88	0.795	0.851	0.872	0.839333	0.00220227
Mfn1	0.795	1.033	0.927	0.918333	0.301149
Uba2	0.795	0.857	1.101	0.917667	0.427814
Cnp	0.795	0.844	0.941	0.86	0.0309792
Itm2c	0.795	0.83	0.805	0.81	5.2969e-05
Actr10	0.795	0.956	1.258	1.003	0.983422
Tspan6	0.795	0.71	0.712	0.739	0.000737851
Acat2	0.796	1.001	0.8	0.865667	0.118133
Usp14	0.796	0.943	0.998	0.912333	0.219629
Pcbp1	0.796	0.963	0.91	0.889667	0.0886807
Rps8	0.796	0.936	0.943	0.891667	0.0864134
Nap1l1	0.796	1.005	1.056	0.952333	0.581282
Snx2	0.796	0.97	0.943	0.903	0.147238
Srm	0.796	0.811	0.95	0.852333	0.0394698
Gramd1b	0.796	1.003	1.167	0.988667	0.920994
Lmf1	0.796	0.81	0.94	0.848667	0.0299063
Actl6a	0.796	0.867	0.946	0.869667	0.0396091
Ptgfrn	0.796	0.969	0.977	0.914	0.218971
Mtfr1l	0.796	1.197	0.888	0.960333	0.760012
Scamp4	0.796	0.661	0.662	0.706333	0.00280887
Nucb2	0.797	1.052	0.907	0.918667	0.332527
Gsn	0.797	1.004	1.056	0.952333	0.579281
[truncated: 1,888 more rows]
