# Supplementary material for: UBL7 is indispensable for spermiogenesis through protecting critical factors from excessive degradation by proteasomes
Source: Research Square preprint supplement (doi:10.21203/rs.3.rs-5024972/v1), 2024-09-11

**Uncropped images of Western blot.**

PVDF membranes were cut into several small pieces to incubate with different antibodies. Black (and red) boxes indicate images showed in relevant figures.


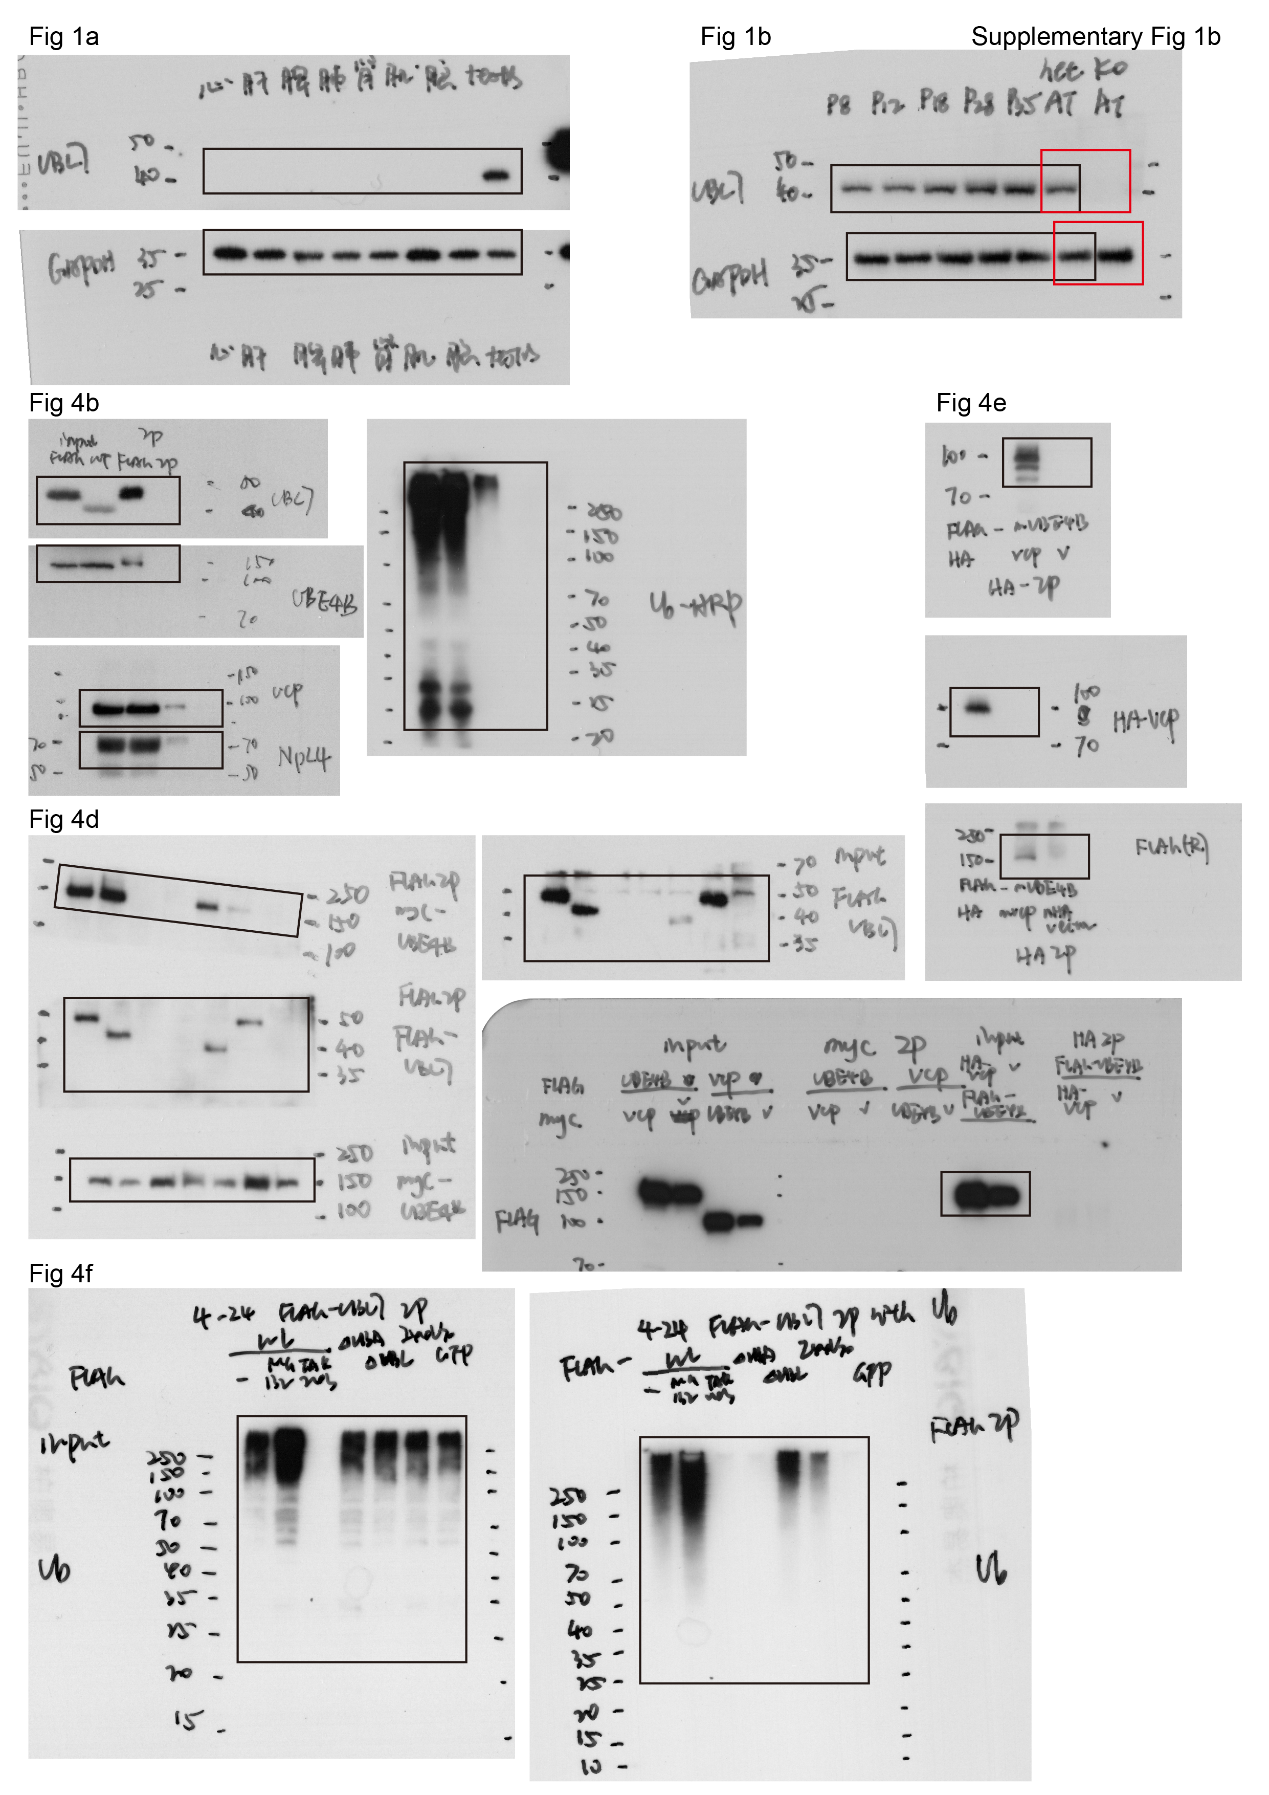

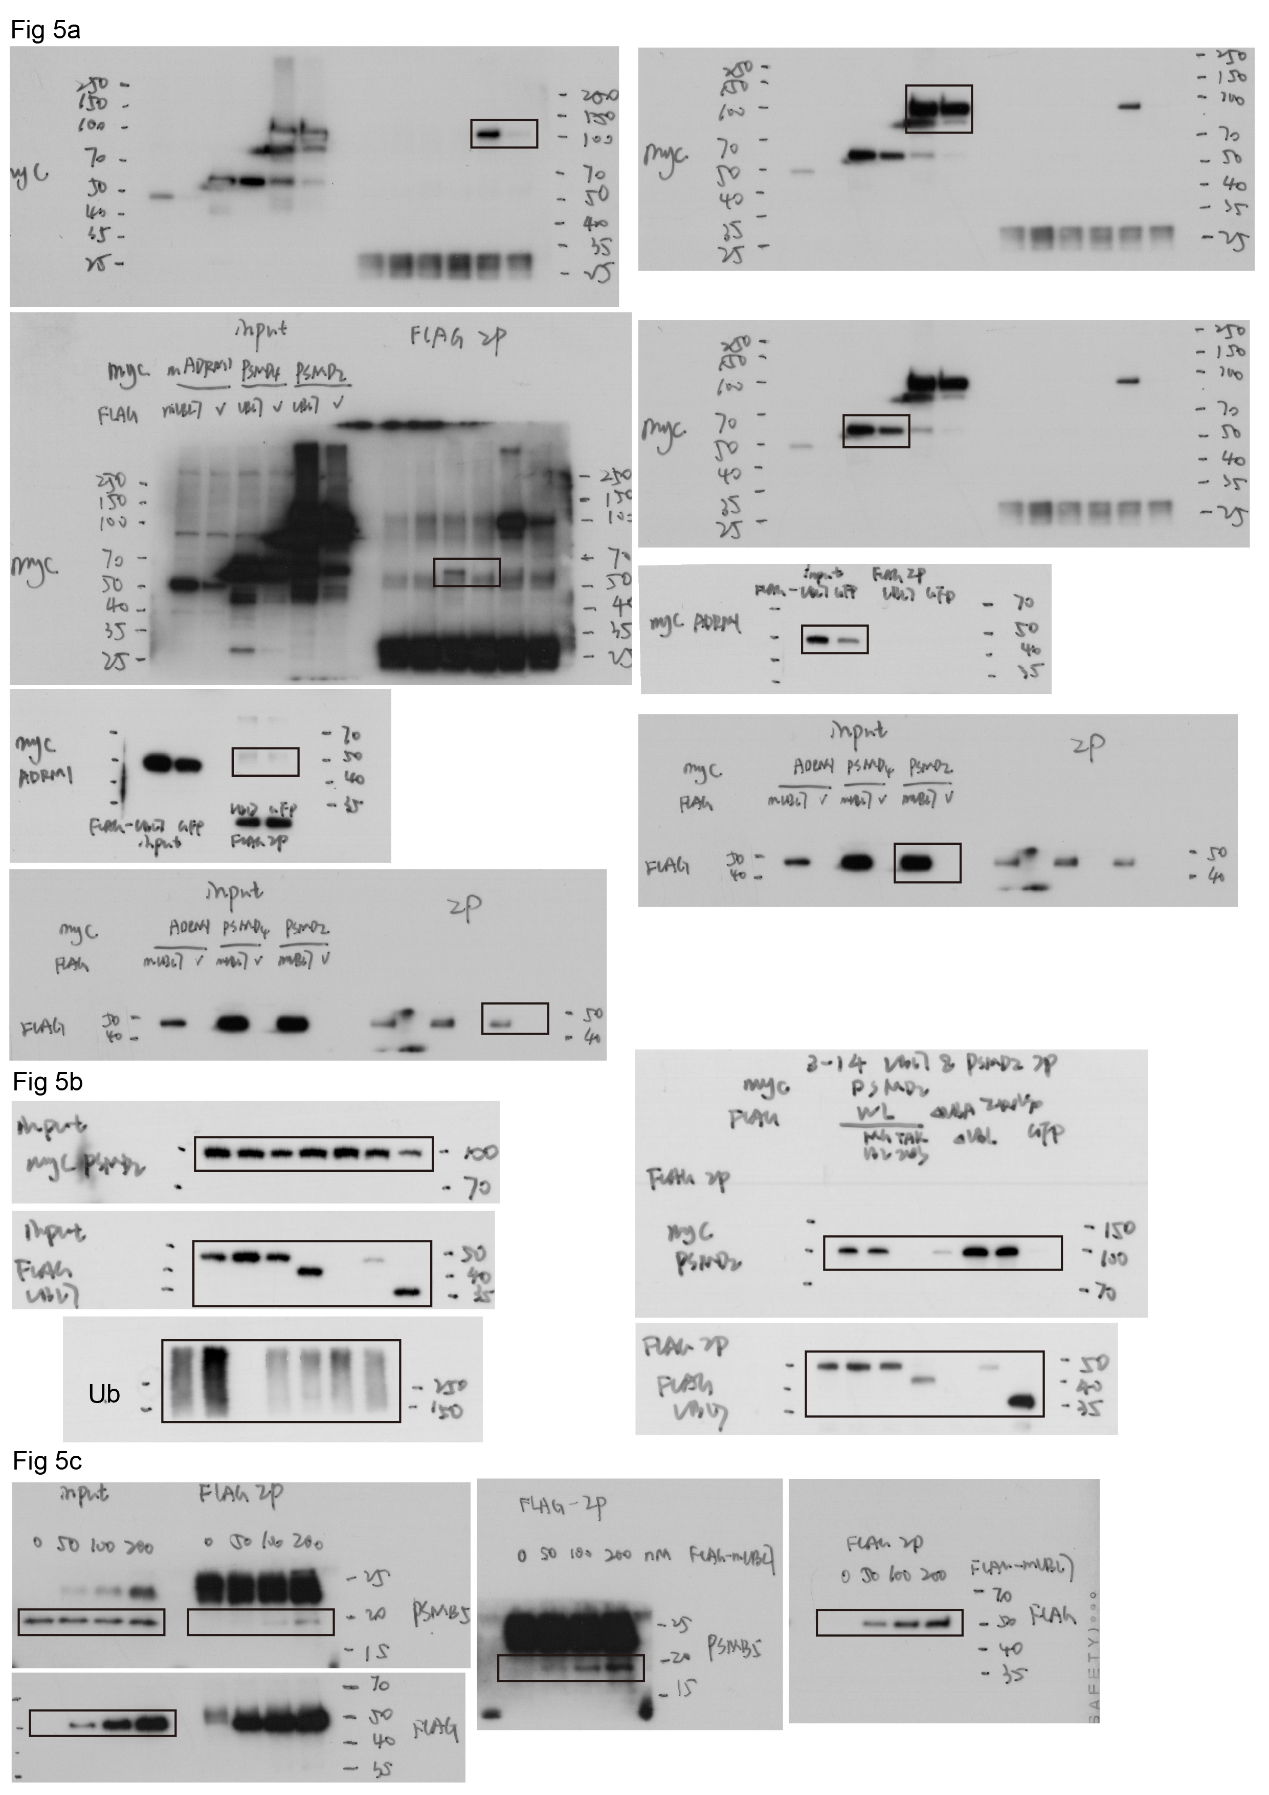

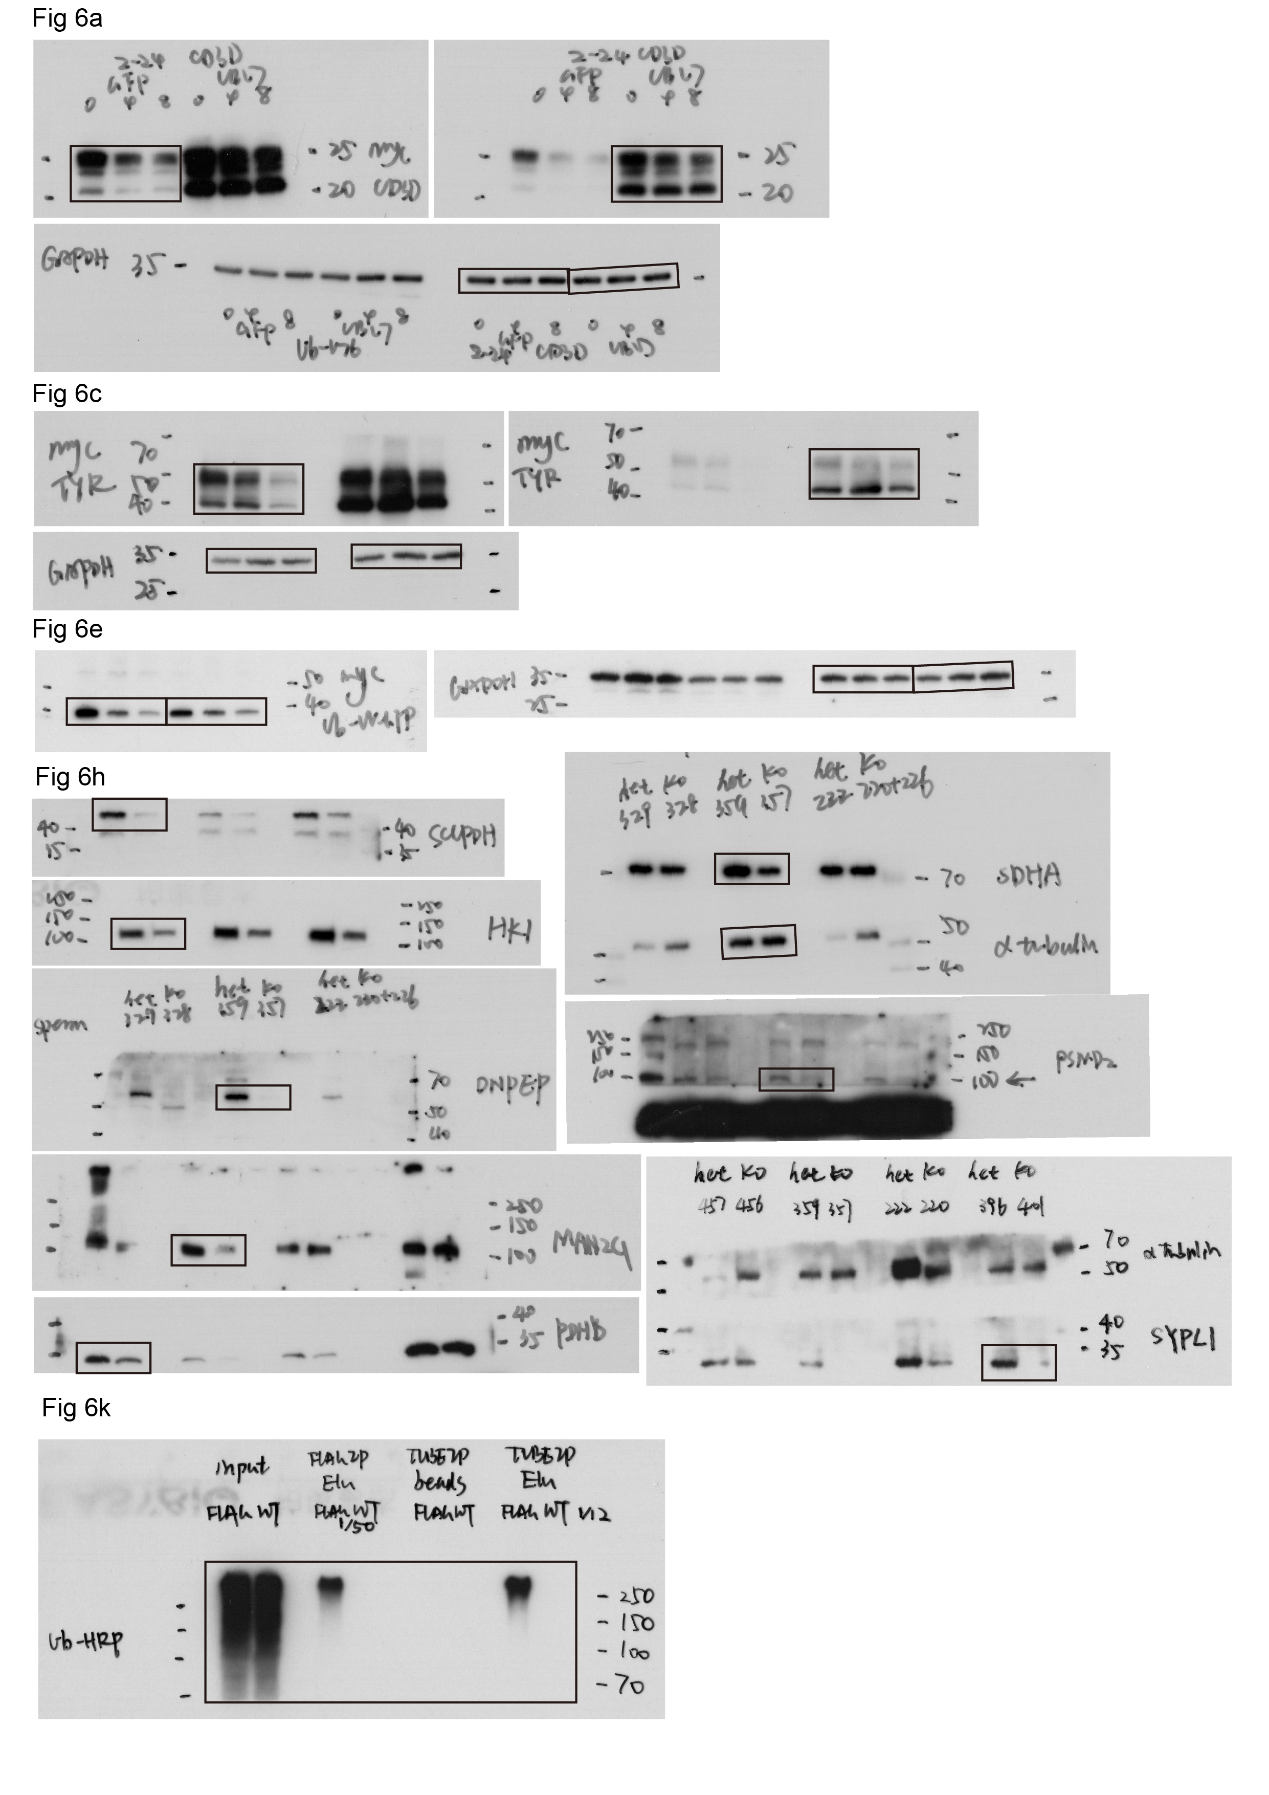

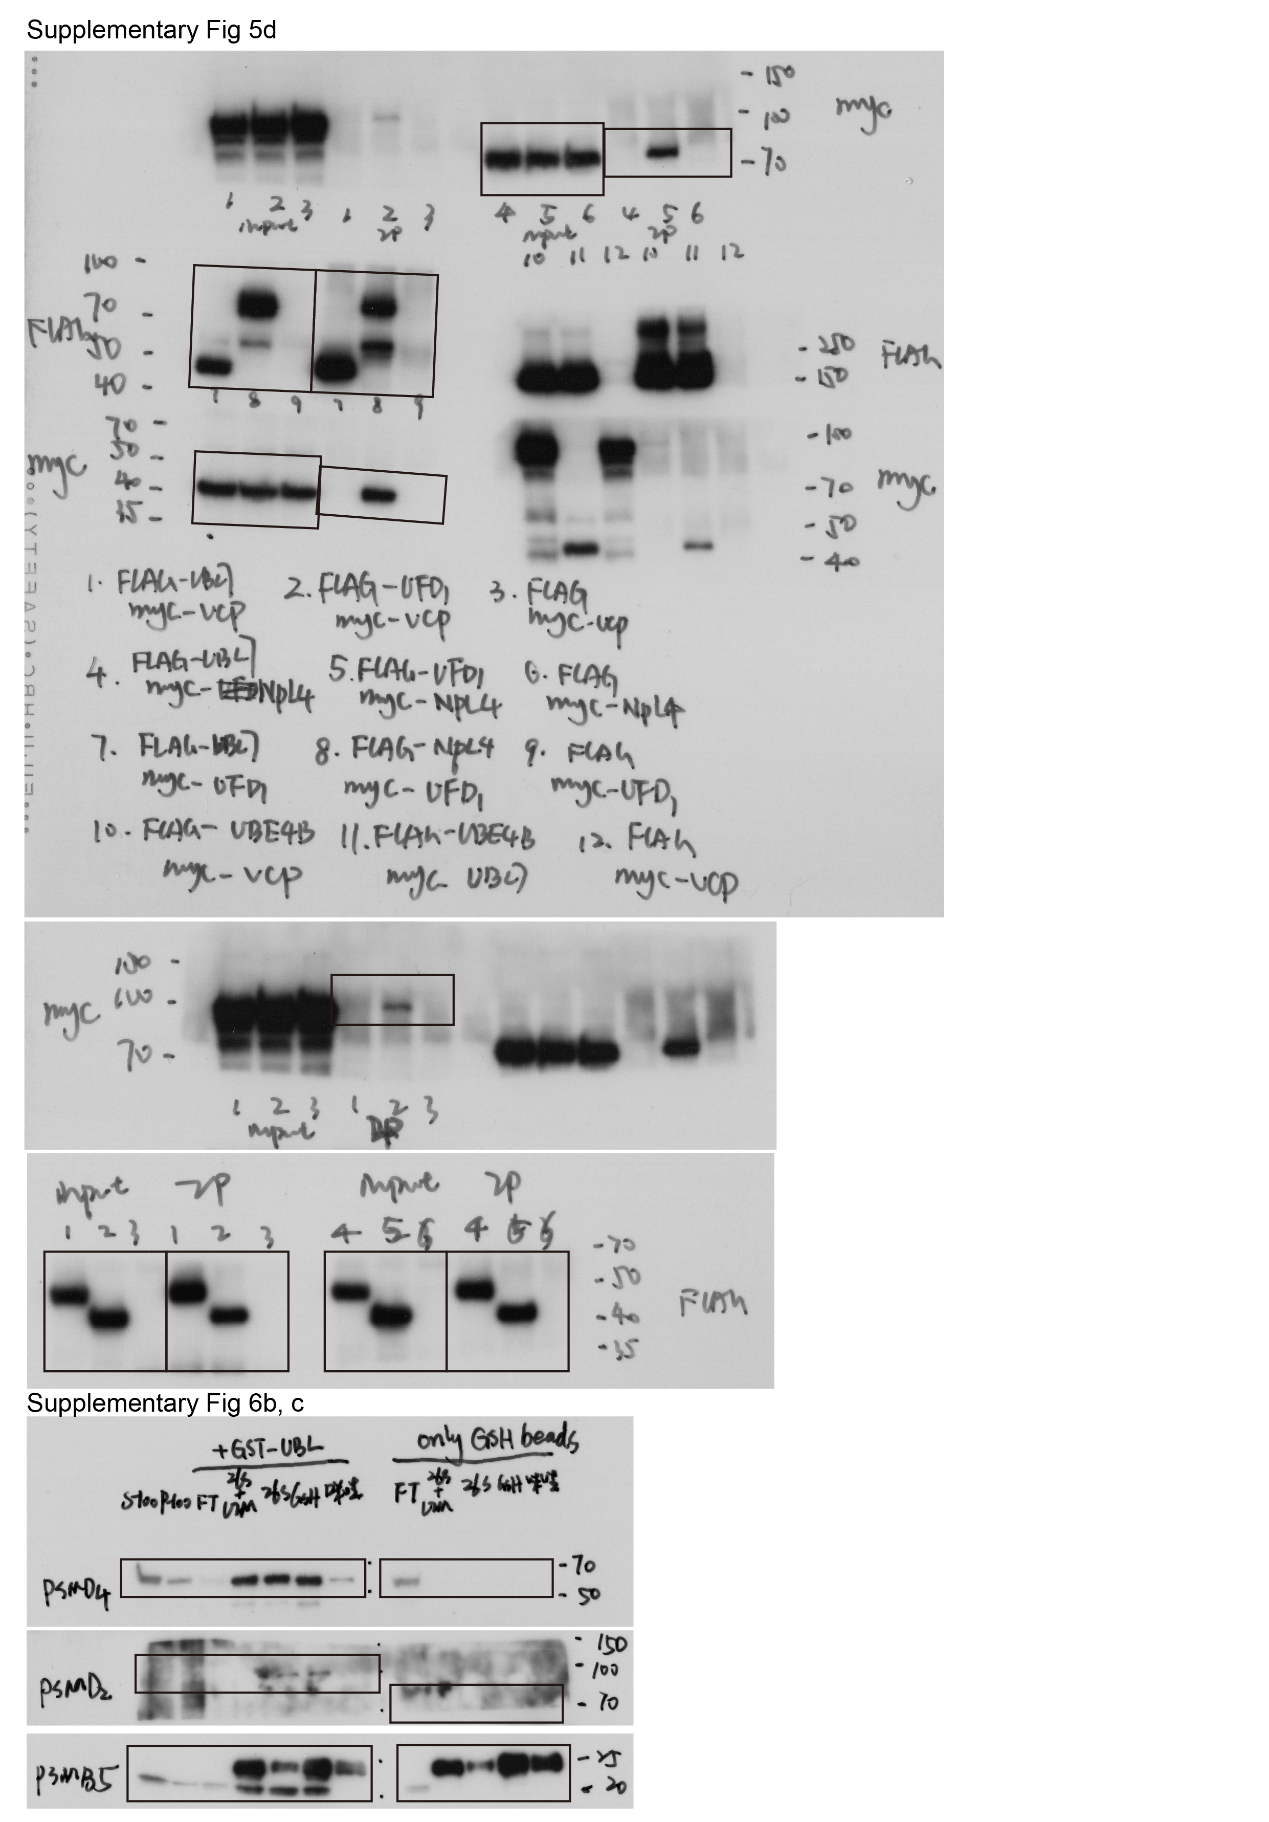

Supplement: Supplementary file 7 [file 7146c59a8ab0c4d84335a653.docx]
