# Supplementary material for: UBL7 is indispensable for spermiogenesis through protecting critical factors from excessive degradation by proteasomes
Source: Research Square preprint supplement (doi:10.21203/rs.3.rs-5024972/v1), 2024-09-11
Supplement: Supplementary file 8 [file af6c392f004a58dab1b9e328.xlsx]

## Sheet: Supplementary Table 5
Supplementary Table 5. List of antibodies
Antibody	Source	Cat No.	Application
Rabbit anti-BMSC UbP (UBL7)	Proteintech	11564-1-AP	WB 1:1000; IF 1:200
FITC-conjugate PNA	Sigma-Aldrich	L7381	IF 1:500
Rabbit IgG Isotype Control	Invitrogen	02-6102	IF 1:200
Mouse anti-DDX4 / MVH	Abcam	ab27591	IF 1:500
Mouse anti-α-tubulin	Sigma-Aldrich	T6199	WB 1:5000; IF 1:500
Rabbit anti-Histone H3	ABclonal	A2348	IF 1:500
Rabbit anti-TNP1	Proteintech	17178-1-AP	IF 1:200
Rabbit anti-PRM1	Proteintech	15697-1-AP	IF 1:200
Mouse anti-Ubiquitin	Santa Cruz	sc-8017	IF 1:50
Mouse anti-Septin 4	ABclonal	A10238	IF 1:200
Mouse anti-Flag	Sigma-Aldrich	F1804	IP 1:200; IF 1:200
Rabbit anti-DYKDDDDK tag (Flag)	Proteintech	20543-1-AP	WB 1:3000
Rabbit anti-PGK2	Proteintech	13686-1-AP	IF 1:100; WB 1:1000
Rabbit anti-UBE4B	Proteintech	18148-1-AP	WB 1:1000
Rabbit anti-VCP	Proteintech	10736-1-AP	WB 1:1000
Rabbit anti-NPLOC4	Proteintech	11638-1-AP	WB 1:1000
Mouse anti-Mono- and polyubiquitinylated conjugates (HRP conjugate)	Enzo Life sciences	ENZ-ABS840HRP-0100	WB 1:1000
Rabbit anti-MYC tag	Proteintech	16286-1-AP	WB 1:3000; IP 1:200
Mouse anti-HA.11 Epitope Tag	BioLegend	901501	WB 1:3000; IP 1:200
Rabbit anti-PSMD4	Proteintech	14899-1-AP	WB 1:5000
Rabbit anti-PSMB5	Proteintech	19178-1-AP	WB 1:1000
Mouse anti-PSMD2	Santa Cruz	sc-271775	WB 1:1000
Rabbit anti-SCCPDH	Abclonal	A2148	WB 1:1000; IF 1:200
Rabbit anti-HK1	Cell Signalling Technology	2024	WB 1:1000; IF 1:200
Rabbit anti-DNPEP	Proteintech	15016-1-AP	WB 1:5000; IF 1:200
Mouse anti-MAN2C1	Santa Cruz	sc-377132	WB 1:1000; IF 1:200
Rabbit anti-SDHA	Proteintech	14865-1-AP	WB 1:1000
Rabbit anti-PDNB	Proteintech	14744-1-AP	WB 1:1000
Rabbit anti-SYPL1	Abcam	ab184176	WB 1:1000; IF 1:200
Rabbit anti-TCP1	Proteintech	10320-1-AP	IF 1:200
Alexa Fluor® 594 conjugated goat anti-rabbit IgG	Invitrogen	A-11012	IF 1:500
Alexa Fluor® 488 conjugated donkey anti-rabbit IgG	Invitrogen	A-21206	IF 1:500
Alexa Fluor® 594 conjugated goat anti-mouse IgG	Invitrogen	A-11001	IF 1:500
Alexa Fluor® 647 conjugated donkey anti-mouse IgG	Invitrogen	A-31571	IF 1:500
Alexa Fluor® 488 conjugated donkey anti-mouse IgG	Invitrogen	A-21202	IF 1:500
HRP-conjugated goat anti-rabbit IgG	Sigma-Aldrich	A6154	WB 1:10000
HRP-conjugated goat anti-mouse IgG	Sigma-Aldrich	A4416	WB 1:10000
