# Supplementary material for: UBL7 is indispensable for spermiogenesis through protecting critical factors from excessive degradation by proteasomes
Source: Research Square preprint supplement (doi:10.21203/rs.3.rs-5024972/v1), 2024-09-11
Supplement: Supplementary file 9 [file b10d716ad098bda822818b06.xlsx]

## Sheet: Fig5
Fig. 5d
UBL7 (nM)	peptidase
0	100	100	100	100
100	118.92	98.1731	94.7624	109.762
200	144.74	115.577	104.852	99.4058
500	138.03	130.577	117.723	120.713
1000	129.307	121.053
1500	130.198	114.771
2000	145.096	133.564	126.825
Fig. 5e
200nM 6Ub	1000nM 6Ub	200nM mUBL7	1000nM mUBL7
121.83	206.25	115.577	129.307
147.72	274.26	104.852	121.053
160.4	253.8	99.4058
154.5
