# Supplementary material for: UBL7 is indispensable for spermiogenesis through protecting critical factors from excessive degradation by proteasomes
Source: Research Square preprint supplement (doi:10.21203/rs.3.rs-5024972/v1), 2024-09-11
Supplement: Supplementary file 10 [file b917fff03f1462ab001e5632.xlsx]

## Sheet: Fig2
Fig. 2d			Fig. 2e
Ubl7+/-	Ubl7-/-		Ubl7+/-	Ubl7-/-
15.5173	20.7398		1.97155	4.03862
8.59959	26.1179		2.4939	3.30996
11.4594	27.4868		1.97155	2.91972
7.39939	31.4746		1.61281	1.73679
8.12093	15.5173		1.5315	3.1626
9.05996	17.064		1.17988	1.26524
3.7815	16.5884		1.68699	2.64431
14.5803	19.1717		1.81301	3.60569
11.3465	23.0579		1.68699	2.68496
10.1575	15.9939		2.19207	3.96443
10.1108	19.8831		1.23882	3.11179
11.5671	8.5498		1.13719	3.26321
7.64126	16.6778		1.16057	4.8872
8.61789	23.7632		1.4624	3.57825
9.3811	15.627		1.17073	2.10569
6.05386	15.1911		1.33943	4.23984
14.1291	10.69		2.1128	2.43699
10.0813	8.94004		1.74797	2.81301
6.9187	12.4726		1.64837	3.6128
8.00102	8.41463		1.56199	3.22561
4.68902	18.1921		1.84451	3.16972
9.85976	13.6382		2.28252	2.42581
7.62195	24.5976		1.31911	1.97155
11.7673	15.2632		1.75508	3.41667
10.128	16.7713		2.46748	2.36179
11.1717	21.4929		2.2876	2.80793
12.7083	15.8476		1.50915	2.08537
9.25305	12.4675		3.33841	2.36992
10.5955	11.2012		1.07114	3.33841
10.7795	14.2175		2.09248	2.24797
6.10163	13.0152		2.08537	1.37805
10.5203	18.4817		1.92988	2.56809
11.9878	19.8069		1.68801	2
15.126	14.2673		2.23476	1.72968
11.7429	11.0844		2.33028	2.36992
7.57825	18.4543		1.30386	2.88516
11.6189	7.73272		1.50203	2.2002
8.33943	15.497		2.94207	2.51321
8.02947	22.5152		1.4065	2.01931
9.98882	8.2815		1.30386	1.2185
8.35976	18.7947		1.58841	2.15041
7.11585	12.4299		0.909553	1.44715
6.30589	18.8831		1.20528	1.88313
11.9126	15.5752		1.22155	2.84654
10.4014	21.876		0.863821	1.68699
7.10366	21.9492		0.877033	2.67175
12.622	14.4746		1.32724	2.59146
12.0874	15.3465		1.5315	2.17886
8.56911	20.9644		1.87703	3.68902
8.11179	17.4543		1.33638	3.23476
9.03049	19.6748		2.80793	2.72053
14.2988	11.6159		1.86484	3.85366
8.96748	12.19		1.09959	2.04776
15.8303	12.3669		2.59146	1.68699
11.9685	12.0498		1.88923	2.5498
15.8608	16.9177		2.01931	3.2561
6.72459	9.67378		2.06504	1.63211
9.31098	17.5498		1.5315	2.27744
15.1951	17.5559		2.5498	2.65244
11.2937	14.9959		1.70325	2.63923
13.4126	7.97053		2.01931	1.63923
19.7205	26.0976		2.87297	2.07012
14.4614	13.9604		2.12195	1.86077
11.2154	5.86077		2.07012	2.07927
19.4878	12.4217		2.5437	1.36992
10.8364	14.8679		1.22155	2.31707
9.57317	34.7896		1.76321	3.65549
8.84146	25.7774		2.06504	3.11484
10.4614	24.5224		1.33638	3.16972
10.2957	8.10976		1.35061	2.23679
6.08943	14.5183		1.16972	2.67378
15.4776	13.5559		1.47968	2.94207
18.3557	24.8344		2.05386	3.88516
7.97663	22.376		1.69614	3.17886
12.6839	16.4715		1.6748	2.04065
14.4848	15.8039		2.25711	2.60772
7.62602	11.7754		2.41159	1.70325
17.251	30.3537		1.77845	2.01728
14.689	10.9654		1.94411	2.09248
8.08943	10.5661		1.90447	1.56199
8.32012	12.9197		2.74085	1.63211
18.4217	16.3953		2.66667	1.67581
16.2073	34.1758		3.51626	2.01931
18.0549	15.1687		2.41565	3.01829
11.6037	15.501		1.84146	2.29573
7.80996	11.7754		1.94817	2.8313
8.16972	16.4289		2.30285	1.68496
7.09654	29.1778		1.86077	2.12195
11.0589	11.123		1.66463	2.59756
13.3496	18.253		1.67581	2.55793
7.94919	17.3374		2.93191	3.2561
11.8425	26.3618		1.30386	2.74593
12.7104	24.1961		2.37602	2.72967
12.748	16.7297		2.19512	3.07114
14.0823	15.0203		2.21443	4.21545
14.9604	16.0965		2.16667	4.96646
12.5102	15.4217		2.49695	4.33333
10.6179	14.6809		2.70224	1.56911
11.4502	19.0041		1.33638	3.38618
12.1352	17.9766		1.77642	4.77947
11.4116	23.6413		2.92785	4.4563
16.1016	15.8161		3.35772	2.73171
10.3191	18.9929		1.92581	5.5752
10.313	18.1128		2.08537	3.29573
11.8557	18.9096		2.36992	1.66463
11.3831	18.1819		1.85874	2.27541
16.5996	9.08841		2.77439	1.94207
11.2297	16.9563		2.36992	1.84248
9.9563	14.5041		1.86077	4.90346
14.8344	17.7154		2.07927	1.31606
9.95325	11.4644		2.92073	2.75305
10.4766	19.3059		2.40854	3.26321
9.85163	12.3963		2.10671	3.98272
12.439	20.5061		1.6687	3.47561
10.498	14.7419		2.08537	1.33638
12.6992	8.75711		3.15752	5.9248
11.9339	6.1565		1.93801	2.44715
10.686	15.1687		1.58841	4.32012
10.8537	12.3506		3.11179	3.13821
9.46443	13.874		2.19309	1.05285
13.9695	17.4533		3.44004	3.15752
9.40041	19.5346		2.01931	1.26524
17.9594	13.4431		2.43699	2.53049
9.81402	11.7632		2.94715	2.11992
13.6037	15.7825		2.23679	2.85569
10.1748	22.3465		2.41972	3.1626
10.8648	8.9126		2.10569	2.30793
13.7612	23.2957		2.2063	1.65549
12.4278	15.0478		2.58232	1.96138
15.0183	10.3882		3.38618	2.48069
14.2154	12.6667		2.67175	2.90041
11.8211	16.565		3.1626	1.50915
12.0417	7.58943		3.53659	4.34045
10.5142	5.43394		2.30285	1.94817
8.32317	11.622		2.31606	2.75407
10.7266	16.125		3.68496	2.9878
9.40854	11.1148		1.67581	1.56199
10.4776	17.3669		2.02541	2.91565
12.4949	14.9024		2.98374	1.05285
12.2896	25.2795		4.27744	3.44715
19.6799	8.39634		2.01728	3.21748
12.4075	15.2998		1.58841	1.5315
11.9258	10.1514		2.40854	1.70325
14.4624	16.815		2.23679	2.80793
14.5224	18.6362		1.6687	2.4563
12.5	22.4482		1.55488	1.5813
9.20833	25.6656		2.25508	2.72459
8.93496	14.0569		2.10569	2.80793
8.13008	9.28252		1.12297	1.84451
5.93191	13.4726		2.55081	3.09045
4.40752	18.3364		1.88923	2.73171
7.77846	33.3201		1.66667	2.24695
8.5	18.064		1.5813	4.07825
7.83537	10.7622		1.40345	1.77642
11.999	19.0285		2.08537	2.12195
11.4624	20.4258		1.14329	3.26423
9.25	14.1636		2.85772	1.91565
8.22764	16.9217		1.61077	1.23171
12.9787	15.0742		1.3811	2.63211
16.3841	20.7785		1.26728	2.48069
11.2673	5.88516		2.21748	2.90447
8.83537	7.43191		2.04065	1.56911
7.08435	16.9146		2.06606	2.2876
7.52744	14.4675		1.84858	3.61687
8.92988	16.4177		0.868902	3.10366
11.7693	15.1809		2.00102	2
20.624	6.0437		1.45732	1.58841
8.55285	10.2795		1.04675	1.80589
8.84045	16.0417		0.896341	2.77439
10.8272	11.253		1.36382	2.67175
8.48679	10.8323		1.86687	2.28049
7.34553	9.7063		3.11077	1.56911
10.7856	12.3028		2.52846	2.38618
8.2998	18.5264		1.32114	1.56911
17.8404	14.2663		2.04065	2.53049
7.79573	8.43191		1.5935	2.34045
9.79167	13.9634		1.29675	1.66463
7.15447	13.5935		1.51829	2.99797
9.19004	14.9715		0.783537	3.33841
6.29573	16.9624		2.42886	1.96138
7.32215	14.8811		1.62906	2.77439
8.72764	22.5427		2.05488	2.4624
7.96037	11.9756		2.48069	1.88923
13.6108	9.17886		3.47358	4.24289
14.1087	13.2195		3.38821	2.59045
7.07724	11.0894		5.00102	3.84756
11.7419	13.4644		1.26524	2.28049
14.5569	16.3943		2.98272	2.16972
14.3303	16.0986		2.40854	4.09553
13.3262	10.3313		3.52642	2.60772
9.92886	20.5041		1.97866	2.80691
14.9228	7.73679		1.68496	2.63211
10.9858	22.7439		2.19512	4.64532
12.4451	6.83537		1.61789	2.94106
13.8394	7.85264		1.58841	2.05386
9.39329	7.6687		2.10671	2.04573
9.60772	14.5		1.97155	2.81301
17.4512	8.70224		1.65549	2.35366
12.3293	14.1016		2.4624	2.87703
7.70833	14.0386		3.65041	2.23272
5.66972	20.3892		2.73171	1.75406
10.4563	14.5		1.85061	2.1128
9.22866	15.0234		2.52541	3.10874
10.3933	14.063		1.06707	3.65041
9.62907	10.3628		1.34146	2.82927
7.77846	16.8069		1.92785	3.50915
9.38211	13.5478		1.26524	3.32825
11.1911	11.6179		1.80793	1.58841
13.1941	12.9919		1.38719	2.48069
18.3953	16.6209		1.4939	2.74085
8.76423	13.7967		0.702236	2.28049
4.89024	10.9411		1.60061	4.49695
14.5833	15.0528		1.58943	2.14126
11.9543	16.0589		1.93801	4.43801
10.1636	12.7846		1.50915	3.66362
11.8008	7.4685		1.65549	3.79573
16.7825	15.9024		2	2.19817
9.98374	7.0376		1.49898	1.72764
8.57622	11.5488		1.02337	4.23984
10.3384	9.31098		2.34045	2.60772
9.59451	9.76829		1.49898	2.2876
12.7795	13.6179		1.44715	4.22561
12.2581	8.59045		2.35366	3.87602
10.5376	6.10467		1.36992	3.02846
7.57622	14.4848		1.65549	4.38618
13.0844	14.4299		1.80589	2.2876
8.16362	17.8872		1.50915	1.92988
16.9126	8.02744		0.877033	1.78963
11.81	10.3709		0.894309	2.35366
6.23374	14.4238		1.41463	4.98984
8.37805	17.4472		1.26524	2.14126
8.51118	10.1555		2.05386	4.09553
10.5762	13.2602		0.945122	2.60467
6.36382	10.9573		1.17683	2.99797
11.1047	11.3659		1.27744	3.52642
13.4065	21.6402		1.78963	2.80691
5.9187	20.1717		1.98476	1.05285
11.6291	22.1108		3.61687	2.86992
8.91057	12.5366		1.10976	2.14837
21.0904	6.83537		1.48882	1.69614
8.25102	17.7043		2.91972	1.26423
10.6006	11.2571		3.15752	1.7185
7.92988	9.1189		2.5122	2.21951
10.8455	14.626		1.22764	1.50915
12.3191	11.4065		1.61789	1.88923
4.74492	12.9126		0.992886	1.75406
11.7957	12.2104		1.73679	2.1128
10.9848	19.0376		0.743902	1.57927
14.1128	13.9837		2	2.28049
10.9736	15.564		1.86484	2.44411
13.561	14.0904		1.05285	1.56911
11.8049	8.47256		1.73679	1.27744
10.2276	13.7713		1.61789	1.49898
16.8689	10.3913		1.92988	1.36992
11.3028	12.001		1.22764	1.96138
6.90346	10.5528		1.88923	2.1128
10.002	20.4939		3.53049	1.88923
6.22561	9.06606		1.75406	1.86484
11.7642	10.3374		2.28049	1.56911
12.2378	10.0102		1.10976	2.28049
9.10874	8.87907		1.10976	3.22053
10.939	10.249		2.65447	2.11992
11.4167	9.47358		2.6372	2.98272
5.52033	11.5163		0.877033	2.1128
7.83232	19.2287		1.06707	2.38618
10.188	6.56911		1.36992	1.86484
6.18293	13.0935		1.80589	3.61687
11.6026	7.00915		0.784553	2.4563
7.05285	25.5122		4.5752	2.63211
10.003	9.07724		1.96138	2.99797
10.7154	13.2175		1.8313	3.35163
11.9848	8.8689		1.44715	1.48882
7.94411	8.00813		1.44715	2.94106
9.89024	13.4675		1.40345	2.4624
11.189	13.6839		2.60772	1.75406
8.88313	13.249		1.44715	1.56911
11.6819	16.8394		1.61789	2.87703
15.1636	32.2886		3.1626	2.35366
9.26118	10.0122		1.48882	2.30793
6.5315	16.6535		3.13821	4.40041
8.20528	18.9014		1.72764	2.38618
12.7693	17.063		1.41463	2.89329
10.0915	8.27236		2.2876	2.36077
3.93293	14.4014		2.35366	3.13821
6.11992	11.9543		2.72358	2.60772
9.45833	12.7632		2.98272	3.375
14.4533	17.3821		2	1.40345
9.96545	13.8049		1.96138	1.8313
7.24187	13.5904		2.4939	1.98476
8.89024	27.1026		2.43699	1.41463
10.4634	13.7632		2.98272	3.48272
11.372	7.98882		2.04776	3.51321
18.0274	17.4411		1.86484	3.1626
9.47561	16.9065		2.50915	2.5122
12.1341	18.7815		2.62907	2.4939
6.30894	11.4248		3.52642	2.13415
7.17785	8.87297		2.77439	2.74085
8.1372	8.56809		3.51321	1.86484
8.67175	14.9289		2	2.05386
8.63618	30.7439		1.76321	4.05081
11.2215	8.8374		3.06402	2.80691
4.96748	8.19919		2.4563	2.9878
8.88415	21.7317		1.66463	2.60772
7.48069	14.0173		2.1128	3.06402
13.8232	15.1423		1.86484	3.75
11.8049	16.124		2.21951	2.85569
12.2571	15.9848		3.70122	2.68394
6.17073	18.2287		4.09146	0.894309
8.41159	9.10874		2.1128	0.743902
9.42276	9.37398		1.41463	2.87703
13.0965	23.8872		1.8313	3.17785
13.3465	16.686		2.87703	1.88923
13.2886	18.4665		1.88923	2.77439
11.0437	10.9411		1.46037	2.14126
6.20935	22.6006		1.50915	3.68801
4.48476	26.5325		1.89329	2.6372
11.4014	18.4299		3.23476	3.51321
11.2876	16.1575		2.04776	2.60772
13.1433	17.6687		2.47053	2
11.0559	40.8801		1.02642	1.76321
12.0447	10.8018		4.03252	2.89329
6.01829	15.814		2.2002	2.6372
9.29776	16.7246		1.63211	1.75406
8.98069	32.9685		2.19309	2.2876
12.4207	15.3923		3.08537	1.96138
13.9736	10.7358		2.02541	1.56911
15.7073	8.41972		2.04573	1.61789
8.99492	11.0518		1.37297	2.38618
7.84045	7.95935		1.70325	2.11992
6.85163	6.87398		2.44411	1.61789
12.2083	8.27439		1.875	1.05285
5.56301	12.1372		3.44004	1.10976
10.7652	11.3699		2.12398	1.12297
9.3689	22.9756		2.47053	2.1128
7.61382	8.11585		1.97155	2.34045
16.2236	15.3587		2.02541	2.85569
10.814	21.9492		2.5315	1.24085
10.7734	10.2703		1.98882	1.33638
9.1626	12.5		2.10874	2.21951
8.10671	15.0539		1.50915	2.38618
5.89024	24.9177		3.89329	2.4624
10.247	18.8161		3.67378	2.1128
11.2978	10.6108		1.41667	1.66463
7.2124	11.7744		2.03455	2.21951
10.2266	25.7134		1.97155	2.34045
10.2683	15.0661		2.8252	2.05386
10.5823	13.3252		1.14329	2.38618
11.0437	14.3374		2.85366	1.93801
7.60467	13.4065		2.10671	2.11992
14.25	21.6829		3.08537	1.12297
10.8709	15.6829		1.72358	1.02337
8.12602	18.9167		2.01931	2.83435
6.61789	10.8293		1.6687	1.36992
4.375	22.4421		2.80793	3.30996
7.00711	23.2703		1.8313	2.13415
7.80285	16.1047		1.2561	3.22053
18.0935	22.4248		2.2876	2.19817
10.5102	22.1992		3.22561	3.26321
9.07317	11.8089		1.64837	2.28049
10.5041	11.1778		1.41463	2.85569
11.4268	12.0793		1.8313	2
6.42175	6.37297		1.41463	2.98272
9.1128	14.0833		1.69411	2.85569
11.7104	18.3313		2.2002	3.7876
7.41057	15.561		1.92581	2.24695
14.8394	15.0102		1.41667	1.33638
9.5122	13.3811		2.31707	2.44411
7.26829	16.1911		2.63923	1.78963
10.2917	11.1839		2.2876	2.63211
6.63313	11.6961		2.19512	1.86484
12.2144	14.1738		2.5315	2.74085
12.2114	10.0285		2.5498	1.48882
10.5346	11.1677		1.92378	1.40345
11.9522	13.7236		1.67581	0.632114
6.39431	7.96341		1.11687	1.26524
16.3852	13.1199		1.5813	2.4939
7.2378	17.2266		2.67785	0.945122
16.6067	6.72053		1.29472	1.41463
13.1778	11.3821		2.47053	2.14126
11.25	13.3506		1.14024	0.784553
14.0132	8.85976		1.85874	2.36077
9.74085	12.0874		1.4065	1.72764
11.9634	13.5488		1.10976	1.65549
7.93394	13.4146		1.60061	2.6372
8.2937	11.7896		1.50915	1.75406
10.3435	8.69512		1.44715	2.21951
12.9065	5.84756		0.91565	1.76321
7.8689	15.1321		1.14329	1.49898
8.34756	11.5437		1.6687	2.5122
8.73374	15.624		2.91565	2.14126
9.8872	12.3659		1.7998	1.66463
12.9451	13.248		2.8313	3.06402
12.9594	16.1128		2.6372	2.67175
7.67785	14.1189		1.05589	0.702236
15.8821	9.03659		1.49898	1.61789
	11.8648			2.35366
	8.87297			3.22053
	6.19309			1.36992
	14.9949			1.10976
	13.1545			2.87703
	5.14634			1.41463
