# Supplementary material for: UBL7 is indispensable for spermiogenesis through protecting critical factors from excessive degradation by proteasomes
Source: Research Square preprint supplement (doi:10.21203/rs.3.rs-5024972/v1), 2024-09-11
Supplement: Supplementary file 11 [file c5bc80f2a65c69b63a37a262.xlsx]

## Sheet: Supplementary Fig6
Supplementary Fig. 6e
time	26S	26S+MG132
0:00:00	4402	1605
0:05:00	5845	1610
0:10:00	7765	1590
0:15:00	9720	1588
0:20:00	11768	1579
0:25:00	13755	1592
0:30:00	15553	1572
0:35:00	17382	1575
0:40:00	19071	1565
0:45:00	20686	1585
0:50:00	22078	1584
0:55:00	23482	1580
1:00:00	24799	1575
