# Supplementary material for: UBL7 is indispensable for spermiogenesis through protecting critical factors from excessive degradation by proteasomes
Source: Research Square preprint supplement (doi:10.21203/rs.3.rs-5024972/v1), 2024-09-11
Supplement: Supplementary file 12 [file c5e80b5c47fc138133d158da.xlsx]

## Sheet: Fig3
Fig. 3b
	Normal	Hless	HNB	MPB	MPG
Ubl7+/-	93.4673	2.01005	2.51256	1.00503	1.00503
	80.1653	9.09091	4.54545	4.54545	0.826446
	78.8732	8.4507	7.98122	4.22535	0.938967
	86.3636	6.81818	4.54545	1.70454	0
	81.1881	5.94059	8.91089	4.9505	0
Ubl7-/-	5.85938	37.5	14.0625	20.7031	26.9531
	5.04587	25.2294	31.6514	29.8165	29.8165
	19.7425	20.1717	31.7597	26.1803	26.1803
	14.2857	21.4286	33.3333	26.1905	30.9524
	24.7863	16.2393	31.6239	24.7863	13.6752
Fig. 3f
	Ubl7+/-				Ubl7-/-
Caput Sp	70.8108	61.7188	43.7186	59.6939	21.831	17.8218	11.1111	20.7483
Cauda Sp	32.4324	41.5254	36.1702	38.6364	6.84931	12.6214	7.75194	9.02778
Fig. 3g
Ubl7+/-	Ubl7-/-
31.5315	6.16438
16.9491	7.76699
25.5319	21.7054
29.5454	9.02778
