# Supplementary material for: UBL7 is indispensable for spermiogenesis through protecting critical factors from excessive degradation by proteasomes
Source: Research Square preprint supplement (doi:10.21203/rs.3.rs-5024972/v1), 2024-09-11
Supplement: Supplementary file 13 [file d6c9c56b01fcb028135b352a.xlsx]

## Sheet: Supplementary Table 1
Supplementary Table 1. UBL7-interacting proteins in germ cell identified by co-immunoprecipitation and mass spectrometry.
Proteins differently represented in FLAG-IP of Ubl7flag/flag and WT testis or spermatids were classified into five categories based on molecular functions. Results from two repeats of FLAG-UBL7 IP in testis (repeat 1 and repeat 2) and one IP in isolated spermatids (repeat 3 (ES+RS)) are showed in the table.
Gene name	MS matched queries
	repeat 1		repeat 2		repeat 3 (ES+RS)
	FLAG	ctrl	FLAG	ctrl	FLAG	ctrl
Ubl7	195	0	81	0	58	0
VCP-complex
Ube4b	343	0	169	0	153	0
Vcp	136	7	45	15	76	2
Ngly1	38	0	6	0	26	0
Ufd1	17	0	5	0	11	0
Npl4	17	0	4	0	11	0
Faf2	13	0	5	0	12	0
Ubiquitin related protein
Uba52	43	3	13	5	35	0
Proteasome related proteins
Psmd2	7	0	0	1	8	0
Psmc3	6	0	0	2	2	0
Psmc5	9	0	0	0	3	0
Chaperonin proteins
Bag6	2	0	6	0	3	0
Tcp-1	16	3	0	5	7	3
Other proteins
Bscl2	12	0	7	0	11	0
Sp17	28	0	23	0	15	0
