# Supplementary material for: UBL7 is indispensable for spermiogenesis through protecting critical factors from excessive degradation by proteasomes
Source: Research Square preprint supplement (doi:10.21203/rs.3.rs-5024972/v1), 2024-09-11
Supplement: Supplementary file 14 [file f1e227bb6f7946fbb34b2d1d.xlsx]

## Sheet: Fig6
Fig. 6b
CHX(hrs)	ctrl			UBL7
0	100	100	100	100	100	100
4	70.3931	64.812	48.4083	70.8341	82.0902	81.7685
8	36.3602	37.027	37.6428	52.8846	71.5033	67.1719
Fig. 6d
CHX(hrs)	ctrl			UBL7
0	100	100	100	100	100	100
4	68.8774	54.9378	49.6796	79.6743	74.3037	75.0592
8	21.2943	19.1542	6.26628	52.747	67.8794	76.404
Fig. 6f
CHX(hrs)	ctrl
0	100	100	100	100	100
4	25.5623	49.4351	76.8124	54.5693	60.9974
8	8.38039	24.3699	20.9972	9.09214	32.7055
CHX(hrs)	UBL7
0	100	100	100	100	100
4	41.8745	38.203	29.8795	65.3607	85.8155
8	32.4618	17.6338	17.7513	40.2229	49.2245
Fig. 6i
	Ubl7+/-			Ubl7-/-
SCCPDH	100	100	100	13.4284	39.2763	39.8493
HK1	100	100	100	47.1493	56.2573	46.8992
DNPEP	100	100	100	11.5912	4.88403	1.96365
MAN2C1	100	100	100	9.97379	48.4808	1.83306
SDHA	100	100	100	38.8486	58.1767	20.8967
PDHB	100	100	100	71.7961	36.2978	27.641
PSMD2	100	100	100	81.6841	79.912	77.7078
SYPL1	100	100	100	13.7166	5.68539	10.7225
Fig. 6m
Gene	repeat 1	repeat 2	repeat 3
Gstm5	0.495	0.411	0.472
Hk1	0.449	0.472	0.46
Actb	0.513	0.456	0.564
Pgam2	0.57	0.523	0.46
Pfkp	0.519	0.535	0.511
Psmd1	0.493	0.535	0.558
Gapdhs	0.529	0.561	0.534
Ube3a	0.514	0.54	0.575
Psmd2	0.52	0.582	0.606
Ywhaz	0.56	0.595	0.603
Pebp1	0.628	0.635	0.522
Pfkm	0.576	0.57	0.652
Sucla2	0.59	0.588	0.628
Nup210l	0.556	0.658	0.624
Psmd3	0.556	0.616	0.68
Herc4	0.547	0.655	0.662
Cct5	0.571	0.648	0.655
Atp1a4	0.574	0.622	0.679
Cul3	0.566	0.642	0.68
Huwe1	0.569	0.655	0.697
Ube4b	0.384	0.505	1.092
Faf1	0.53	0.77	0.711
Ldhal6b	0.624	0.642	0.746
Cct3	0.628	0.694	0.703
Hspa1l	0.672	0.698	0.674
Slc2a3	0.588	0.768	0.703
Ubac1	0.534	0.717	0.813
Ttc39d	0.657	0.709	0.75
Nploc4	0.641	0.792	0.754
Plaa	0.682	0.789	0.726
Aco2	0.79	0.669	0.751
Ngly1	0.677	0.769	0.795
Fkbp1a	0.645	0.776	0.82
Ubr4	0.672	0.815	0.787
Dlat	0.73	0.806	0.749
Cand1	0.708	0.799	0.8
Nup85	0.678	0.749	0.976
Eef2	0.706	0.906	0.867
Hspa2	0.736	0.879	0.895
Lancl1	0.727	0.929	0.878
Polr2b	0.727	0.833	0.983
Spata20	0.679	0.956	0.932
Alb	0.861	0.956	0.768
Ubqln2	0.654	0.992	0.965
Hsp90aa1	0.825	0.94	0.865
Cad	0.745	0.999	0.89
Piwil1	0.841	0.897	0.912
Pabpc2	0.848	1.057	0.756
Gosr2	0.817	0.927	0.924
Dsp	0.847	0.908	0.925
Anxa2	0.713	0.937	1.044
Abce1	0.873	1.05	0.808
Tubb2b	0.78	1.122	0.837
Ldha	0.734	0.968	1.07
Slmap	0.781	0.937	1.063
Acyp1	0.731	1.081	1.007
Usp9x	0.862	0.953	1.051
Nfxl1	1.051	0.934	0.885
Amfr	0.983	0.943	0.986
Fxr1	0.736	1.147	1.029
Hnrnpk	0.977	0.948	1.046
Tmem87a	1.234	0.916	0.844
Hspa8	1	0.981	1.03
Atp2a2	1.128	0.994	0.923
Hsp90b1	1.137	1.053	0.884
Clgn	1.2	1.023	0.871
Ybx2	0.943	1.048	1.112
Srrm2	0.936	1.18	1
Ddi2	0.79	1.206	1.134
Canx	1.193	1.056	0.977
Nasp	1.068	1.053	1.142
Slc7a5	1.069	1.063	1.22
Hist1h1d	0.953	0.931	1.487
Clint1	1.431	1.071	0.926
Ift140	0.84	1.589	1.028
Hist1h1c	0.998	1.015	1.447
Prss1	1.471	0.997	1.092
Pdilt	1.122	1.276	1.446
Aldh2	1.117	1.597	1.762
