# Supplementary material for: UBL7 is indispensable for spermiogenesis through protecting critical factors from excessive degradation by proteasomes
Source: Research Square preprint supplement (doi:10.21203/rs.3.rs-5024972/v1), 2024-09-11
Supplement: Supplementary file 15 [file fdbceb1c5cece29c79719ce4.xlsx]

## Sheet: Supplementary Table 4
Supplementary Table 4. List of primers
Primers for genotyping	Sequence
Ubl7-screen-F	TCTTTTATCTTGCTCCTTCCAGCCTTG
Ubl7-screen-R	GCCCTTCCAATCTCCATACAATGACTG
Ubl7-WT-R	GGGGGATCTTGTCACATGAAAGAGG
Ubl7-3FLAG-seq-F	GGAGAGATGAGTAGGGAGGTGGGTTG
Ubl7-3FLAG-seq-R	CTCCTGCCAATGAAGACTCACCGA
Primers for cloning	Sequence
m-UBL7-EcoRI-F	GTGTGGTGGAATTCATCTCTCTCAGACTGGCATCTGGCA
m-UBL7-NotI-R	CTCGAGCGGCCGCTCATGGGGCTCCTCCAGCAA
mUBL7-d-UBA-R	AACGGGCCCTCTAGACTCGAGCGGCCGCTCATGGGGCTCCGGGCTGCCCAGAGGCCTG
mUBL7-d-UBL-R1	CAGGTTTCTGAAGTGGCTGGTCAGCCAGCT
mUBL7-d-UBL-F2	CCAGCCACTTCAGAAACCTGAACCTGTGGAC
mUBL7-d-UBL-F4	CCAGCCACTTATCGATTTGATCTACTGTGGCC
mUBL7-d-UBL-R3	CAGGTTTCTGCAGCTCCGGGTCTGGAACAG
mUBL7-d-UBL-F3	CCCGGAGCTGCAGAAACCTGAACCTGTGGAC
mUBL7-V70A-F	GATGACCAGACCCTTGACTTCTATGGTATTCAGCCTGGATCCACAGCCCATGTTCTCCGAAAATC
mUBL7-I44A-R	AAGTCAAGGGTCTGGTCATCTTTTAGCTTCCGGCCACAGTAGATCAAATCGGCCAGCTCCGGGTC
mUBL7-UBA-F-BamHI	TTCTGTTCCAGGGGCCCCTGGGATCCAGCCTTCAGATCCAGTGGCA
mUBL7-UBA-R-His-NotI	GATCGTCAGTCAGTCACGATGCGGCCGCGTGGTGATGATGGTGATGTCCAGCAAAGATGAGTTCCAG
UBA-1-R	GGCTACGAAGACAGCCACCTCCAGCAAAGATGAGTTCC
UBA-2-F	GGCTACGAAGACAGGTGGAGGTAGCCTTCAGATC
UBA-2-R	GGCTACGAAGACATTCCACCTCCAGCAAAGATGAGTTCC
UBA-3-F	GGCTACGAAGACATTGGAGGTAGCCTTCAGATC
UBA-3-R	GGCTACGAAGACCGGCTACCTCCACCTCCAGCAAAGATGAGTTC
UBA-4-F	GGCTACGAAGACCGTAGCCTTCAGATCCAGTG
m-VCP-BamHI-F	GAGCTCGGATCCGCCTCTGGAGCCGATTCAAAAGG
m-VCP-NotI-R	CTCGAGCGGCCGCTTAGCCATACAGGTCATCGTCATTGTC
m-UFD1-BamHI-F	GAGCTCGGATCCTTTTCTTTCAACATGTTTGACCACCCG
m-Nploc4-EcoRI-F	GTGTGGTGGAATTCAGCCGAGAGCATCATAATCCGTG
m-UFD1-NotI-R	CTCGAGCGGCCGCTTAGGGCTTTCTTCCCTTCTTACGC
m-UBE4B-KpnI-F	GCTTGGTACCATGGAGGAGCTGAGCGCTG
m-UBE4B-NotI-R	CGCTACCGCGGCCGCTGTGGTCACTGCTCTGTTTCTCTCTC
mPSMD4-F	ATAAGCTTGGTACCGAGCTCGGATCCATGGTGTTGGAGAGCACTATGGTTTG
mPSMD4-NotI-R	AACGGGCCCTCTAGACTCGAGCGGCCGCTCACTTCTTCTCTTCCTCTTTCTTGTCATTC
mPSMD2-F	ATAAGCTTGGTACCGAGCTCGGATCCATGGAGGAGGGTGGACGAGAC
mPSMD2-R	CGCGGGCCCTCTAGACTCGAGCGGCCGCTCAAAGATCATAGTTGGGGTTCTTCCG
mADRM1-F	ATAAGCTTGGTACCGAGCTCGGATCCATGACGACTTCAGGCGCTCTG
mADRM1-R	CGCGGGCCCTCTAGACTCGAGCGGCCGCTTAGTCTAGACTCATATCTTCTTCTTCGTCTTTCTTG
hHR23B-UBL-F	TTCTGTTCCAGGGGCCCCTGGGATCCATGCAGGTCACCCTGAAGACC
hHR23B-UBL-R	GATCGTCAGTCAGTCACGATGCGGCCGCTGCTTTGGGTTTGGTCACCA
hs5a-UIM2-F	GTGGACAGCAAATGGGTCGCGGATCCATGACCATCAGCCAGCAAGAG
UIM-10His-R	GAGTGCGGCCGCGTGATGATGATGATGATGGTGATGATGATGGTCTGCTGATTCCGCCTGG
CD3D-F	TAAGCTTGGTACCGAGCTCGGATCCATGGAACATAGCACGTTTCTCTC
CD3D-R	CGGGCCCTCTAGACTCGAGCGGCCGCTCACTTGTTCCGAGCCCAG
TYR-F	TAAGCTTGGTACCGAGCTCGGATCCATGCTCCTGGCTGTTTTGTACTG
TYR-C89R-F	CTTTTATAATAGGACCCGCCAGTGCTCTGGCAAC
TYR-C89R-R	GTTGCCAGAGCACTGGCGGGTCCTATTATAAAAG
TYR-R	CGGGCCCTCTAGACTCGAGCGGCCGCTCAAGCCTGTAATCCCAGCAT
Ub-GFP-F	TAAGCTTGGTACCGAGCTCGGATCCATGCAGATCTTCGTGAAAACCC
Ub-VV76-F	GAGAGGTGTTGTGGTGAGCAAGGGCGAGG
Ub-VV76-R	CCTTGCTCACCACAACACCTCTCAGACGCAGGA
GFP-Ub-R	CGGGCCCTCTAGACTCGAGCGGCCGCTTACTTGTACAGCTCGTCCATG
